# Supplementary material for: Perceptions of U.S. and Canadian maple syrup producers toward climate change, its impacts, and potential adaptation measures
Source: PLOS journal article supplement (doi:10.1371/journal.pone.0215511), 2019-04-25
Supplement: S1 (10.1371/journal.pone.0215511.s001) [file journal.pone.0215511.s001]

## **Supplementary Material S1**

Survey questionnaire in the format presented to participants, with total responses indicated for each question.

## Section A. General perceptions of climate change

### A.1. How confident are you that the average temperature on Earth is increasing?

| Very confident | Fairly confident | Not too confident | Not confident at all | Not sure | Total answered | No answer |
|----------------|------------------|-------------------|----------------------|----------|----------------|-----------|
| 127            | 138              | 54                | 25                   | 9        | 353            | 1         |

### A.2. Is the Earth getting warmer mostly because of human activity such as burning fossil fuels, or mostly because of natural patterns in the Earth's environment?

| Human activity | A combination | Natural patterns | Not sure | Total answered | No answer |
|----------------|---------------|------------------|----------|----------------|-----------|
| 106            | 166           | 51               | 7        | 330            | 24        |

| Indicate your degree of agreement for the following statements :                           | Strongly disagree | Disagree | Partially disagree | Unsure | Partially agree | Agree | Strongly agree | Total answered | No answer |
|--------------------------------------------------------------------------------------------|-------------------|----------|--------------------|--------|-----------------|-------|----------------|----------------|-----------|
| <b>A.3</b> I have a good knowledge of climate change.                                      | 0                 | 7        | 19                 | 50     | 93              | 112   | 50             | 334            | 20        |
| <b>A.4</b> Climate change impacts are happening slowly enough to let us adapt as it comes. | 20                | 57       | 59                 | 49     | 74              | 58    | 16             | 333            | 21        |
| <b>A.5</b> Climate change is now noticeable in my region.                                  | 11                | 32       | 18                 | 40     | 86              | 105   | 40             | 332            | 22        |
| <b>A.6</b> The impact of climate change on me and my community is tangible.                | 17                | 36       | 34                 | 54     | 84              | 79    | 27             | 331            | 23        |
| <b>A.7</b> The projected impacts of climate change are exaggerated.                        | 44                | 83       | 31                 | 41     | 54              | 50    | 28             | 331            | 23        |

| <b>A.8</b> What do you think is the probability that the following climatic events will happen more frequently <b>in the next 30 years?</b> | Very low | Low | Moderate | High | Very high | Don't know | Total answered | No answer |
|---------------------------------------------------------------------------------------------------------------------------------------------|----------|-----|----------|------|-----------|------------|----------------|-----------|
| <b>A.8.1.</b> High annual mean temperatures                                                                                                 | 8        | 38  | 105      | 97   | 77        | 8          | <b>333</b>     | 21        |
| <b>A.8.2.</b> Heavy rainfall episodes                                                                                                       | 7        | 35  | 97       | 123  | 56        | 15         | <b>333</b>     | 21        |
| <b>A.8.3.</b> Snow and ice storms                                                                                                           | 4        | 27  | 125      | 109  | 51        | 17         | <b>333</b>     | 21        |
| <b>A.8.4.</b> Droughts                                                                                                                      | 12       | 57  | 101      | 102  | 47        | 14         | <b>333</b>     | 21        |
| <b>A.8.5.</b> Forest fires                                                                                                                  | 5        | 61  | 111      | 98   | 45        | 13         | <b>333</b>     | 21        |
| <b>A.8.6.</b> Insect outbreaks                                                                                                              | 9        | 28  | 126      | 102  | 51        | 17         | <b>333</b>     | 21        |
| <b>A.8.7.</b> Warm winters                                                                                                                  | 7        | 29  | 111      | 113  | 61        | 10         | <b>331</b>     | 23        |
| <b>A.8.8.</b> Shifts in timing of the spring period in which freeze-thaw events happen.                                                     | 7        | 33  | 92       | 121  | 70        | 10         | <b>333</b>     | 21        |
| <b>A.8.9.</b> High number of winter thaw events                                                                                             | 7        | 25  | 91       | 126  | 69        | 13         | <b>331</b>     | 23        |
| <b>A.8.10.</b> Severe windstorms                                                                                                            | 6        | 42  | 118      | 102  | 45        | 20         | <b>333</b>     | 21        |
| <b>A.8.11.</b> Summer heatwaves                                                                                                             | 4        | 25  | 119      | 117  | 53        | 15         | <b>333</b>     | 21        |
| <b>A.8.12.</b> Hail storms                                                                                                                  | 10       | 54  | 124      | 86   | 28        | 25         | <b>327</b>     | 27        |
| <b>A.8.13.</b> Extreme high temperature periods during the spring season that prematurely stop or slow sap flows                            | 8        | 49  | 101      | 108  | 47        | 18         | <b>331</b>     | 23        |

## Section B. Climate change impact on maple syrup production

| <b>B.1 In the last decades, which of these climate hazards have caused significant damage to your sugar bush?</b> | Yes | No  | Don't know | Total answered | No answer |
|-------------------------------------------------------------------------------------------------------------------|-----|-----|------------|----------------|-----------|
| <b>B.1.1.</b> Ice storm                                                                                           | 139 | 198 | 13         | 350            | 4         |
| <b>B.1.2.</b> Hail                                                                                                | 15  | 310 | 22         | 347            | 7         |
| <b>B.1.3.</b> Drought                                                                                             | 50  | 263 | 36         | 349            | 5         |
| <b>B.1.4.</b> Windstorm and tornadoes                                                                             | 187 | 151 | 12         | 350            | 4         |
| <b>B.1.5.</b> Forest fire                                                                                         | 1   | 342 | 3          | 346            | 8         |
| <b>B.1.6.</b> Insect outbreak                                                                                     | 59  | 267 | 21         | 347            | 7         |
| <b>B.1.7.</b> Invasive plant species                                                                              | 27  | 280 | 27         | 349            | 5         |

| <b>B.2 In the last decades, what have been the impact of climate change on tap yield?</b> |                 |           |                 |          |                |           |
|-------------------------------------------------------------------------------------------|-----------------|-----------|-----------------|----------|----------------|-----------|
| Positive                                                                                  | Mostly positive | No Impact | Mostly negative | Negative | Total answered | No answer |
| 25                                                                                        | 87              | 170       | 61              | 5        | 348            | 6         |

| Indicate your level of agreement with the following statements concerning <b>current impacts of climate change</b> : | Strongly disagree | Disagree | Partially disagree | Unsure | Partially agree | Agree | Strongly agree | Total answered | No answer |
|----------------------------------------------------------------------------------------------------------------------|-------------------|----------|--------------------|--------|-----------------|-------|----------------|----------------|-----------|
| <b>B.3</b> Maple syrup production is closely linked to climate.                                                      | 14                | 4        | 2                  | 10     | 21              | 132   | 169            | 352            | 2         |
| <b>B.4</b> The beginning of the tapping season is already happening earlier because of climate change.               | 15                | 35       | 31                 | 61     | 75              | 102   | 33             | 352            | 2         |
| <b>B.5</b> Climate change has led to variability in the beginning of the tap season between years.                   | 11                | 32       | 31                 | 56     | 68              | 108   | 44             | 350            | 4         |
| <b>B.6</b> It's now easy to determine the best moment to tap maples.                                                 | 44                | 114      | 46                 | 46     | 52              | 40    | 10             | 352            | 2         |
| <b>B.7</b> In my sugar bush, I have observed an increase in maple dieback because of climate change.                 | 31                | 104      | 36                 | 111    | 38              | 25    | 5              | 350            | 4         |

| <b>B.8 In the next 30 years, what impact will have climate change on tap yield?</b> |                 |           |                 |          |                |           |
|-------------------------------------------------------------------------------------|-----------------|-----------|-----------------|----------|----------------|-----------|
| Positive                                                                            | Mostly positive | No Impact | Mostly negative | Negative | Total answered | No answer |
| 14                                                                                  | 62              | 112       | 145             | 12       | <b>345</b>     | 9         |

| Indicate your level of agreement with the following statements concerning future impacts of climate change:                             | Strongly disagree | Disagree | Partially disagree | Unsure | Partially agree | Agree | Strongly agree | Total answered | No answer |
|-----------------------------------------------------------------------------------------------------------------------------------------|-------------------|----------|--------------------|--------|-----------------|-------|----------------|----------------|-----------|
| <b>B.9 In the next 30 years</b> , the beginning of the sap collection season is going to happen earlier because of climate change.      | 11                | 21       | 24                 | 65     | 75              | 114   | 40             | <b>350</b>     | 4         |
| <b>B.10 In the next 30 years</b> , climate change will lead to variability in the beginning of the sap collection season between years. | 9                 | 21       | 23                 | 61     | 80              | 123   | 35             | <b>352</b>     | 2         |
| <b>B.11 In the future</b> , it will be harder and harder to determine the best moment to tap maples.                                    | 19                | 41       | 33                 | 79     | 67              | 84    | 28             | <b>352</b>     | 2         |

## Section C. Adaptation strategies to climate change

| Indicate your level of agreement with the following statements:                                                                                                                                                   | Strongly disagree | Disagree | Partially disagree | Unsure | Partially agree | Agree | Strongly agree | Total answered | No answer |
|-------------------------------------------------------------------------------------------------------------------------------------------------------------------------------------------------------------------|-------------------|----------|--------------------|--------|-----------------|-------|----------------|----------------|-----------|
| <b>C.1</b> The existing information on climate change impacts on maple syrup production is easily accessible.                                                                                                     | 29                | 113      | 49                 | 86     | 44              | 25    | 5              | <b>351</b>     | 3         |
| <b>C.2</b> Possible adaptations to climate change are numerous for the maple syrup industry.                                                                                                                      | 16                | 104      | 49                 | 81     | 61              | 31    | 9              | <b>351</b>     | 3         |
| <b>C.3</b> New ways to adapt to climate change are needed in the maple syrup industry.                                                                                                                            | 6                 | 20       | 15                 | 55     | 82              | 135   | 37             | <b>350</b>     | 4         |
| <b>C.4</b> I have a wide knowledge of the newest tapping technologies (e.g., high-vacuum tubing, new spouts, liming and fertilizing, reverse osmosis, silvicultural management, tube cleaning/spout replacement). | 5                 | 27       | 28                 | 21     | 90              | 118   | 62             | <b>351</b>     | 3         |
| <b>C.5</b> New maple syrup technologies will help me face the new challenges coming from climate change.                                                                                                          | 6                 | 35       | 30                 | 111    | 90              | 65    | 14             | <b>351</b>     | 3         |
| <b>C.6</b> It is highly probable that I will adopt climate adaptation strategies if I think it could increase my maple syrup production.                                                                          | 4                 | 13       | 15                 | 48     | 82              | 134   | 55             | <b>351</b>     | 3         |
| <b>C.7</b> Before making any changes to adapt to climate change, I will wait to see what effects it has on my maple syrup production.                                                                             | 26                | 59       | 46                 | 54     | 74              | 76    | 14             | <b>349</b>     | 5         |

|                                                                                                                                               | C.8 Which of these adaptation measures would allow <b>producers in general</b> to effectively adapt to climate change? |     |            |                |           | C.9 Which of these adaptation measures would <b>you</b> like to use yourself? |                  |                        |            |                |           |
|-----------------------------------------------------------------------------------------------------------------------------------------------|------------------------------------------------------------------------------------------------------------------------|-----|------------|----------------|-----------|-------------------------------------------------------------------------------|------------------|------------------------|------------|----------------|-----------|
|                                                                                                                                               | Yes                                                                                                                    | No  | Don't know | Total answered | No answer | I am already using it                                                         | I plan to use it | I don't want to use it | Don't know | Total answered | No answer |
| 1. Increasing the sugar bush's number of taps.                                                                                                | 100                                                                                                                    | 201 | 48         | 349            | 5         | 98                                                                            | 97               | 107                    | 48         | 350            | 4         |
| 2. Installing a high-vacuum tubing system for sap collection.                                                                                 | 207                                                                                                                    | 81  | 62         | 350            | 4         | 157                                                                           | 62               | 90                     | 42         | 351            | 3         |
| 3. Tapping earlier in the year.                                                                                                               | 207                                                                                                                    | 87  | 54         | 348            | 6         | 148                                                                           | 88               | 68                     | 41         | 345            | 9         |
| 4. Using spring forecast models of sap flow to predict the perfect moment to tap.                                                             | 190                                                                                                                    | 85  | 75         | 350            | 4         | 106                                                                           | 89               | 66                     | 84         | 345            | 9         |
| 5. Using maples adapted to future climate conditions.                                                                                         | 145                                                                                                                    | 90  | 114        | 349            | 5         | 25                                                                            | 76               | 72                     | 176        | 349            | 5         |
| 6. Doing silvicultural management in your sugar bush to, for example, maintain the density of trees at a good level or to favor biodiversity. | 293                                                                                                                    | 15  | 41         | 349            | 5         | 194                                                                           | 91               | 26                     | 40         | 351            | 3         |
| 7. Liming and fertilizing to limit maples dieback.                                                                                            | 184                                                                                                                    | 65  | 100        | 349            | 5         | 51                                                                            | 112              | 106                    | 82         | 351            | 3         |
| 8. Adopting strong sanitation practices (tubing and spout cleaning and/or annual spout replacement).                                          | 244                                                                                                                    | 61  | 44         | 349            | 5         | 217                                                                           | 64               | 44                     | 25         | 350            | 4         |
| 9. Tapping red maples.                                                                                                                        | 148                                                                                                                    | 103 | 99         | 350            | 4         | 188                                                                           | 20               | 88                     | 55         | 351            | 3         |
| 10. Keeping track of new research about maple production.                                                                                     | 329                                                                                                                    | 8   | 13         | 350            | 4         | 226                                                                           | 99               | 11                     | 14         | 350            | 4         |

| <b>C.10</b> Which of these adaptation measures would you like to see used by <b>the maple syrup industry</b> ?       | Yes | No  | Don't know | Total answered | No answer |
|----------------------------------------------------------------------------------------------------------------------|-----|-----|------------|----------------|-----------|
| <b>C.10.1.</b> Promoting the distinctive syrup harvested in the very late season.                                    | 214 | 78  | 57         | <b>349</b>     | 5         |
| <b>C.10.2.</b> Helping the northward progression of sugar maple by plantation and by human augmented seed transport. | 125 | 102 | 121        | <b>348</b>     | 6         |
| <b>C.10.3.</b> Tapping in the north of the sugar maple distribution range.                                           | 121 | 83  | 143        | <b>347</b>     | 7         |
| <b>C.10.4.</b> Selecting maples that are adapted to future climatic conditions.                                      | 216 | 41  | 92         | <b>349</b>     | 5         |

| <b>C.11</b> To understand how easily <b>your business</b> would be able to adapt (if needed) to any potential impacts of climate change <b>in the future</b> , please indicate if you agree or disagree with each statement below. | Strongly disagree | Disagree | Neither agree nor disagree | Agree | Strongly agree | Total answered | No answer |
|------------------------------------------------------------------------------------------------------------------------------------------------------------------------------------------------------------------------------------|-------------------|----------|----------------------------|-------|----------------|----------------|-----------|
| <b>C.11.1.</b> If any changes in <b>labor</b> (number of workers, and/or hours worked) are needed due to climate change, my business could quickly get the help it needs to operate.                                               | 26                | 93       | 130                        | 89    | 11             | <b>349</b>     | 5         |
| <b>C.11.2.</b> If any changes in maple production <b>technologies</b> are needed due to climate change, my business could afford to quickly adopt the new technologies.                                                            | 28                | 120      | 104                        | 85    | 12             | <b>349</b>     | 5         |
| <b>C.11.3.</b> If any <b>severe damage to my sugar bush</b> occurred due to climate change, my business could quickly change how it collects and/or obtains sap.                                                                   | 47                | 131      | 93                         | 68    | 9              | <b>348</b>     | 6         |



| <b>C.12.</b> Are the following constraints limiting your adoption of new technologies and strategies designed to reduce the impacts of climate change on your business? | Yes | No  | Don't know | Total answered | No answer |
|-------------------------------------------------------------------------------------------------------------------------------------------------------------------------|-----|-----|------------|----------------|-----------|
| <b>C.12.1.</b> Lack of information                                                                                                                                      | 165 | 152 | 32         | <b>349</b>     | 5         |
| <b>C.12.2.</b> Lack of financial means                                                                                                                                  | 208 | 106 | 35         | <b>349</b>     | 5         |
| <b>C.12.3.</b> Lack of technical support                                                                                                                                | 163 | 150 | 37         | <b>350</b>     | 4         |
| <b>C.12.4.</b> I don't believe that climate change will have much impact on my syrup production                                                                         | 87  | 157 | 105        | <b>349</b>     | 5         |

## Section D. Sugar bush characteristics

### D.1 Where is your sugarbush?

| Country                                     | Maple syrup region                     | Province or State | N   |
|---------------------------------------------|----------------------------------------|-------------------|-----|
| <b>Canada</b><br><b>Total answered: 241</b> | <b>Atlantic</b><br>Total answered: 7   | Nova Scotia       | 1   |
|                                             |                                        | New Brunswick     | 6   |
|                                             | <b>Ontario</b>                         | Ontario           | 28  |
|                                             | <b>Quebec</b>                          | Quebec            | 206 |
| <b>U.S.</b><br><b>Total answered: 113</b>   | <b>Northeast</b><br>Total answered: 63 | Connecticut       | 1   |
|                                             |                                        | Maine             | 12  |
|                                             |                                        | Massachusetts     | 4   |
|                                             |                                        | New Hampshire     | 4   |
|                                             |                                        | New Jersey        | 1   |
|                                             |                                        | New York          | 22  |
|                                             |                                        | Pennsylvania      | 4   |
|                                             |                                        | Vermont           | 15  |
|                                             | <b>Midwest</b><br>Total answered: 50   | Illinois          | 5   |
|                                             |                                        | Indiana           | 3   |
|                                             |                                        | Kentucky          | 2   |
|                                             |                                        | Michigan          | 3   |
|                                             |                                        | Minnesota         | 6   |
|                                             |                                        | Missouri          | 1   |
|                                             |                                        | Ohio              | 12  |
|                                             |                                        | Oklahoma          | 1   |
|                                             |                                        | Virginia          | 1   |
|                                             |                                        | Wisconsin         | 16  |

### D.2 How many taps did you collect sap from in your sugar bush in 2016?

$\bar{x} \pm SD = 6442 \pm 13180$   
**Total answered: 354**

### D.3 In 2016, what is the approximate age of the largest maples in your sugar bush?

| 20 - 40 | 40 - 60 | 60 - 80 | 80 - 100 | 100 - 120 | 120 + | Don't know | Total answered | No answer |
|---------|---------|---------|----------|-----------|-------|------------|----------------|-----------|
| 6       | 37      | 79      | 62       | 49        | 97    | 18         | <b>348</b>     | 6         |

| D.4 What harvesting method do you use in your sugar bush? |                       |                            |                            |                |           |
|-----------------------------------------------------------|-----------------------|----------------------------|----------------------------|----------------|-----------|
| Buckets or bags                                           | Tubing without vacuum | Tubing with vacuum < 20 Hg | Tubing with vacuum > 20 Hg | Total answered | No answer |
| 64                                                        | 37                    | 75                         | 172                        | 348            | 6         |

| D.5 How many years of experience do you have in the maple industry? |        |         |         |         |         |         |         |      |                |           |
|---------------------------------------------------------------------|--------|---------|---------|---------|---------|---------|---------|------|----------------|-----------|
| 0 - 5                                                               | 6 - 10 | 11 - 15 | 16 - 20 | 21 - 25 | 26 - 30 | 31 - 35 | 36 - 40 | 41 + | Total answered | No answer |
| 69                                                                  | 67     | 42      | 43      | 28      | 24      | 19      | 18      | 39   | 349            | 5         |

| D.6 Do you have someone to take over your sugar bush once you get retired? |     |                |           |
|----------------------------------------------------------------------------|-----|----------------|-----------|
| Yes                                                                        | No  | Total answered | No answer |
| 174                                                                        | 171 | 345            | 9         |

| D.7 How much (%) of your household income is contributed by your maple sugar business? |          |          |          |          |          |          |          |          |           |                |           |
|----------------------------------------------------------------------------------------|----------|----------|----------|----------|----------|----------|----------|----------|-----------|----------------|-----------|
| 0 - 10%                                                                                | 11 - 20% | 21 - 30% | 31 - 40% | 41 - 50% | 51 - 60% | 61 - 70% | 71 - 80% | 81 - 90% | 91 - 100% | Total answered | No answer |
| 155                                                                                    | 46       | 44       | 16       | 16       | 15       | 9        | 11       | 5        | 30        | 347            | 7         |

| D.8 What was your mean syrup yield for the 2016 season (lbs/tap)(Gallons/tap)? |                        |                        |                       |                       |                        |              |                |           |
|--------------------------------------------------------------------------------|------------------------|------------------------|-----------------------|-----------------------|------------------------|--------------|----------------|-----------|
| (0 - 1) (0 - 0.075)                                                            | (1 - 2) (0.075 - 0.15) | (2 - 3) (0.15 - 0.225) | (3 - 4) (0.225 - 0.3) | (4 - 5) (0.3 - 0.375) | (5 - 6) (0.375 - 0.45) | (6+) (0.45+) | Total answered | No answer |
| 47                                                                             | 80                     | 80                     | 106                   | 48                    | 24                     | 17           | 322            | 32        |

| D.9 During the next 10 years, how much (\$/tap) do you plan to invest in <b>silvicultural work</b> (stand management, liming and fertilizing...) in your sugar bush? |  |
|----------------------------------------------------------------------------------------------------------------------------------------------------------------------|--|
| $\bar{x} \pm SD = 4.37 \pm 11.36$<br><b>Total answered: 353</b>                                                                                                      |  |

| D.10 During the next 10 years, how much (\$/tap) do you plan to invest to <b>upgrade or replace equipment</b> in your sugar bush and sugarhouse (Ex: tubing, inverted osmosis, high-vacuum system, GPS, buckets...)? |  |
|----------------------------------------------------------------------------------------------------------------------------------------------------------------------------------------------------------------------|--|
| $\bar{x} \pm SD = 20.36 \pm 133.54$<br><b>Total answered: 354</b>                                                                                                                                                    |  |

| D.11 How much (\$/tap) do you plan to invest to <b>modernize the infrastructures</b> of your sugar bush during the next 10 years (Ex: restaurant, warehouse, off-road machinery, carriage, forest roads...)? |  |
|--------------------------------------------------------------------------------------------------------------------------------------------------------------------------------------------------------------|--|
| $\bar{x} \pm SD = 10.52 \pm 55.57$<br><b>Total answered: 353</b>                                                                                                                                             |  |

## Section E. General characteristics

### E.1 What is your gender?

| Male | Female | Don't want to answer | Total answered | No answer |
|------|--------|----------------------|----------------|-----------|
| 306  | 44     | 4                    | 354            | 0         |

### E.2 What is your year of birth? (Converted to age of respondents in 2016)

$\bar{x} \pm SD = 49.05 \pm 13.69$   
**Total answered: 354**

### E.3 What is your education level?

| No diploma | High school | College Degree | Post-graduate degree | Total answered | No answer |
|------------|-------------|----------------|----------------------|----------------|-----------|
| 16         | 101         | 151            | 85                   | 353            | 1         |

### E.4 How would you describe your political views on a left to right scale, where left is liberal and right is conservative?

| Left | Center left | Center | Center right | Right | Total answered | No answer |
|------|-------------|--------|--------------|-------|----------------|-----------|
| 24   | 60          | 139    | 80           | 39    | 342            | 12        |
