# Supplementary material for: Perceptions of U.S. and Canadian maple syrup producers toward climate change, its impacts, and potential adaptation measures
Source: PLoS One. 2019 Apr 25;14(4):e0215511. doi: 10.1371/journal.pone.0215511 (PMC6483340; doi:10.1371/journal.pone.0215511)
Supplement: S2 File — Excel file containing the full dataset used for analyses. Column numbers correspond to Table 3 and S1 File. The geographic locations of the sugar bushes (i.e. latitude and longitude coordinates) have been removed from the table to ensure the anonymity of the respondents. (XLSX) [file pone.0215511.s002.xlsx]

## Sheet: Feuil1
ID	1.1.CC_Belief	1.2.MANvsNAT	1.3.Knowledge	1.4.SlowCC	1.5.NoticeableCC	1.6.CCtangible	1.7.CCImpExagerated	1.8.1.Prob30Y_MeanTemp	1.8.2.Prob30Y_HeavyRain	1.8.3.Prob30Y_SnowIceStorm	1.8.4.Prob30Y_Drought	1.8.5.Prob30Y_Fire	1.8.6.Prob30Y_Insect	1.8.7.Prob30Y_WarmWinter	1.8.8.Prob30Y_ShiftSpring	1.8.9.Prob30Y_HighNumbThaws	1.8.10.Prob30Y_SevereWinds	1.8.11.Prob30Y_SumHeatwaves	1.8.12.Prob30Y_Hail	1.8.13.ProbExtremeHighTemp	2.1.1.Damage_IceStorm	2.1.2.Damage_Hail	2.1.3.Damage_Drought	2.1.4.Damage_Windstorm	2.1.5.Damage_Fire	2.1.6.Damage_Insect	2.1.7.Damage_InvasivePlants	2.2.CConYield	2.3.CCProd	2.4.CCEarlierSapBegin	2.5.CCVariabilityInSapBegin	2.6.EasyTapMoment	2.7.CCMapleDieback	2.8.Next30YCConYield	2.9.Next30YEarlierBegin	2.10.Next30YVariabilityInSapBegin	2.11.FutureHarderTapMoment	3.1.SufficientInfoOnCC	3.2.NumberAdaptationsToCC	3.3.NeedOfNewWaysToAdaptToCC	3.4.KnowledgeNewTapTech	3.5.NeedForNewMapleTechToCC	3.6.IWillAdoptStrat	3.7.WaitBeforeAdapt	3.8.1.EffectiveAdapt_IncreaseNumbtap	3.8.2.EffectiveAdapt_HighVacc	3.8.3.EffectiveAdapt_EarlierTap	3.8.4.EffectiveAdapt_UsingForecasts	3.8.5.EffectiveAdapt_AdaptedMaples
1	Not_confident_at_all	Natural_patterns	Unsure	Unsure	Strongly_disagree	Unsure	Strongly_agree	Very_low	Very_low	Very_low	Very_low	Very_low	Very_low	Very_low	Very_low	Very_low	Very_low	Very_low	Very_low	Very_low	No	No	No	No	No	No	No	No_impact	Agree	Strongly_disagree	Disagree	Unsure	Strongly_disagree	No_impact	Strongly_disagree	Strongly_disagree	Strongly_disagree	Strongly_agree	Unsure	Strongly_disagree	Strongly_agree	Unsure	Unsure	Unsure	No	I_don’t_know	I_don’t_know	I_don’t_know	No
2	Fairly_confident	Natural_patterns	Agree	Partially_agree	Agree	Unsure	Agree	Moderate	Moderate	Moderate	Moderate	Moderate	Moderate	Moderate	High	Moderate	Moderate	Moderate	Moderate	Moderate	Yes	No	No	No	No	No	No	Mostly_negative	Agree	Partially_agree	Partially_agree	Disagree	Unsure	No_impact	Partially_agree	Unsure	Agree	Partially_disagree	Partially_disagree	Partially_agree	Disagree	Agree	Disagree	Agree	Yes	Yes	Yes	I_don’t_know	Yes
3	Very_confident	Human_activity	Agree	Disagree	Strongly_agree	Unsure	Disagree	Very_high	Very_high	Very_high	Very_high	Very_high	Very_high	Very_high	Very_high	Moderate	Very_high	Very_high	Very_high	Very_high	Yes	No	Yes	Yes	No	Don’t_know	Yes	Mostly_negative	Agree	Strongly_agree	Agree	Strongly_disagree	Unsure	Mostly_negative	Strongly_agree	Strongly_agree	Strongly_agree	Strongly_disagree	Partially_agree	Agree	Agree	Partially_agree	Agree	Partially_agree	No	Yes	Yes	Yes	Yes
4	Not_too_confident	A_combination	Partially_agree	Partially_agree	Disagree	Partially_disagree	Partially_agree	Low	Low	Low	Low	Moderate	Moderate	Moderate	Low	Low	Moderate	Moderate	Low	Low	Yes	No	No	Yes	No	No	No	No_impact	Agree	Unsure	Unsure	Disagree	Disagree	No_impact	Unsure	Unsure	Unsure	Partially_agree	Partially_agree	Unsure	Partially_agree	Unsure	Unsure	Agree	Yes	Yes	I_don’t_know	Yes	I_don’t_know
5	Not_too_confident	Not_sure	Partially_agree	Strongly_agree	Partially_agree	Partially_disagree	Strongly_agree	Low	Low	Low	Low	Moderate	High	Low	Low	Moderate	Moderate	Moderate	NoAnswer	Low	No	No	No	No	No	No	No	No_impact	Partially_agree	Partially_agree	Partially_disagree	Strongly_disagree	Unsure	No_impact	Partially_agree	Unsure	Strongly_disagree	Unsure	Strongly_agree	Disagree	Partially_agree	Strongly_agree	Strongly_agree	Unsure	Yes	Yes	Yes	I_don’t_know	No
6	Not_confident_at_all	Refused	Strongly_agree	Partially_agree	Partially_agree	Unsure	Strongly_agree	Moderate	Moderate	Moderate	High	Moderate	High	High	Moderate	Moderate	Low	Very_high	High	High	No	No	Yes	No	No	No	No	Mostly_negative	Strongly_agree	Partially_agree	Partially_agree	Partially_disagree	Disagree	Mostly_negative	Partially_agree	Partially_agree	Unsure	Partially_disagree	Partially_disagree	Agree	Partially_disagree	Unsure	Partially_agree	Partially_agree	Yes	Yes	Yes	Yes	Yes
7	Not_sure	Natural_patterns	Agree	Unsure	Partially_agree	Partially_agree	Strongly_agree	Moderate	Moderate	Moderate	Moderate	Moderate	Moderate	Moderate	Moderate	Moderate	Moderate	Moderate	Moderate	Moderate	Yes	No	No	No	No	No	No	Mostly_negative	Strongly_agree	Partially_agree	Partially_agree	Unsure	Disagree	No_impact	Unsure	Unsure	Unsure	Partially_disagree	Unsure	Partially_agree	Partially_agree	Partially_agree	Partially_disagree	Partially_agree	No	Yes	No	No	Yes
8	Not_confident_at_all	Natural_patterns	Agree	Unsure	Strongly_disagree	Strongly_disagree	Strongly_agree	Very_low	Very_low	Very_low	Very_low	Very_low	Very_low	Very_low	Very_low	Low	Very_low	Very_low	Very_low	Very_low	No	No	No	No	No	No	No	No_impact	Strongly_disagree	Strongly_disagree	Strongly_disagree	Strongly_disagree	Strongly_disagree	Positive	Strongly_disagree	Strongly_disagree	Strongly_disagree	Unsure	Unsure	Strongly_disagree	Disagree	Partially_disagree	Strongly_disagree	Strongly_agree	No	No	No	No	No
9	Very_confident	Human_activity	Agree	Disagree	Unsure	Unsure	Disagree	Very_high	High	Don’t_know	Moderate	Moderate	Moderate	Moderate	High	High	Don’t_know	Don’t_know	High	Don’t_know	No	No	No	No	No	No	No	No_impact	Partially_agree	Partially_disagree	Unsure	Strongly_disagree	Disagree	No_impact	Partially_agree	Unsure	Partially_disagree	Disagree	Agree	Unsure	Strongly_agree	Strongly_agree	Strongly_agree	Agree	No	Yes	Yes	Yes	Yes
10	Very_confident	A_combination	Agree	Disagree	Strongly_agree	Partially_agree	Strongly_disagree	Very_high	Moderate	High	High	High	High	High	High	High	High	High	High	High	NoAnswer	NoAnswer	Yes	Yes	NoAnswer	NoAnswer	NoAnswer	Negative	Strongly_agree	Strongly_agree	Strongly_agree	Strongly_disagree	Partially_agree	Mostly_negative	Strongly_agree	Strongly_agree	Strongly_agree	Disagree	Disagree	Agree	Agree	Agree	Agree	Unsure	Yes	Yes	Yes	Yes	Yes
11	Fairly_confident	Human_activity	Agree	Unsure	Agree	Agree	Disagree	High	Very_high	High	High	Very_high	High	High	Very_high	High	Very_high	Very_high	Very_high	High	No	Don’t_know	Yes	No	No	Yes	No	Negative	Strongly_disagree	Strongly_disagree	Strongly_disagree	Disagree	Strongly_disagree	Negative	Strongly_disagree	Strongly_disagree	Strongly_disagree	Agree	Agree	Agree	Agree	Agree	Agree	Agree	Yes	Yes	Yes	Yes	Yes
12	Not_confident_at_all	Natural_patterns	Partially_disagree	Partially_disagree	Partially_agree	Unsure	Unsure	Low	Moderate	Moderate	High	Low	High	Moderate	Moderate	Low	High	Moderate	Moderate	High	Yes	No	No	No	No	No	No	No_impact	Strongly_agree	Agree	Strongly_agree	Disagree	Unsure	Mostly_negative	Partially_agree	Unsure	Unsure	Strongly_disagree	Unsure	Strongly_agree	Partially_agree	Disagree	Strongly_agree	Partially_disagree	I_don’t_know	Yes	Yes	Yes	No
13	Not_confident_at_all	Natural_patterns	Partially_agree	Partially_agree	Disagree	Disagree	Partially_agree	Don’t_know	Don’t_know	Don’t_know	Don’t_know	Don’t_know	Don’t_know	Don’t_know	Don’t_know	Don’t_know	Don’t_know	Don’t_know	Don’t_know	Don’t_know	No	No	Yes	Yes	No	No	No	Mostly_positive	Agree	Disagree	Disagree	Disagree	Disagree	No_impact	Unsure	Agree	Agree	Disagree	Agree	Unsure	Partially_agree	Partially_agree	Agree	Partially_agree	Yes	Yes	Yes	Yes	Yes
14	Fairly_confident	A_combination	Partially_agree	Unsure	Unsure	Partially_agree	Partially_agree	Moderate	Moderate	Moderate	High	High	Moderate	Moderate	Moderate	Moderate	Moderate	High	Moderate	Moderate	No	No	No	No	No	No	No	No_impact	Strongly_agree	Partially_agree	Partially_agree	Partially_disagree	Disagree	No_impact	Partially_disagree	Unsure	Partially_disagree	Disagree	Unsure	Partially_agree	Strongly_agree	Partially_agree	Partially_agree	Strongly_agree	No	Yes	I_don’t_know	Yes	I_don’t_know
15	Very_confident	A_combination	Agree	Partially_agree	Agree	Partially_agree	Disagree	High	High	Moderate	High	High	Moderate	High	High	High	Moderate	High	Moderate	High	No	No	Don’t_know	Yes	No	No	Yes	No_impact	Strongly_agree	Unsure	Agree	Partially_disagree	Unsure	Mostly_negative	Partially_agree	Partially_agree	Partially_agree	Unsure	Unsure	Unsure	Partially_agree	Partially_agree	Partially_agree	Agree	No	Yes	Yes	No	No
16	Not_confident_at_all	Natural_patterns	Agree	Partially_agree	Disagree	Disagree	Agree	Low	Low	Low	Moderate	Moderate	High	Low	Moderate	Moderate	Moderate	Moderate	Low	Low	No	No	No	No	No	No	Don’t_know	No_impact	Agree	Unsure	Partially_agree	Partially_disagree	Partially_disagree	No_impact	Unsure	Unsure	Partially_agree	Agree	Agree	Unsure	Partially_agree	Partially_agree	Partially_agree	Partially_agree	No	I_don’t_know	Yes	I_don’t_know	I_don’t_know
17	Fairly_confident	A_combination	Partially_agree	Agree	Partially_agree	Partially_agree	Partially_disagree	Moderate	Moderate	Moderate	Moderate	Moderate	Moderate	Moderate	Moderate	Moderate	Moderate	Moderate	Moderate	Moderate	Yes	No	No	Yes	No	No	Yes	No_impact	Partially_agree	Partially_agree	Partially_agree	Disagree	Partially_disagree	No_impact	Unsure	Unsure	Unsure	Unsure	Partially_agree	Partially_agree	Agree	Agree	Agree	Partially_disagree	Yes	Yes	Yes	Yes	Yes
18	Very_confident	Human_activity	Strongly_agree	Disagree	Strongly_agree	Strongly_agree	Strongly_disagree	Very_high	Very_high	Very_high	Very_high	Moderate	High	High	Very_high	High	High	High	High	Very_high	Yes	No	Yes	Yes	No	Yes	No	Mostly_negative	Strongly_agree	Agree	Strongly_agree	Strongly_disagree	Unsure	Mostly_negative	Strongly_agree	Strongly_agree	Strongly_agree	Unsure	Strongly_agree	Unsure	Strongly_agree	Agree	Strongly_agree	Disagree	Yes	Yes	Yes	Yes	Yes
19	Fairly_confident	A_combination	Unsure	Partially_agree	Agree	Unsure	Unsure	Moderate	High	Moderate	High	High	High	Moderate	Moderate	High	High	High	Moderate	High	Yes	No	No	Yes	No	Don’t_know	Yes	Mostly_negative	Agree	Agree	Agree	Disagree	Partially_disagree	Mostly_negative	Partially_agree	Agree	Agree	Unsure	Partially_disagree	Partially_agree	Unsure	Unsure	Partially_agree	Partially_agree	Yes	Yes	Yes	I_don’t_know	I_don’t_know
20	Fairly_confident	A_combination	Unsure	Strongly_agree	Partially_disagree	Partially_disagree	Strongly_agree	Moderate	Moderate	Moderate	Moderate	Moderate	Moderate	Moderate	High	Moderate	High	Moderate	Low	High	Yes	No	No	Yes	No	No	No	No_impact	Agree	Partially_agree	Partially_agree	Unsure	Unsure	No_impact	Partially_agree	Partially_agree	Partially_disagree	Disagree	Partially_agree	Partially_agree	Agree	Agree	Agree	Unsure	Yes	Yes	Yes	No	Yes
21	Not_confident_at_all	A_combination	Disagree	Partially_disagree	Unsure	Disagree	Disagree	Moderate	Moderate	Moderate	Moderate	Moderate	Moderate	Moderate	Moderate	Moderate	Moderate	Moderate	Moderate	Moderate	No	No	No	No	No	No	No	No_impact	Agree	Unsure	Agree	Unsure	Disagree	No_impact	Agree	Unsure	Unsure	Disagree	Unsure	Unsure	Agree	Agree	Agree	Disagree	No	Yes	Yes	Yes	No
22	Very_confident	Human_activity	Agree	Disagree	Disagree	Disagree	Strongly_disagree	High	High	High	High	High	Don’t_know	High	Don’t_know	Don’t_know	Don’t_know	Don’t_know	Don’t_know	Don’t_know	No	No	No	No	No	No	No	No_impact	Strongly_agree	Unsure	Disagree	Unsure	Disagree	Negative	Unsure	Agree	Partially_agree	Partially_agree	Partially_agree	Agree	Unsure	Unsure	Partially_disagree	Unsure	Yes	Yes	Yes	Yes	Yes
23	Not_too_confident	Not_sure	Partially_disagree	Partially_disagree	Partially_disagree	Unsure	Unsure	Don’t_know	Don’t_know	Don’t_know	Don’t_know	Don’t_know	Don’t_know	Don’t_know	Don’t_know	Don’t_know	Don’t_know	Don’t_know	Don’t_know	Don’t_know	No	No	No	No	No	No	No	No_impact	Agree	Unsure	Unsure	Disagree	Disagree	NoAnswer	Unsure	Unsure	Unsure	Unsure	Unsure	Unsure	Partially_disagree	Unsure	Unsure	Unsure	I_don’t_know	I_don’t_know	I_don’t_know	I_don’t_know	I_don’t_know
24	Very_confident	Human_activity	Strongly_agree	Disagree	Agree	Partially_agree	Strongly_disagree	Very_high	Moderate	High	Very_high	Very_high	Very_high	Very_high	Very_high	Very_high	High	High	High	Very_high	Yes	No	Yes	No	No	No	No	Mostly_negative	Strongly_agree	Agree	Strongly_agree	Disagree	Unsure	Negative	Agree	Agree	Agree	Disagree	Unsure	Agree	Partially_disagree	Strongly_disagree	Unsure	Partially_disagree	Yes	No	I_don’t_know	Yes	Yes
25	Not_confident_at_all	A_combination	Agree	Partially_agree	Partially_disagree	Disagree	Partially_agree	High	High	High	High	Very_high	Moderate	Low	Moderate	Moderate	Low	High	Low	High	Yes	No	No	No	No	No	No	No_impact	Agree	Agree	Partially_disagree	Strongly_disagree	Partially_disagree	No_impact	Partially_agree	Partially_disagree	Disagree	Partially_agree	Partially_agree	Disagree	Strongly_agree	Agree	Agree	Partially_agree	No	No	Yes	No	Yes
26	Very_confident	Human_activity	Strongly_agree	Partially_agree	Agree	Agree	Disagree	Very_high	Very_high	Very_high	Very_high	Very_high	Don’t_know	Very_high	Very_high	Very_high	Very_high	Very_high	Don’t_know	Very_high	No	No	No	Yes	No	No	Yes	No_impact	Agree	Agree	Strongly_agree	Partially_agree	Unsure	Mostly_negative	Agree	Agree	Partially_agree	Unsure	Partially_disagree	Unsure	Strongly_agree	Partially_agree	Partially_agree	Unsure	No	No	Yes	No	Yes
27	Very_confident	Human_activity	Strongly_agree	Partially_agree	Strongly_agree	Agree	Strongly_disagree	Very_high	Very_high	Very_high	Very_high	High	High	Very_high	Very_high	High	Moderate	High	Moderate	High	Yes	No	Yes	Yes	No	Yes	Yes	Mostly_positive	Strongly_agree	Strongly_agree	Strongly_agree	Strongly_disagree	Disagree	Mostly_negative	Strongly_agree	Agree	Agree	Agree	Partially_agree	Agree	Agree	Partially_agree	Agree	Agree	No	Yes	I_don’t_know	I_don’t_know	No
28	Not_too_confident	Not_sure	Partially_disagree	Partially_agree	Partially_agree	Unsure	Partially_agree	Low	Low	Low	Low	Low	Low	Low	Low	Moderate	Low	Moderate	Low	Low	No	No	No	No	No	No	No	No_impact	Agree	Unsure	Unsure	Disagree	Unsure	Mostly_negative	Unsure	Partially_agree	Unsure	Partially_disagree	Partially_agree	Partially_agree	Agree	Partially_agree	Agree	Agree	No	Yes	I_don’t_know	I_don’t_know	I_don’t_know
29	Fairly_confident	A_combination	Agree	Unsure	Disagree	Partially_disagree	Agree	Low	Moderate	Moderate	Moderate	Low	Very_low	Low	Low	Low	Low	Moderate	Very_low	Low	Yes	No	No	No	No	No	No	No_impact	Partially_agree	Unsure	Disagree	Unsure	Strongly_disagree	Mostly_negative	Unsure	Unsure	Partially_disagree	Disagree	Unsure	Unsure	Partially_agree	Unsure	Unsure	Agree	No	Yes	I_don’t_know	No	I_don’t_know
30	Fairly_confident	Human_activity	Agree	Partially_agree	Agree	Agree	Partially_agree	Moderate	High	High	High	High	High	High	High	High	High	High	High	High	Yes	No	No	Yes	No	No	No	No_impact	Unsure	Disagree	Agree	Partially_disagree	Unsure	No_impact	Unsure	Agree	Partially_agree	Partially_disagree	Partially_agree	Partially_agree	Partially_agree	Partially_agree	Unsure	Unsure	No	Yes	Yes	I_don’t_know	Yes
31	Not_confident_at_all	Natural_patterns	Agree	Partially_agree	Strongly_disagree	Strongly_disagree	Agree	Very_low	Very_low	Very_low	Very_low	Very_low	Very_low	Very_low	Very_low	Very_low	Very_low	Very_low	Very_low	Very_low	No	No	No	No	No	No	No	No_impact	Disagree	Strongly_disagree	Strongly_disagree	Strongly_disagree	Strongly_disagree	No_impact	Strongly_disagree	Strongly_disagree	Strongly_disagree	Unsure	Partially_agree	Strongly_disagree	Agree	Disagree	Strongly_disagree	Partially_agree	No	Yes	Yes	I_don’t_know	I_don’t_know
32	Not_too_confident	Natural_patterns	Partially_disagree	Disagree	Agree	Agree	Partially_agree	Moderate	Low	Moderate	High	Moderate	Moderate	Moderate	High	NoAnswer	Low	High	NoAnswer	Moderate	Yes	No	Yes	Yes	No	Yes	No	Mostly_positive	Strongly_disagree	Agree	Agree	Strongly_disagree	Partially_agree	Mostly_negative	NoAnswer	Unsure	Agree	Disagree	Strongly_disagree	Unsure	Partially_disagree	Agree	Disagree	Agree	No	No	Yes	Yes	Yes
33	Not_confident_at_all	Natural_patterns	Unsure	Strongly_agree	Disagree	Strongly_disagree	Agree	Low	Low	Moderate	Moderate	Very_low	Moderate	Low	Don’t_know	Don’t_know	Very_low	Low	Don’t_know	Moderate	No	No	No	No	No	No	No	No_impact	Agree	Disagree	Disagree	Disagree	Disagree	No_impact	Partially_disagree	Partially_disagree	Partially_disagree	Disagree	Disagree	Unsure	Strongly_agree	Agree	Agree	Agree	Yes	I_don’t_know	Yes	Yes	Yes
34	Very_confident	Human_activity	Agree	Strongly_disagree	Strongly_agree	Partially_agree	Strongly_disagree	High	High	High	High	High	Don’t_know	High	High	High	High	High	High	High	No	No	No	No	No	No	No	No_impact	Strongly_agree	Strongly_agree	Strongly_agree	Strongly_disagree	Disagree	Negative	Agree	Agree	Agree	Disagree	Disagree	Unsure	Strongly_disagree	Unsure	Partially_agree	Partially_agree	I_don’t_know	I_don’t_know	I_don’t_know	Yes	I_don’t_know
35	Very_confident	Human_activity	Agree	Disagree	Agree	Agree	Disagree	Very_high	Very_high	Very_high	Very_high	Very_high	High	Very_high	Very_high	Very_high	Very_high	Very_high	High	Very_high	Yes	No	Yes	Yes	No	No	No	Mostly_negative	Agree	Agree	Agree	Strongly_disagree	Agree	Mostly_negative	Agree	Agree	Agree	Partially_agree	Partially_disagree	Partially_agree	Disagree	Unsure	Partially_agree	Partially_agree	No	Yes	Yes	Yes	Yes
36	Very_confident	A_combination	Strongly_agree	Strongly_disagree	Agree	Unsure	Strongly_disagree	Very_high	Very_high	High	Very_high	Very_high	Very_high	Very_high	Very_high	High	High	High	High	High	No	No	Don’t_know	Yes	No	No	Don’t_know	No_impact	Partially_agree	Agree	Agree	Agree	Strongly_agree	Mostly_negative	Strongly_agree	Strongly_agree	Strongly_agree	Partially_disagree	Partially_disagree	Unsure	Strongly_agree	Unsure	Agree	Partially_disagree	Yes	Yes	Yes	No	No
37	Fairly_confident	Human_activity	Agree	Disagree	Agree	Partially_agree	Partially_disagree	High	High	High	High	Moderate	Moderate	High	High	Low	Low	High	Low	Don’t_know	Yes	No	No	Yes	No	No	No	Mostly_negative	Partially_agree	Partially_agree	Partially_agree	Partially_disagree	Unsure	Mostly_negative	Partially_agree	Partially_agree	Partially_agree	Unsure	Unsure	Unsure	Partially_agree	Partially_agree	Agree	Agree	No	Yes	I_don’t_know	Yes	Yes
38	Fairly_confident	A_combination	Agree	Unsure	Partially_agree	Partially_agree	Partially_agree	Moderate	Don’t_know	Don’t_know	Don’t_know	Don’t_know	Moderate	Don’t_know	Moderate	Don’t_know	Don’t_know	Don’t_know	Don’t_know	Don’t_know	Yes	No	Yes	Yes	No	Yes	Yes	No_impact	Agree	Partially_agree	Partially_agree	Disagree	Unsure	Mostly_positive	Unsure	Unsure	Agree	Partially_disagree	Disagree	Agree	Agree	Partially_agree	Agree	Agree	I_don’t_know	Yes	Yes	Yes	Yes
39	Fairly_confident	Natural_patterns	Unsure	Partially_disagree	Agree	Partially_agree	Unsure	Moderate	High	High	High	High	Moderate	High	Very_high	High	Moderate	Moderate	Moderate	Very_high	Yes	No	Yes	No	No	Yes	Yes	No_impact	Agree	Agree	Agree	Unsure	Partially_disagree	No_impact	Agree	Strongly_agree	Partially_agree	Agree	Partially_agree	Strongly_agree	Partially_agree	Partially_agree	Agree	Agree	Yes	No	Yes	I_don’t_know	I_don’t_know
40	Fairly_confident	Natural_patterns	Partially_agree	Agree	Unsure	Disagree	Agree	Very_low	Very_low	Very_low	Very_low	Very_low	Very_low	Very_low	Very_low	Very_low	Very_low	Very_low	Very_low	Very_low	Yes	No	No	No	No	No	No	No_impact	Agree	Disagree	Disagree	Disagree	Disagree	No_impact	Disagree	Disagree	Disagree	Disagree	Partially_agree	Unsure	Strongly_agree	Unsure	Strongly_agree	Agree	No	Yes	Yes	No	No
41	Very_confident	Human_activity	Strongly_agree	Disagree	Strongly_agree	Strongly_agree	Disagree	Very_high	Very_high	Don’t_know	High	High	Very_high	Very_high	Very_high	Very_high	Don’t_know	High	Don’t_know	Very_high	No	No	No	Yes	No	No	No	Mostly_negative	Strongly_agree	Strongly_agree	Strongly_agree	Strongly_disagree	Agree	Mostly_negative	Strongly_agree	Strongly_agree	Strongly_agree	Unsure	Unsure	Agree	Partially_disagree	Agree	Agree	Agree	Yes	Yes	Yes	I_don’t_know	Yes
42	Fairly_confident	Natural_patterns	Unsure	Partially_disagree	Partially_agree	Partially_agree	Unsure	Don’t_know	Don’t_know	Don’t_know	Don’t_know	Don’t_know	Don’t_know	Don’t_know	Don’t_know	Don’t_know	Don’t_know	Don’t_know	Don’t_know	Don’t_know	No	No	No	No	No	Yes	No	Mostly_negative	Strongly_agree	Partially_agree	Partially_agree	Strongly_disagree	Disagree	No_impact	Unsure	Partially_agree	Unsure	Unsure	Partially_agree	Unsure	Partially_agree	Unsure	Partially_agree	Partially_agree	I_don’t_know	No	No	Yes	Yes
43	Fairly_confident	A_combination	Agree	Agree	Partially_agree	Strongly_disagree	Strongly_agree	High	Don’t_know	Don’t_know	Don’t_know	Don’t_know	Don’t_know	Moderate	Moderate	Don’t_know	Low	Don’t_know	Very_low	Low	No	No	No	No	No	No	No	No_impact	Strongly_agree	Partially_disagree	Disagree	Strongly_disagree	Strongly_disagree	No_impact	Partially_agree	Disagree	Disagree	Unsure	Partially_agree	Unsure	Agree	Partially_agree	Partially_agree	Partially_agree	No	Yes	Yes	No	I_don’t_know
44	Very_confident	Human_activity	Strongly_agree	Disagree	Strongly_agree	Strongly_agree	Strongly_disagree	Very_high	Low	Moderate	Very_high	Very_high	Very_high	Very_high	Very_high	Very_high	Very_high	Very_high	Very_high	Very_high	Don’t_know	Don’t_know	Yes	Don’t_know	No	Yes	No	Negative	Strongly_agree	Strongly_agree	Strongly_agree	Strongly_disagree	Strongly_disagree	Mostly_negative	Agree	Agree	Strongly_agree	Disagree	Disagree	Strongly_agree	Partially_agree	Unsure	Strongly_agree	Partially_agree	I_don’t_know	I_don’t_know	I_don’t_know	No	Yes
45	Very_confident	Human_activity	Agree	Disagree	Strongly_agree	Agree	Disagree	High	High	High	High	High	High	High	High	High	High	High	High	Moderate	Yes	No	Yes	Yes	No	Yes	Yes	NoAnswer	Strongly_agree	Agree	Unsure	Disagree	Unsure	Mostly_negative	Agree	Agree	Unsure	Partially_agree	Partially_agree	Partially_agree	Agree	Partially_agree	Partially_agree	Unsure	No	No	Yes	No	I_don’t_know
46	Fairly_confident	A_combination	Agree	Partially_agree	Partially_agree	Unsure	Unsure	High	High	Moderate	High	High	High	High	Moderate	Moderate	Moderate	High	Moderate	High	No	No	No	No	No	No	No	No_impact	Partially_agree	Partially_agree	Agree	Partially_agree	Partially_disagree	No_impact	Agree	Agree	Partially_agree	Unsure	Agree	Agree	Unsure	Agree	Agree	Partially_agree	Yes	Yes	Yes	I_don’t_know	I_don’t_know
47	Very_confident	Human_activity	Partially_agree	Disagree	Partially_agree	Unsure	Strongly_disagree	Very_high	Very_high	Very_high	Very_high	Moderate	Very_high	Moderate	Moderate	High	High	High	High	Moderate	Don’t_know	No	No	Yes	No	No	No	No_impact	Strongly_agree	Unsure	Unsure	Partially_disagree	Unsure	Mostly_negative	Partially_agree	Partially_agree	Partially_agree	Strongly_agree	Disagree	Agree	Partially_agree	Unsure	Agree	Strongly_agree	No	Yes	I_don't_know	Yes	Yes
48	Fairly_confident	Not_confident_at_all	Partially_agree	Unsure	Unsure	Partially_agree	Disagree	High	Moderate	Low	High	High	Moderate	High	High	High	Moderate	Very_high	Moderate	Moderate	No	No	Don’t_know	No	No	No	No	No_impact	Agree	Agree	Agree	Strongly_disagree	Unsure	Negative	Agree	Agree	Agree	Disagree	Disagree	Agree	Agree	Partially_disagree	Partially_agree	Unsure	Yes	Yes	Yes	I_don’t_know	I_don’t_know
49	Very_confident	Human_activity	Agree	Strongly_disagree	Partially_agree	Agree	Strongly_disagree	Very_high	High	High	Very_high	Very_high	Very_high	Very_high	High	High	Moderate	High	Don’t_know	High	Yes	No	Don’t_know	No	No	No	No	Mostly_negative	Agree	Partially_agree	Agree	Strongly_disagree	Unsure	Mostly_negative	Agree	Agree	Agree	Unsure	Disagree	Agree	Strongly_agree	Partially_agree	Strongly_agree	Strongly_agree	Yes	Yes	Yes	Yes	I_don’t_know
50	Very_confident	Human_activity	Agree	Partially_disagree	Agree	Agree	Disagree	High	High	High	High	Moderate	High	Moderate	High	High	High	High	Moderate	High	NoAnswer	NoAnswer	NoAnswer	Yes	NoAnswer	NoAnswer	Yes	No_impact	Agree	Strongly_agree	Agree	Disagree	Disagree	Mostly_negative	Strongly_agree	Agree	Unsure	Unsure	Partially_agree	Partially_agree	Agree	Partially_agree	Agree	Partially_disagree	No	Yes	Yes	No	No
51	Very_confident	A_combination	Partially_agree	Agree	Unsure	Unsure	Agree	Moderate	Moderate	Moderate	Moderate	Moderate	Moderate	Moderate	Moderate	Moderate	Moderate	Moderate	Moderate	Moderate	Yes	No	Don’t_know	No	No	Don’t_know	No	Mostly_negative	Agree	Agree	Agree	Disagree	Disagree	Mostly_negative	Agree	Agree	Disagree	Unsure	Unsure	Partially_agree	Agree	Partially_agree	Disagree	Agree	Yes	Yes	I_don’t_know	No	Yes
52	Fairly_confident	A_combination	Partially_agree	Unsure	Partially_agree	Unsure	Partially_agree	Moderate	Moderate	High	Moderate	Low	Low	Moderate	Moderate	Low	Moderate	Moderate	Low	Low	No	No	No	No	No	Yes	No	Mostly_positive	Strongly_agree	Unsure	Unsure	Partially_disagree	Partially_disagree	No_impact	Partially_disagree	Partially_agree	Unsure	Partially_disagree	Partially_agree	Partially_agree	Partially_disagree	Partially_agree	Partially_disagree	Partially_agree	I_don’t_know	Yes	I_don’t_know	No	NoAnswer
53	Very_confident	A_combination	Agree	Unsure	Partially_agree	Agree	Partially_disagree	High	High	High	High	High	Very_high	Don’t_know	High	Very_high	Don’t_know	Don’t_know	Don’t_know	High	Yes	No	No	Yes	No	No	No	No_impact	Agree	Partially_agree	Strongly_agree	Disagree	Partially_agree	Mostly_positive	Unsure	Agree	Unsure	Partially_agree	Partially_agree	Agree	Agree	Agree	Agree	Agree	No	Yes	I_don’t_know	No	Yes
54	Very_confident	Human_activity	Strongly_agree	Strongly_disagree	Agree	Agree	Unsure	Very_high	Very_high	Very_high	Very_high	Low	High	High	Very_high	Very_high	High	Moderate	Very_high	Very_high	No	No	No	No	No	No	No	No_impact	Strongly_agree	Agree	Strongly_agree	Strongly_disagree	Strongly_disagree	Mostly_negative	Strongly_agree	Strongly_agree	Strongly_agree	Agree	Agree	Agree	Strongly_agree	Strongly_agree	Strongly_agree	Strongly_disagree	No	Yes	Yes	I_don’t_know	I_don’t_know
55	Not_too_confident	Natural_patterns	Agree	Unsure	Strongly_disagree	Strongly_disagree	Agree	Low	Low	Low	Low	Low	Low	Low	Low	Low	Low	Low	Low	Low	No	No	No	No	No	No	No	No_impact	Agree	Disagree	Disagree	Disagree	Strongly_disagree	No_impact	Disagree	Disagree	Disagree	Disagree	Disagree	Disagree	Agree	Partially_disagree	Disagree	Unsure	No	No	Yes	No	No
56	Not_confident_at_all	A_combination	Agree	Agree	Disagree	Disagree	Agree	Moderate	Moderate	Moderate	Low	Low	Moderate	Moderate	Low	Moderate	Moderate	Moderate	Moderate	Moderate	No	No	No	Yes	No	No	No	Positive	Strongly_agree	Disagree	Partially_disagree	Partially_agree	Disagree	No_impact	Unsure	Unsure	Unsure	Partially_disagree	Unsure	Disagree	Strongly_agree	Unsure	Agree	Unsure	No	No	Yes	Yes	No
57	Not_too_confident	Natural_patterns	Partially_agree	Agree	Partially_agree	Partially_agree	Strongly_agree	Low	Low	Low	Moderate	High	Very_low	Low	Moderate	Moderate	High	Moderate	Low	Low	No	No	No	No	No	No	No	Mostly_positive	Agree	Partially_disagree	Partially_disagree	Agree	Disagree	Mostly_positive	Unsure	Partially_disagree	Disagree	Disagree	Disagree	Strongly_agree	Strongly_agree	Strongly_agree	Strongly_agree	Strongly_disagree	Yes	Yes	Yes	Yes	Yes
58	Very_confident	A_combination	Partially_agree	Disagree	Agree	Agree	Strongly_disagree	Very_high	Very_high	High	High	High	Very_high	High	High	High	High	High	High	Don’t_know	No	No	No	No	No	No	No	No_impact	Agree	Agree	Agree	Disagree	Unsure	Mostly_negative	Agree	Agree	Agree	Unsure	Unsure	Agree	Disagree	Unsure	Agree	Disagree	Yes	Yes	Yes	Yes	I_don’t_know
59	Fairly_confident	A_combination	Unsure	Agree	Agree	Partially_agree	Partially_disagree	High	High	High	High	High	High	Moderate	Moderate	Moderate	High	High	High	Moderate	No	No	No	No	No	No	Yes	No_impact	Partially_disagree	Unsure	Partially_agree	Agree	Disagree	No_impact	Partially_agree	Partially_agree	Partially_disagree	Partially_disagree	Unsure	Agree	Disagree	Partially_agree	Agree	Partially_agree	I_don’t_know	Yes	Yes	Yes	Yes
60	Not_too_confident	A_combination	Agree	Agree	Unsure	Partially_disagree	Agree	Moderate	Moderate	Moderate	Moderate	Moderate	Moderate	Moderate	Moderate	Moderate	Moderate	Moderate	Moderate	Moderate	No	No	Don’t_know	No	No	No	Don’t_know	NoAnswer	Unsure	Unsure	Partially_disagree	Partially_agree	Disagree	No_impact	Disagree	Unsure	Partially_disagree	Unsure	Partially_agree	Partially_disagree	Partially_disagree	Partially_disagree	Unsure	Agree	I_don’t_know	I_don’t_know	I_don’t_know	Yes	I_don’t_know
61	Fairly_confident	A_combination	Unsure	Partially_disagree	Partially_agree	Unsure	Partially_agree	Moderate	Low	Low	Moderate	Low	Moderate	Moderate	High	Moderate	Moderate	Moderate	Low	Low	No	No	No	No	No	Yes	Yes	No_impact	Agree	Agree	Agree	Disagree	Partially_disagree	Mostly_negative	Agree	Agree	Agree	Disagree	Disagree	Agree	Agree	Unsure	Agree	Agree	No	Yes	Yes	Yes	Yes
62	Very_confident	Human_activity	Strongly_agree	Disagree	Strongly_agree	Agree	Strongly_disagree	Very_high	Very_high	Moderate	Very_high	Very_high	Very_high	Very_high	Very_high	Very_high	High	Very_high	Don’t_know	High	Yes	Don’t_know	Don’t_know	Yes	No	Don’t_know	Don’t_know	No_impact	Agree	Agree	Unsure	Disagree	Disagree	Mostly_positive	Agree	Partially_agree	Unsure	Partially_disagree	Partially_agree	Agree	Partially_agree	Partially_disagree	Agree	Partially_disagree	Yes	Yes	Yes	Yes	Yes
63	Not_too_confident	A_combination	Unsure	Partially_agree	Unsure	Partially_disagree	Agree	Don’t_know	Don’t_know	Don’t_know	Don’t_know	Don’t_know	Don’t_know	Don’t_know	Don’t_know	Don’t_know	Don’t_know	Don’t_know	Don’t_know	Don’t_know	Yes	No	Yes	Don’t_know	No	No	No	No_impact	Unsure	Partially_agree	Unsure	Partially_disagree	Disagree	No_impact	Unsure	Partially_agree	Unsure	Strongly_disagree	Unsure	Unsure	Partially_agree	Disagree	Disagree	Partially_agree	Yes	Yes	I_don’t_know	No	Yes
64	Very_confident	Human_activity	Agree	Partially_disagree	Agree	Agree	Disagree	High	High	High	High	Moderate	Moderate	High	High	High	High	High	High	High	Yes	Don’t_know	Don’t_know	Yes	Don’t_know	Don’t_know	Don’t_know	Mostly_negative	Agree	Unsure	Unsure	Disagree	Unsure	Mostly_negative	Unsure	Agree	Agree	Partially_disagree	Partially_disagree	Agree	Agree	Unsure	Unsure	Partially_agree	I_don’t_know	I_don’t_know	I_don’t_know	I_don’t_know	No
65	Very_confident	A_combination	Partially_agree	Partially_disagree	Agree	Agree	Disagree	Very_high	Very_high	Very_high	Very_high	Very_high	Very_high	High	High	High	High	Very_high	High	High	No	No	Don’t_know	No	No	No	No	Mostly_positive	Strongly_agree	Agree	Agree	Unsure	Disagree	Mostly_negative	Partially_agree	Partially_agree	Unsure	Disagree	Disagree	Agree	Partially_agree	Unsure	Agree	Partially_disagree	No	Yes	No	I_don't_know	Yes
66	Fairly_confident	NoAnswer	NoAnswer	NoAnswer	NoAnswer	NoAnswer	NoAnswer	NoAnswer	NoAnswer	NoAnswer	NoAnswer	NoAnswer	NoAnswer	NoAnswer	NoAnswer	NoAnswer	NoAnswer	NoAnswer	NoAnswer	NoAnswer	Yes	Don’t_know	No	Yes	No	No	No	Mostly_positive	Strongly_agree	Agree	Partially_agree	Agree	Disagree	Mostly_positive	Agree	Unsure	Unsure	Partially_agree	Disagree	Unsure	Agree	Partially_agree	Agree	Partially_agree	Yes	Yes	Yes	Yes	I_don't_know
67	Not_confident_at_all	Natural_patterns	Strongly_agree	Strongly_agree	Partially_disagree	Disagree	Strongly_agree	Low	Low	Low	Low	Moderate	Low	Low	Very_low	Low	Low	Low	Low	Low	Yes	No	No	Yes	No	No	No	No_impact	Strongly_agree	Disagree	Disagree	Partially_disagree	Strongly_disagree	No_impact	Disagree	Disagree	Strongly_disagree	Partially_agree	Agree	Unsure	Strongly_agree	Partially_agree	Disagree	Disagree	No	Yes	Yes	Yes	No
68	Fairly_confident	Human_activity	Partially_agree	Disagree	Partially_agree	Unsure	Disagree	High	High	High	High	High	Moderate	High	High	High	High	High	High	High	Yes	Yes	No	No	No	No	No	Mostly_positive	Agree	Partially_agree	Partially_agree	Partially_disagree	Unsure	Negative	Agree	Agree	Agree	Partially_agree	Strongly_agree	Strongly_agree	Partially_agree	Partially_agree	Strongly_agree	Partially_disagree	I_don’t_know	Yes	Yes	Yes	I_don’t_know
69	Not_too_confident	A_combination	Agree	Unsure	Disagree	Disagree	Agree	Don’t_know	Don’t_know	Don’t_know	Don’t_know	Don’t_know	Don’t_know	Don’t_know	Don’t_know	Don’t_know	Don’t_know	Don’t_know	Don’t_know	Don’t_know	No	No	No	No	No	No	No	No_impact	Agree	Strongly_disagree	Strongly_disagree	Agree	Strongly_disagree	No_impact	Disagree	Strongly_disagree	Strongly_disagree	Unsure	Unsure	Unsure	Strongly_agree	Partially_agree	Agree	Agree	No	Yes	Yes	No	No
70	Very_confident	Human_activity	Agree	Disagree	Strongly_agree	Agree	Strongly_disagree	Very_high	Very_high	Very_high	High	Very_high	High	Very_high	Very_high	Very_high	Very_high	Very_high	Very_high	Very_high	Yes	NoAnswer	NoAnswer	Yes	NoAnswer	NoAnswer	NoAnswer	Mostly_positive	Strongly_agree	Strongly_agree	Strongly_agree	Disagree	Agree	Mostly_negative	Strongly_agree	Strongly_agree	Strongly_agree	Strongly_disagree	Disagree	Strongly_agree	Partially_agree	Unsure	Strongly_agree	Disagree	No	Yes	Yes	Yes	No
71	Fairly_confident	A_combination	Partially_agree	Partially_agree	Partially_agree	Partially_agree	Unsure	Moderate	High	Moderate	Moderate	Moderate	Moderate	Moderate	High	High	Moderate	High	Moderate	High	Don’t_know	Don’t_know	Don’t_know	Yes	No	No	No	No_impact	Agree	Disagree	Disagree	Partially_agree	Unsure	No_impact	Partially_agree	Unsure	Partially_agree	Disagree	Unsure	Agree	Partially_disagree	Unsure	Unsure	Agree	I_don't_know	I_don't_know	Yes	Yes	I_don't_know
72	Very_confident	Human_activity	Agree	Partially_agree	Unsure	Strongly_agree	Strongly_disagree	Very_high	High	High	High	High	High	Very_high	High	High	High	Very_high	Don’t_know	Very_high	No	No	No	No	No	No	No	No_impact	Strongly_agree	Unsure	Unsure	Disagree	Disagree	Mostly_positive	Partially_agree	Partially_agree	Partially_agree	Partially_agree	Agree	Unsure	Partially_disagree	Partially_disagree	Disagree	Partially_agree	No	I_don’t_know	I_don’t_know	Yes	Yes
73	Very_confident	Human_activity	Agree	Disagree	Agree	Partially_agree	Disagree	Very_high	Very_high	Very_high	High	High	High	Very_high	High	Very_high	High	Very_high	High	High	No	Don’t_know	No	No	No	Don’t_know	No	No_impact	Strongly_agree	Strongly_agree	Unsure	Unsure	Disagree	Mostly_negative	Strongly_agree	Agree	Agree	Partially_agree	Disagree	Agree	Partially_disagree	Partially_disagree	Partially_agree	Partially_agree	Yes	No	Yes	No	No
74	Fairly_confident	Human_activity	Agree	Disagree	Partially_agree	Agree	Disagree	Very_high	High	Very_high	Very_high	Very_high	Very_high	High	Very_high	Very_high	Very_high	Very_high	High	Don’t_know	No	No	No	No	No	No	No	No_impact	Strongly_agree	Agree	Unsure	Partially_agree	Disagree	Mostly_negative	Strongly_agree	Partially_agree	Partially_agree	Disagree	Disagree	Strongly_agree	Agree	Partially_agree	Agree	Partially_agree	No	No	Yes	Yes	Yes
75	Fairly_confident	Human_activity	Agree	Agree	Agree	Partially_agree	Partially_agree	Very_high	High	Moderate	Moderate	High	Very_high	NoAnswer	Very_high	Very_high	High	Very_high	Moderate	Moderate	Yes	No	Yes	Yes	No	No	Yes	No_impact	Agree	Agree	Agree	Partially_disagree	Unsure	NoAnswer	Unsure	Unsure	Agree	Disagree	Agree	Agree	Agree	Agree	Agree	Agree	Yes	Yes	Yes	Yes	Yes
76	Fairly_confident	A_combination	Partially_agree	Agree	Unsure	Unsure	Agree	Moderate	Moderate	Moderate	Moderate	Moderate	Moderate	Moderate	Moderate	Moderate	Moderate	Moderate	Moderate	Moderate	No	No	No	No	No	No	No	No_impact	Strongly_agree	Partially_agree	Partially_agree	Strongly_disagree	Disagree	No_impact	Unsure	Partially_agree	Partially_agree	Unsure	Partially_agree	Partially_agree	Partially_agree	Partially_agree	Partially_agree	Partially_agree	Yes	Yes	Yes	No	Yes
77	Very_confident	NoAnswer	NoAnswer	NoAnswer	NoAnswer	NoAnswer	NoAnswer	NoAnswer	NoAnswer	NoAnswer	NoAnswer	NoAnswer	NoAnswer	NoAnswer	NoAnswer	NoAnswer	NoAnswer	NoAnswer	NoAnswer	NoAnswer	Yes	No	No	No	No	Yes	Yes	Positive	Strongly_disagree	Strongly_agree	Unsure	Disagree	Unsure	Positive	Agree	Unsure	Partially_disagree	Disagree	Partially_disagree	Agree	Agree	Partially_agree	Unsure	Disagree	I_don't_know	Yes	Yes	Yes	No
78	NoAnswer	Natural_patterns	Unsure	Partially_agree	Disagree	Partially_disagree	Partially_agree	Moderate	Moderate	Moderate	Moderate	Moderate	Moderate	Moderate	Moderate	Moderate	Moderate	Moderate	Moderate	Low	No	No	No	No	No	No	No	Mostly_positive	Partially_agree	Disagree	Disagree	Partially_agree	Disagree	No_impact	Partially_disagree	Disagree	Disagree	Partially_disagree	Partially_agree	Disagree	Agree	Agree	Partially_disagree	Agree	Yes	Yes	I_don’t_know	I_don’t_know	I_don’t_know
79	Not_too_confident	A_combination	Unsure	Agree	Partially_agree	Agree	Unsure	Low	Moderate	Moderate	Moderate	Moderate	Moderate	Moderate	Low	Moderate	Moderate	Moderate	Moderate	Low	Yes	No	No	No	No	No	No	Mostly_positive	Agree	Partially_agree	Partially_agree	Disagree	Disagree	No_impact	Unsure	Partially_agree	Agree	Disagree	Partially_disagree	Partially_agree	Agree	Unsure	Partially_agree	Unsure	I_don’t_know	Yes	Yes	Yes	Yes
80	Fairly_confident	A_combination	Partially_agree	Partially_disagree	Partially_agree	Unsure	Partially_agree	High	Moderate	High	Moderate	Moderate	Moderate	High	Moderate	Moderate	Moderate	Moderate	Moderate	Moderate	No	No	Don’t_know	Yes	No	No	No	No_impact	Strongly_agree	Partially_disagree	Partially_disagree	Disagree	Unsure	No_impact	Partially_disagree	Partially_agree	Unsure	Disagree	Disagree	Partially_agree	Partially_agree	Partially_agree	Partially_agree	Partially_agree	I_don't_know	I_don't_know	Yes	I_don't_know	I_don't_know
81	Very_confident	Human_activity	Strongly_agree	Disagree	Disagree	Unsure	Strongly_disagree	Very_high	High	Moderate	Low	Low	Moderate	Moderate	Moderate	Don’t_know	Don’t_know	Don’t_know	Don’t_know	Moderate	No	No	No	No	No	No	No	Mostly_negative	Strongly_agree	Strongly_agree	Strongly_agree	Strongly_disagree	Partially_disagree	Mostly_negative	Agree	Strongly_agree	Strongly_agree	Agree	Agree	Strongly_agree	Partially_agree	Unsure	Unsure	Unsure	I_don’t_know	I_don’t_know	I_don’t_know	I_don’t_know	I_don’t_know
82	Fairly_confident	Natural_patterns	Partially_agree	Disagree	Agree	Partially_agree	Disagree	Moderate	High	Moderate	Low	Low	Low	Moderate	High	High	High	High	Moderate	High	Yes	No	Yes	Yes	No	No	No	No_impact	Agree	Agree	Partially_agree	Disagree	Unsure	Mostly_positive	Partially_agree	Disagree	Agree	Unsure	Partially_agree	Partially_disagree	Agree	Strongly_agree	Strongly_agree	Strongly_agree	No	Yes	Yes	Yes	I_don’t_know
83	Very_confident	Human_activity	Agree	Unsure	Agree	Agree	Disagree	Very_high	High	Moderate	Very_high	Very_high	High	High	High	High	High	Very_high	High	High	No	No	Yes	Yes	No	No	No	Mostly_negative	Agree	Partially_agree	Partially_agree	Disagree	Unsure	Mostly_negative	Partially_agree	Agree	Agree	Disagree	Disagree	Agree	Strongly_disagree	Disagree	Partially_agree	Partially_agree	No	No	I_don’t_know	I_don’t_know	Yes
84	Very_confident	Human_activity	Agree	Partially_disagree	Strongly_agree	Strongly_agree	Disagree	Very_high	Very_high	Moderate	High	Low	High	Very_high	Very_high	Very_high	High	Very_high	Moderate	Moderate	No	No	No	No	No	No	No	No_impact	Strongly_agree	Partially_agree	Strongly_agree	Disagree	Unsure	Mostly_positive	Strongly_agree	Strongly_agree	Strongly_agree	Partially_agree	Partially_agree	Agree	Partially_agree	Partially_agree	Partially_agree	Unsure	No	No	Yes	Yes	I_don’t_know
85	Very_confident	Human_activity	Strongly_agree	Strongly_disagree	Agree	Agree	Disagree	High	Moderate	Moderate	High	High	High	Very_high	High	Very_high	High	High	Moderate	Moderate	Yes	No	No	Yes	No	No	No	NoAnswer	Agree	Partially_agree	Partially_agree	Partially_disagree	Unsure	Mostly_negative	Agree	Agree	Agree	Disagree	Partially_disagree	Agree	Partially_agree	Unsure	Partially_agree	Partially_agree	I_don’t_know	I_don’t_know	I_don’t_know	Yes	Yes
86	Very_confident	Human_activity	Strongly_agree	Disagree	Agree	Disagree	Strongly_disagree	Very_high	Very_high	Moderate	High	High	High	Very_high	High	High	High	High	High	High	No	No	No	No	No	No	No	Mostly_negative	Strongly_agree	Agree	Agree	Disagree	Disagree	Mostly_negative	Agree	Agree	Agree	Partially_agree	Partially_disagree	Partially_agree	Partially_agree	Unsure	Partially_agree	Partially_disagree	No	Yes	Yes	Yes	No
87	Fairly_confident	Human_activity	Partially_agree	Partially_agree	Agree	Partially_agree	Disagree	High	High	Moderate	Moderate	Low	Very_high	Moderate	Moderate	Moderate	Moderate	Moderate	Moderate	High	No	No	Yes	No	No	Yes	Yes	No_impact	Partially_agree	Partially_disagree	Partially_agree	Disagree	Partially_agree	Mostly_negative	Partially_disagree	Partially_agree	Partially_agree	Unsure	Partially_disagree	Unsure	Disagree	Partially_disagree	Unsure	Partially_disagree	No	I_don’t_know	Yes	No	Yes
88	Fairly_confident	A_combination	Partially_agree	Unsure	Partially_disagree	Unsure	Partially_agree	Moderate	Moderate	Moderate	Moderate	Moderate	Moderate	High	High	High	Moderate	High	Moderate	High	No	No	No	No	No	No	No	Mostly_negative	Agree	Agree	Strongly_agree	Strongly_disagree	Disagree	Negative	Agree	Agree	Agree	Disagree	Agree	Agree	Partially_agree	Partially_agree	Strongly_disagree	Unsure	I_don’t_know	Yes	Yes	Yes	Yes
89	Not_too_confident	Natural_patterns	Agree	Agree	Partially_agree	Partially_agree	Strongly_agree	Moderate	Moderate	Moderate	Moderate	Moderate	Moderate	Moderate	Moderate	Moderate	Moderate	Moderate	Moderate	Moderate	Yes	No	No	No	No	No	No	Positive	Unsure	Unsure	Unsure	Unsure	Partially_disagree	Positive	Unsure	Unsure	Unsure	Partially_disagree	Partially_disagree	Partially_disagree	Unsure	Unsure	Partially_agree	Partially_agree	No	No	No	No	Yes
90	Not_too_confident	A_combination	Partially_agree	Agree	Partially_disagree	Partially_disagree	Partially_agree	High	High	Moderate	Moderate	Moderate	Moderate	Moderate	Moderate	Moderate	Moderate	Moderate	Low	Moderate	Yes	No	No	Yes	No	No	No	No_impact	Agree	Disagree	Partially_disagree	Agree	Disagree	No_impact	Unsure	Unsure	Disagree	Disagree	Disagree	Partially_agree	Agree	Unsure	Agree	Unsure	No	Yes	No	No	No
91	Very_confident	Human_activity	Agree	Strongly_disagree	Strongly_agree	Disagree	Strongly_disagree	Very_high	Don’t_know	Don’t_know	Don’t_know	Don’t_know	Very_high	Very_high	Very_high	Very_high	Don’t_know	Very_high	Don’t_know	Don’t_know	No	No	No	No	No	Yes	No	Mostly_positive	Strongly_agree	Strongly_agree	Strongly_agree	Disagree	Disagree	NoAnswer	Strongly_agree	Strongly_agree	Strongly_agree	Strongly_disagree	Disagree	Agree	Disagree	Disagree	Unsure	Agree	I_don’t_know	I_don’t_know	Yes	I_don’t_know	I_don’t_know
92	Not_confident_at_all	Refused	Strongly_agree	Strongly_agree	Strongly_disagree	Strongly_agree	Strongly_agree	Low	Low	Low	Low	Low	Moderate	NoAnswer	Moderate	Low	Low	Low	Low	Low	No	No	No	No	No	No	No	No_impact	Strongly_agree	Disagree	Disagree	Disagree	Strongly_disagree	No_impact	Disagree	Disagree	Disagree	Disagree	Disagree	Disagree	Agree	Disagree	Agree	Partially_agree	No	No	No	No	No
93	Very_confident	A_combination	Strongly_agree	Strongly_disagree	Strongly_agree	Strongly_agree	Strongly_disagree	Very_high	Very_high	Very_high	Very_high	High	High	Very_high	Very_high	High	High	Very_high	High	Very_high	No	No	No	Yes	No	No	No	No_impact	Strongly_agree	Strongly_disagree	Strongly_disagree	Partially_agree	Partially_agree	Mostly_negative	Strongly_agree	Strongly_agree	Unsure	Agree	Disagree	Strongly_agree	Agree	Partially_agree	Strongly_agree	Disagree	I_don’t_know	Yes	Yes	Yes	Yes
94	Very_confident	Human_activity	Strongly_agree	Strongly_disagree	Strongly_agree	Strongly_agree	Strongly_disagree	Very_high	Very_high	Moderate	Low	Low	High	High	Very_high	Very_high	Moderate	Moderate	Low	Very_high	No	No	No	Yes	No	No	No	No_impact	Strongly_agree	Agree	Partially_agree	Strongly_disagree	Partially_disagree	Mostly_negative	Agree	Strongly_agree	Strongly_agree	Strongly_disagree	Disagree	Agree	Disagree	Disagree	Partially_agree	Agree	No	Yes	No	Yes	I_don’t_know
95	Fairly_confident	A_combination	Unsure	Unsure	Partially_agree	Partially_agree	Unsure	High	Moderate	Moderate	High	Moderate	Moderate	High	Moderate	Moderate	Moderate	Moderate	Moderate	Moderate	Yes	No	No	No	No	No	No	Mostly_negative	Unsure	Partially_agree	Partially_agree	Partially_disagree	Unsure	Mostly_negative	Unsure	Unsure	Unsure	Unsure	Unsure	Partially_agree	Unsure	Partially_disagree	Unsure	Unsure	Yes	No	Yes	I_don’t_know	No
96	Fairly_confident	Human_activity	Agree	Partially_agree	Agree	Agree	Partially_disagree	High	High	Very_high	Very_high	Moderate	Very_high	High	High	High	High	Very_high	High	High	Yes	No	Yes	Yes	No	Yes	No	Mostly_positive	Strongly_agree	Partially_agree	Strongly_agree	Partially_disagree	Partially_agree	No_impact	Unsure	Unsure	Unsure	Strongly_disagree	Partially_disagree	Partially_agree	Strongly_disagree	Partially_agree	Strongly_agree	Strongly_disagree	Yes	Yes	Yes	Yes	Yes
97	Very_confident	NoAnswer	NoAnswer	NoAnswer	NoAnswer	NoAnswer	NoAnswer	NoAnswer	NoAnswer	NoAnswer	NoAnswer	NoAnswer	NoAnswer	NoAnswer	NoAnswer	NoAnswer	NoAnswer	NoAnswer	NoAnswer	NoAnswer	Yes	No	No	Yes	No	No	No	No_impact	Strongly_agree	Partially_agree	Agree	Unsure	Partially_agree	Mostly_negative	Partially_agree	Partially_agree	Unsure	Partially_disagree	Disagree	Unsure	Partially_disagree	Partially_disagree	Partially_agree	Partially_disagree	No	Yes	I_don't_know	Yes	Yes
98	Very_confident	A_combination	Partially_agree	Agree	Partially_agree	Unsure	Unsure	High	High	Moderate	Moderate	Moderate	Moderate	Moderate	Moderate	Moderate	Moderate	Moderate	Moderate	Moderate	No	No	No	Yes	No	No	No	No_impact	Strongly_agree	Agree	Agree	Agree	Unsure	Mostly_negative	Agree	Unsure	Unsure	Unsure	Partially_agree	Partially_agree	Agree	Agree	Agree	Partially_agree	I_don’t_know	Yes	Yes	Yes	Yes
99	Fairly_confident	Human_activity	Unsure	Disagree	Agree	Agree	Strongly_disagree	High	High	High	High	High	High	High	High	High	High	High	Moderate	High	Yes	No	No	Yes	No	No	No	No_impact	Strongly_agree	Unsure	Agree	Disagree	Unsure	Mostly_negative	Unsure	Agree	Agree	Disagree	Agree	Agree	Partially_agree	Agree	Agree	Strongly_agree	No	Yes	Yes	Yes	Yes
100	Fairly_confident	A_combination	Partially_agree	Agree	Partially_agree	Partially_agree	Unsure	Don’t_know	Don’t_know	Don’t_know	Don’t_know	Don’t_know	Don’t_know	Don’t_know	Don’t_know	Don’t_know	Don’t_know	Don’t_know	Don’t_know	Don’t_know	No	No	No	No	No	No	No	No_impact	Agree	Disagree	Disagree	Disagree	Disagree	No_impact	Unsure	Unsure	Unsure	Partially_disagree	Disagree	Disagree	Partially_agree	Unsure	Partially_agree	Agree	Yes	I_don’t_know	I_don’t_know	No	No
101	Very_confident	Human_activity	Disagree	Partially_agree	Agree	Unsure	Unsure	High	High	High	High	Moderate	Very_high	High	High	High	Low	Moderate	Moderate	Don’t_know	No	Don’t_know	Don’t_know	Don’t_know	No	Yes	Don’t_know	No_impact	Strongly_agree	Unsure	Unsure	Disagree	Disagree	Mostly_negative	Agree	Agree	Unsure	Partially_agree	Strongly_agree	Partially_agree	Agree	Unsure	Strongly_agree	Agree	No	Yes	Yes	I_don’t_know	I_don’t_know
102	Fairly_confident	A_combination	Agree	Partially_disagree	Agree	Agree	Partially_disagree	Very_high	Very_high	Moderate	Moderate	Low	High	High	High	Moderate	Low	Moderate	Low	Moderate	No	No	No	Yes	No	No	No	No_impact	Agree	Partially_agree	Unsure	Unsure	Disagree	No_impact	Agree	Partially_agree	Disagree	Partially_disagree	Unsure	Partially_agree	Agree	Partially_agree	Agree	Agree	No	Yes	Yes	Yes	Yes
103	Fairly_confident	A_combination	Agree	Agree	Partially_agree	Disagree	Agree	Moderate	Moderate	Moderate	Moderate	Low	Low	Moderate	Low	Moderate	Low	Moderate	Low	Low	Yes	No	No	Yes	No	No	No	No_impact	Strongly_agree	Partially_agree	Partially_agree	Agree	Strongly_disagree	No_impact	Disagree	Partially_disagree	Disagree	Agree	Agree	Partially_agree	Strongly_agree	Agree	Strongly_agree	Agree	No	Yes	Yes	Yes	No
104	Fairly_confident	A_combination	Unsure	Partially_agree	Unsure	Unsure	Unsure	Moderate	High	Moderate	High	High	High	Moderate	Moderate	Moderate	Moderate	Moderate	Moderate	Moderate	No	No	Don’t_know	No	No	No	No	No_impact	Partially_agree	Partially_agree	Partially_agree	Partially_disagree	Partially_disagree	No_impact	Partially_agree	Partially_agree	Unsure	Partially_agree	Unsure	Partially_agree	Unsure	Unsure	Unsure	Partially_agree	Yes	I_don’t_know	Yes	I_don’t_know	Yes
105	Not_too_confident	A_combination	Unsure	Unsure	Disagree	Unsure	Partially_agree	Low	Moderate	Moderate	Moderate	Moderate	Low	Moderate	Moderate	Moderate	Low	Moderate	Moderate	Low	No	No	No	No	No	No	No	No_impact	Strongly_agree	Strongly_agree	Strongly_agree	Partially_agree	Disagree	No_impact	Partially_agree	Partially_agree	Partially_agree	Disagree	Disagree	Partially_agree	Strongly_agree	Partially_agree	Partially_agree	Partially_agree	Yes	Yes	I_don’t_know	Yes	I_don’t_know
106	Fairly_confident	A_combination	Partially_agree	Partially_agree	Unsure	Disagree	Agree	Moderate	Moderate	Moderate	High	High	High	Moderate	Moderate	Moderate	Low	Low	Low	High	Don’t_know	Don’t_know	Don’t_know	Don’t_know	No	No	No	Mostly_positive	Agree	Unsure	Partially_agree	Disagree	Disagree	Mostly_negative	Partially_agree	Partially_agree	Unsure	Disagree	Disagree	Agree	Partially_agree	Unsure	Unsure	Agree	Yes	Yes	Yes	Yes	I_don’t_know
107	Very_confident	A_combination	Strongly_agree	Partially_agree	Strongly_agree	Strongly_agree	Disagree	Very_high	Very_high	High	High	Don’t_know	High	Very_high	Very_high	Very_high	Don’t_know	High	High	Very_high	No	No	No	Yes	No	No	Don’t_know	Mostly_positive	Agree	Partially_agree	Partially_agree	Partially_disagree	Unsure	No_impact	Agree	Partially_agree	Partially_disagree	Unsure	Unsure	Unsure	Partially_agree	Partially_disagree	Partially_disagree	Partially_agree	I_don’t_know	Yes	Yes	I_don’t_know	I_don’t_know
108	Fairly_confident	A_combination	Agree	Disagree	Agree	Strongly_agree	Disagree	High	High	High	High	High	High	High	High	High	Moderate	High	Moderate	Moderate	No	No	No	Yes	No	No	No	No_impact	Strongly_agree	Agree	Agree	Disagree	Disagree	Mostly_negative	Partially_agree	Partially_agree	Partially_disagree	Partially_agree	Partially_disagree	Agree	Strongly_agree	Agree	Agree	Agree	No	Yes	Yes	Yes	I_don’t_know
109	Not_too_confident	Natural_patterns	Agree	Agree	Disagree	Disagree	Agree	Low	Low	Low	Low	Moderate	Low	Low	Low	Low	Low	Low	Low	Low	No	No	No	No	No	No	No	No_impact	Agree	Disagree	Partially_disagree	Disagree	Disagree	No_impact	Disagree	Disagree	Disagree	Unsure	Partially_disagree	Disagree	Partially_agree	Partially_disagree	Partially_agree	Agree	Yes	Yes	Yes	I_don’t_know	No
110	Fairly_confident	Human_activity	Agree	Partially_disagree	Agree	Partially_agree	Disagree	High	High	High	High	High	High	High	High	High	High	High	High	High	No	No	No	Yes	No	No	No	No_impact	Agree	Partially_agree	Agree	Disagree	Partially_agree	Mostly_negative	Partially_agree	Agree	Agree	Partially_disagree	Disagree	Agree	Partially_agree	Disagree	Agree	Partially_agree	No	Yes	Yes	Yes	I_don’t_know
111	Fairly_confident	A_combination	Partially_disagree	Partially_agree	Agree	Unsure	Partially_agree	High	High	High	High	Very_high	Very_high	Very_high	High	High	Moderate	High	High	Very_high	No	No	Yes	Yes	No	No	Yes	Mostly_negative	Agree	Partially_agree	Agree	Partially_disagree	Partially_agree	Mostly_negative	Agree	Agree	Partially_agree	Unsure	Partially_agree	Strongly_agree	Strongly_agree	Unsure	Strongly_agree	Agree	Yes	Yes	Yes	Yes	Yes
112	Not_confident_at_all	Not_sure	Partially_disagree	Strongly_agree	Disagree	Strongly_disagree	Strongly_agree	Moderate	Moderate	Moderate	Very_high	Moderate	Moderate	Moderate	Moderate	Moderate	Moderate	Moderate	Moderate	Moderate	Yes	No	No	Yes	No	Yes	No	No_impact	Strongly_agree	Disagree	Disagree	Agree	Disagree	No_impact	Disagree	Disagree	Disagree	Agree	Agree	Disagree	Agree	Agree	Agree	Agree	Yes	Yes	Yes	Yes	I_don’t_know
113	Fairly_confident	A_combination	Agree	Agree	Disagree	Disagree	Agree	High	Moderate	Moderate	Moderate	Moderate	Moderate	Moderate	Moderate	Moderate	Moderate	Moderate	Low	Low	No	No	No	No	No	No	No	No_impact	Partially_agree	Partially_disagree	Disagree	Strongly_disagree	Disagree	No_impact	Partially_disagree	Partially_disagree	Disagree	Unsure	Partially_disagree	Partially_disagree	Strongly_agree	Agree	Agree	Strongly_agree	Yes	Yes	Yes	Yes	Yes
114	Not_too_confident	Natural_patterns	Agree	Unsure	Unsure	Unsure	Partially_disagree	Low	Low	Low	Low	Moderate	Moderate	Moderate	Moderate	Moderate	Low	Moderate	Low	Moderate	Yes	No	No	No	No	No	No	Mostly_negative	Agree	Partially_agree	Unsure	Strongly_disagree	Disagree	Mostly_negative	Unsure	Partially_agree	Unsure	Partially_disagree	Partially_agree	Partially_agree	Partially_agree	Unsure	Agree	Agree	No	Yes	Yes	Yes	No
115	Fairly_confident	A_combination	Agree	Unsure	Agree	Agree	Unsure	Moderate	High	Moderate	Moderate	Low	Don’t_know	Moderate	High	Moderate	Moderate	Moderate	Moderate	High	No	No	No	Yes	No	No	Don’t_know	Mostly_negative	Strongly_agree	Agree	Agree	Disagree	Unsure	Mostly_negative	Partially_agree	Agree	Agree	Unsure	Unsure	Partially_disagree	Agree	Agree	Agree	Agree	No	Yes	Yes	No	I_don’t_know
116	Fairly_confident	Natural_patterns	Agree	Strongly_agree	Strongly_disagree	Strongly_disagree	Strongly_agree	Low	Low	Moderate	Low	Low	Moderate	Low	Low	Moderate	Low	Low	Low	Low	Yes	No	No	No	No	No	No	No_impact	Strongly_agree	Strongly_disagree	Strongly_disagree	Strongly_disagree	Strongly_disagree	No_impact	Strongly_disagree	Partially_disagree	Strongly_disagree	Agree	Agree	Partially_disagree	Strongly_agree	Partially_agree	Partially_agree	Agree	No	Yes	I_don’t_know	No	Yes
117	Very_confident	Human_activity	Agree	Unsure	Agree	Partially_agree	Disagree	High	High	High	High	High	High	High	High	High	High	High	High	High	No	No	Don’t_know	Yes	No	No	Yes	No_impact	Strongly_agree	Partially_agree	Partially_agree	Disagree	Unsure	NoAnswer	Agree	Partially_agree	Partially_agree	Disagree	Disagree	Partially_agree	Agree	Unsure	Agree	Partially_agree	Yes	Yes	Yes	I_don’t_know	I_don’t_know
118	Not_sure	A_combination	Unsure	Strongly_agree	Partially_agree	Partially_agree	Strongly_agree	Moderate	Moderate	Moderate	Moderate	Low	Moderate	Low	Moderate	Moderate	Moderate	Low	Moderate	Moderate	No	No	No	No	No	No	No	Mostly_positive	Strongly_agree	Agree	Agree	Strongly_disagree	Strongly_disagree	No_impact	Unsure	Unsure	Unsure	Unsure	Unsure	Unsure	Strongly_agree	Strongly_agree	Strongly_agree	Strongly_disagree	I_don’t_know	No	I_don’t_know	I_don’t_know	I_don’t_know
119	Fairly_confident	A_combination	Partially_agree	Agree	Agree	Agree	Partially_disagree	Moderate	Moderate	High	Moderate	Moderate	Moderate	Very_high	Very_high	Very_high	Moderate	Moderate	Low	Very_high	Yes	No	Don’t_know	No	No	No	No	Mostly_negative	Strongly_agree	Agree	Partially_agree	Disagree	Strongly_disagree	Mostly_negative	Agree	Agree	Agree	Unsure	Partially_agree	Partially_agree	Strongly_agree	Unsure	Agree	Agree	Yes	Yes	Yes	I_don’t_know	I_don’t_know
120	Very_confident	Human_activity	Agree	Partially_agree	Partially_agree	Agree	Disagree	Very_high	Very_high	Very_high	High	Very_high	Very_high	Very_high	Very_high	Very_high	Very_high	Very_high	Very_high	Very_high	Yes	No	No	Yes	No	Yes	Yes	Mostly_negative	Strongly_agree	Agree	Agree	Disagree	Unsure	Mostly_negative	Agree	Agree	Agree	Disagree	Disagree	Strongly_agree	Agree	Unsure	Agree	Disagree	Yes	Yes	Yes	I_don’t_know	I_don’t_know
121	Very_confident	Human_activity	Agree	Disagree	Agree	Agree	Disagree	Very_high	Very_high	Moderate	High	Low	Moderate	Very_high	Very_high	Very_high	Very_high	Moderate	Moderate	Moderate	No	No	No	Yes	No	No	No	Positive	Agree	Agree	Agree	Disagree	Disagree	Mostly_negative	Agree	Agree	Agree	Disagree	Partially_agree	Agree	Agree	Partially_agree	Agree	Partially_agree	No	Yes	I_don’t_know	Yes	Yes
122	Very_confident	A_combination	Agree	Disagree	Agree	Agree	Strongly_disagree	High	Very_high	Very_high	Very_high	High	Don’t_know	Don’t_know	Very_high	Don’t_know	Don’t_know	High	High	High	No	No	Don’t_know	No	No	No	No	No_impact	Strongly_agree	Partially_agree	Agree	Disagree	Disagree	NoAnswer	Partially_agree	Strongly_agree	Strongly_agree	Unsure	Unsure	Unsure	Partially_agree	Agree	Partially_agree	Unsure	Yes	Yes	I_don’t_know	Yes	I_don’t_know
123	Very_confident	A_combination	Agree	Strongly_disagree	Strongly_agree	Strongly_agree	Strongly_disagree	High	High	Don’t_know	Very_high	High	High	Very_high	Very_high	High	Don’t_know	High	High	Don’t_know	No	No	No	Yes	No	No	Yes	Mostly_negative	Strongly_agree	Strongly_agree	Partially_agree	Disagree	Unsure	Mostly_negative	Agree	Agree	Partially_agree	Disagree	Partially_disagree	Unsure	Disagree	Partially_agree	Partially_disagree	Unsure	No	Yes	Yes	Yes	I_don’t_know
124	Very_confident	Human_activity	Agree	Disagree	Disagree	Partially_disagree	Strongly_disagree	Very_high	Very_high	Very_high	High	Very_high	Very_high	High	Moderate	Very_high	High	High	High	Very_high	No	No	No	No	No	Don’t_know	No	Mostly_positive	Strongly_agree	Disagree	Disagree	Partially_disagree	Partially_agree	Mostly_positive	Partially_disagree	Partially_disagree	Partially_disagree	Disagree	Disagree	Agree	Agree	Agree	Agree	Disagree	No	Yes	No	Yes	Yes
125	Not_too_confident	A_combination	Agree	Agree	Unsure	Partially_agree	Agree	Moderate	Moderate	Moderate	Moderate	Moderate	Moderate	High	Moderate	Moderate	Moderate	Moderate	Moderate	Moderate	Yes	No	No	No	No	No	No	Positive	Strongly_agree	Agree	Disagree	Strongly_disagree	NoAnswer	Mostly_positive	Unsure	Partially_disagree	Partially_disagree	Disagree	Disagree	Partially_agree	Agree	Agree	Disagree	Partially_agree	Yes	Yes	No	Yes	Yes
126	Fairly_confident	NoAnswer	NoAnswer	NoAnswer	NoAnswer	NoAnswer	NoAnswer	NoAnswer	NoAnswer	NoAnswer	NoAnswer	NoAnswer	NoAnswer	NoAnswer	NoAnswer	NoAnswer	NoAnswer	NoAnswer	NoAnswer	NoAnswer	No	No	No	No	No	No	No	No_impact	Agree	Disagree	Unsure	Agree	Partially_agree	No_impact	Unsure	Partially_agree	Disagree	Disagree	Unsure	Agree	Agree	Partially_agree	Agree	Partially_disagree	I_don't_know	Yes	No	I_don't_know	I_don't_know
127	Fairly_confident	A_combination	Unsure	Partially_disagree	Agree	Partially_agree	Unsure	Moderate	High	High	Moderate	Moderate	High	High	High	Very_high	High	High	High	Moderate	Yes	No	No	Yes	No	Yes	Yes	Mostly_positive	Agree	Partially_agree	Partially_agree	Unsure	Partially_agree	No_impact	Unsure	Partially_agree	Partially_agree	Disagree	Partially_disagree	Agree	Partially_agree	Unsure	Partially_agree	Partially_disagree	Yes	Yes	No	Yes	I_don't_know
128	Not_too_confident	Natural_patterns	Partially_agree	Agree	Disagree	Unsure	Agree	Moderate	Moderate	Moderate	Moderate	Low	Moderate	Moderate	High	Moderate	Moderate	Moderate	Moderate	Moderate	No	No	No	No	No	No	No	No_impact	Agree	Unsure	NoAnswer	Disagree	Disagree	No_impact	Unsure	Unsure	Unsure	Unsure	Partially_disagree	Partially_agree	Agree	Agree	Unsure	Agree	No	Yes	Yes	Yes	Yes
129	Very_confident	Human_activity	Agree	Partially_agree	Strongly_agree	Strongly_agree	Disagree	High	High	High	High	High	High	High	High	High	High	High	High	High	Yes	No	No	Yes	No	No	No	Mostly_positive	Strongly_agree	Strongly_agree	Partially_disagree	Partially_disagree	Unsure	Mostly_positive	Agree	Partially_disagree	Partially_agree	Partially_agree	Unsure	Strongly_agree	Agree	Agree	Strongly_agree	Unsure	No	Yes	Yes	I_don't_know	Yes
130	Not_too_confident	Natural_patterns	Agree	Agree	Partially_agree	Unsure	Strongly_agree	Moderate	Moderate	Moderate	Moderate	Moderate	Moderate	Moderate	Moderate	Moderate	Moderate	Moderate	Moderate	Moderate	Yes	No	No	No	No	No	No	Mostly_positive	Strongly_agree	Unsure	Agree	Disagree	Disagree	Mostly_positive	Unsure	Unsure	Unsure	Strongly_disagree	Strongly_disagree	Unsure	Agree	Strongly_agree	Unsure	NoAnswer	Yes	Yes	No	No	Yes
131	Very_confident	Human_activity	Partially_disagree	Partially_agree	Agree	Agree	Partially_agree	Very_high	High	Very_high	Very_high	High	Very_high	Very_high	Very_high	Very_high	Moderate	Very_high	High	High	No	No	No	No	No	No	No	Mostly_positive	Strongly_agree	Agree	Unsure	Strongly_agree	Unsure	Positive	Strongly_agree	Unsure	Disagree	Unsure	Strongly_agree	Disagree	Strongly_agree	Strongly_agree	Strongly_agree	Partially_agree	No	No	Yes	No	Yes
132	Fairly_confident	Human_activity	Partially_disagree	Partially_agree	Partially_agree	Agree	Disagree	Moderate	High	High	Low	Low	High	High	High	High	High	Moderate	High	High	No	NoAnswer	Yes	No	NoAnswer	NoAnswer	No	Positive	Disagree	Unsure	Disagree	Partially_disagree	Partially_disagree	Mostly_positive	Disagree	Unsure	Partially_agree	NoAnswer	NoAnswer	NoAnswer	NoAnswer	NoAnswer	NoAnswer	NoAnswer	NoAnswer	NoAnswer	NoAnswer	NoAnswer	NoAnswer
133	Not_too_confident	A_combination	Unsure	Partially_agree	Partially_disagree	Disagree	Partially_agree	Moderate	Low	Low	Moderate	Moderate	Moderate	Low	Moderate	High	Low	Moderate	Low	Low	Yes	No	No	Yes	No	No	No	No_impact	Agree	Unsure	Unsure	Partially_disagree	Disagree	No_impact	Unsure	Partially_disagree	Partially_disagree	Disagree	Unsure	Unsure	Strongly_agree	Agree	Partially_disagree	Agree	No	Yes	Yes	I_don’t_know	Yes
134	Very_confident	A_combination	Strongly_agree	Partially_disagree	Strongly_agree	Strongly_agree	Strongly_disagree	Very_high	Very_high	Very_high	Very_high	Very_high	Very_high	Very_high	Very_high	Very_high	Very_high	Very_high	Very_high	Very_high	Yes	No	Yes	Yes	No	Yes	No	Mostly_negative	Strongly_agree	Strongly_agree	Strongly_agree	Strongly_disagree	Partially_disagree	Mostly_negative	Strongly_agree	Strongly_agree	Strongly_agree	Partially_disagree	Agree	Strongly_agree	Strongly_agree	Strongly_agree	Strongly_agree	Partially_agree	Yes	Yes	Yes	Yes	Yes
135	Very_confident	Human_activity	Strongly_agree	Strongly_disagree	Strongly_agree	Strongly_agree	Disagree	Very_high	Very_high	Moderate	Very_high	Moderate	Moderate	High	Very_high	Very_high	High	High	Moderate	High	Yes	No	No	Yes	No	No	Yes	No_impact	Strongly_agree	Strongly_agree	Strongly_agree	Partially_disagree	Partially_agree	No_impact	Strongly_agree	Agree	Partially_agree	Agree	Disagree	Disagree	Strongly_agree	Disagree	Partially_disagree	Partially_agree	No	Yes	Yes	No	I_don't_know
136	Very_confident	Human_activity	Agree	Disagree	Strongly_agree	Agree	Strongly_disagree	Very_high	Very_high	Very_high	Very_high	High	Very_high	Very_high	Very_high	Very_high	Very_high	Very_high	Very_high	Very_high	Yes	No	Yes	Yes	No	No	No	Mostly_positive	Strongly_agree	Agree	Agree	Disagree	Disagree	Mostly_negative	Agree	Agree	Partially_agree	Agree	Disagree	Agree	Agree	Disagree	Agree	Disagree	No	I_don't_know	Yes	I_don't_know	No
137	Very_confident	Human_activity	Strongly_agree	Disagree	Agree	Agree	Strongly_disagree	High	High	Very_high	High	Moderate	High	Moderate	Moderate	High	High	High	High	Moderate	Yes	No	No	Yes	No	Yes	No	Mostly_positive	Strongly_agree	Agree	Unsure	Unsure	Partially_agree	Mostly_positive	Agree	Unsure	Unsure	Agree	Strongly_agree	Partially_agree	Agree	Agree	Agree	Unsure	No	Yes	Yes	Yes	Yes
138	Fairly_confident	A_combination	Partially_disagree	Agree	Agree	Unsure	NoAnswer	Moderate	Moderate	High	High	High	High	High	High	High	Very_high	Very_high	High	Very_high	Yes	Don’t_know	Don’t_know	Yes	No	No	No	No_impact	Agree	Unsure	Agree	Partially_disagree	Partially_agree	Mostly_negative	Agree	Agree	NoAnswer	Partially_agree	Disagree	Agree	Unsure	Unsure	Partially_agree	Partially_agree	Yes	I_don't_know	Yes	Yes	Yes
139	Fairly_confident	Human_activity	Disagree	Partially_disagree	Disagree	Unsure	Disagree	Very_high	Very_high	Moderate	Very_high	Very_high	Very_high	Moderate	High	Moderate	High	Moderate	High	Low	No	No	Yes	No	No	No	No	Mostly_positive	Strongly_agree	Disagree	Disagree	Disagree	Disagree	Mostly_negative	Partially_agree	Partially_agree	Disagree	Unsure	Unsure	Unsure	Disagree	Unsure	Disagree	Disagree	Yes	Yes	Yes	Yes	Yes
140	Not_too_confident	A_combination	Partially_agree	Partially_agree	Partially_disagree	Partially_disagree	Partially_disagree	Moderate	Moderate	Moderate	Moderate	Moderate	Moderate	Moderate	Moderate	Moderate	Moderate	Moderate	Moderate	Moderate	Yes	No	No	No	No	Yes	No	Mostly_negative	Partially_agree	Partially_disagree	Partially_disagree	Partially_agree	Partially_disagree	Mostly_positive	Partially_disagree	Partially_agree	Partially_disagree	Partially_disagree	Partially_disagree	Partially_agree	Partially_agree	Partially_agree	Partially_agree	Partially_disagree	No	Yes	No	No	Yes
141	Very_confident	NoAnswer	NoAnswer	NoAnswer	NoAnswer	NoAnswer	NoAnswer	NoAnswer	NoAnswer	NoAnswer	NoAnswer	NoAnswer	NoAnswer	NoAnswer	NoAnswer	NoAnswer	NoAnswer	NoAnswer	NoAnswer	NoAnswer	No	Yes	No	No	No	Don’t_know	No	No_impact	Strongly_agree	Strongly_agree	Agree	Disagree	Unsure	Mostly_negative	Strongly_agree	Agree	Partially_agree	Disagree	Partially_agree	Agree	Agree	Unsure	Agree	Disagree	No	No	Yes	Yes	I_don't_know
142	Fairly_confident	A_combination	Partially_agree	Agree	Agree	Agree	Agree	High	Moderate	High	High	High	High	Moderate	Moderate	High	Moderate	High	Moderate	Moderate	Yes	No	No	Yes	No	No	No	Mostly_positive	Agree	Agree	Agree	Unsure	Agree	Mostly_negative	Agree	Agree	Agree	Partially_disagree	Disagree	Agree	Unsure	Agree	Partially_agree	Partially_agree	Yes	No	Yes	Yes	No
143	Very_confident	A_combination	Unsure	Disagree	Disagree	Disagree	Agree	Moderate	Low	Low	Moderate	Moderate	Moderate	Moderate	High	Moderate	Low	Moderate	Moderate	High	No	No	No	No	No	No	No	Mostly_positive	Strongly_agree	Partially_disagree	Partially_disagree	Unsure	Disagree	Mostly_positive	Partially_disagree	Partially_agree	Disagree	Unsure	Disagree	Disagree	Partially_disagree	Unsure	Agree	Unsure	No	No	Yes	No	No
144	Very_confident	Human_activity	Agree	Disagree	Strongly_agree	Strongly_agree	Disagree	Very_high	High	High	Low	Low	High	High	Very_high	Very_high	High	Very_high	Moderate	Moderate	No	No	No	No	No	Yes	No	Mostly_positive	Agree	Partially_agree	Unsure	Unsure	Strongly_disagree	Positive	Agree	Partially_agree	Partially_agree	Disagree	Disagree	Partially_agree	Agree	Unsure	Agree	Strongly_disagree	No	Yes	Yes	Yes	Yes
145	Very_confident	Human_activity	Partially_agree	Partially_disagree	Unsure	Unsure	Disagree	Very_high	High	High	High	High	High	High	High	High	High	High	Moderate	High	Don’t_know	Don’t_know	Don’t_know	Don’t_know	No	Don’t_know	Don’t_know	NoAnswer	Strongly_agree	Agree	Partially_agree	Disagree	Unsure	NoAnswer	Agree	Partially_agree	Partially_agree	Strongly_agree	Strongly_agree	Agree	Partially_agree	Disagree	Unsure	Partially_disagree	No	No	Yes	I_don't_know	Yes
146	Very_confident	Human_activity	Agree	Partially_disagree	Strongly_agree	Strongly_agree	Disagree	Very_high	Very_high	Very_high	Very_high	Don’t_know	Very_high	Very_high	Very_high	Very_high	Very_high	Very_high	Very_high	Very_high	Yes	No	No	Yes	No	No	Yes	Mostly_negative	Agree	Agree	Agree	Strongly_disagree	Unsure	Mostly_negative	Agree	Agree	Agree	Unsure	Unsure	Partially_agree	Partially_agree	Unsure	Agree	Disagree	Yes	I_don't_know	Yes	I_don't_know	Yes
147	Very_confident	Human_activity	Strongly_agree	Disagree	Agree	Partially_agree	Disagree	Very_high	High	High	Low	High	Moderate	High	Very_high	Very_high	Moderate	Moderate	Moderate	High	Don’t_know	Don’t_know	Don’t_know	Don’t_know	Don’t_know	Don’t_know	Don’t_know	Mostly_negative	Strongly_agree	Agree	Agree	Disagree	Unsure	Mostly_negative	Partially_disagree	Agree	Agree	Unsure	Disagree	Agree	Partially_agree	Unsure	Partially_agree	Partially_disagree	Yes	Yes	No	I_don't_know	I_don't_know
148	Very_confident	Human_activity	Agree	Strongly_agree	Unsure	Strongly_agree	Strongly_disagree	Very_high	Very_high	High	Moderate	Moderate	High	Very_high	High	Very_high	Very_high	Very_high	High	Moderate	No	No	No	Yes	No	Yes	No	Mostly_positive	Unsure	Unsure	Partially_agree	Strongly_agree	Unsure	Mostly_negative	Agree	Unsure	Unsure	Unsure	Unsure	Agree	Partially_agree	Partially_agree	Agree	Unsure	No	Yes	No	No	No
149	Not_too_confident	Not_sure	Unsure	Partially_agree	Disagree	Strongly_disagree	Strongly_agree	Low	Low	Low	Low	Low	Moderate	Low	Low	Low	Low	Low	Low	Low	No	No	No	No	No	No	No	No_impact	Agree	Strongly_disagree	Strongly_disagree	Strongly_disagree	Strongly_disagree	No_impact	Unsure	Unsure	Strongly_disagree	Strongly_agree	Unsure	Unsure	Agree	Unsure	Agree	Strongly_agree	No	No	No	Yes	No
150	Fairly_confident	A_combination	Agree	Partially_disagree	Partially_agree	Partially_agree	Partially_agree	High	High	High	High	High	High	High	High	High	High	High	High	High	Yes	Don’t_know	Don’t_know	Yes	No	Yes	No	Positive	Strongly_agree	Unsure	Partially_agree	Agree	Unsure	Mostly_positive	Partially_agree	Partially_agree	Unsure	Partially_disagree	Partially_agree	Agree	Partially_disagree	Unsure	Partially_agree	Partially_agree	Yes	Yes	I_don't_know	I_don't_know	I_don't_know
151	Very_confident	A_combination	Agree	Partially_disagree	Strongly_agree	Strongly_agree	Disagree	Very_high	High	Very_high	Moderate	High	High	Very_high	Very_high	Very_high	Very_high	Very_high	High	Very_high	Yes	No	Yes	Yes	No	Yes	No	Negative	Strongly_disagree	Agree	Strongly_agree	Strongly_disagree	Strongly_agree	Mostly_negative	Strongly_agree	Strongly_agree	Strongly_agree	Strongly_disagree	Strongly_disagree	Strongly_agree	Agree	Partially_agree	Strongly_agree	Strongly_disagree	No	I_don't_know	Yes	No	Yes
152	Fairly_confident	Natural_patterns	Unsure	Partially_agree	Agree	Agree	Agree	Moderate	High	Moderate	Low	Low	Low	Moderate	High	High	Moderate	Moderate	Low	Moderate	Yes	No	No	No	No	No	No	No_impact	Unsure	Disagree	Disagree	Partially_agree	Partially_disagree	No_impact	Agree	Disagree	Disagree	Unsure	Disagree	Partially_disagree	Partially_disagree	Disagree	Agree	Partially_disagree	No	Yes	Yes	Yes	No
153	Fairly_confident	Natural_patterns	Unsure	Partially_agree	Agree	Unsure	Unsure	Moderate	Moderate	High	Moderate	High	Moderate	High	High	High	High	Moderate	Moderate	Moderate	No	No	Don’t_know	No	No	No	Don’t_know	NoAnswer	Unsure	Unsure	Unsure	Unsure	Unsure	NoAnswer	Strongly_agree	Partially_agree	Partially_agree	Disagree	Disagree	Agree	Partially_agree	Partially_agree	Partially_agree	Unsure	I_don't_know	I_don't_know	Yes	Yes	No
154	Not_confident_at_all	A_combination	Partially_disagree	Partially_disagree	Disagree	Disagree	Agree	Low	Low	Low	Low	Low	Low	Low	Low	Moderate	Low	Low	Low	Low	No	No	No	Yes	No	No	No	No_impact	Agree	Disagree	Disagree	Disagree	Disagree	No_impact	Disagree	Disagree	Disagree	Partially_disagree	Unsure	Partially_disagree	Agree	Unsure	Partially_disagree	Unsure	No	Yes	No	Yes	No
155	Not_too_confident	NoAnswer	NoAnswer	NoAnswer	NoAnswer	NoAnswer	NoAnswer	NoAnswer	NoAnswer	NoAnswer	NoAnswer	NoAnswer	NoAnswer	NoAnswer	NoAnswer	NoAnswer	NoAnswer	NoAnswer	NoAnswer	NoAnswer	No	No	No	No	No	No	No	No_impact	Agree	Unsure	Unsure	Disagree	Disagree	No_impact	Partially_agree	Partially_agree	Partially_disagree	Strongly_disagree	Disagree	Agree	Strongly_agree	Partially_disagree	Agree	Partially_disagree	No	Yes	Yes	I_don't_know	No
156	Fairly_confident	NoAnswer	NoAnswer	NoAnswer	NoAnswer	NoAnswer	NoAnswer	NoAnswer	NoAnswer	NoAnswer	NoAnswer	NoAnswer	NoAnswer	NoAnswer	NoAnswer	NoAnswer	NoAnswer	NoAnswer	NoAnswer	NoAnswer	No	No	Yes	Yes	No	No	No	Mostly_positive	Strongly_agree	Agree	Partially_agree	Disagree	Partially_agree	Mostly_negative	Agree	Agree	Agree	Disagree	Disagree	Agree	Strongly_agree	Partially_disagree	Strongly_agree	Disagree	I_don't_know	Yes	Yes	Yes	I_don't_know
157	Not_too_confident	A_combination	Disagree	Partially_agree	Agree	Partially_agree	Agree	Moderate	Moderate	Moderate	Low	Low	Moderate	Moderate	High	Moderate	Moderate	Low	Low	Low	No	No	No	No	No	Yes	No	No_impact	Agree	Unsure	Unsure	Partially_disagree	Partially_disagree	No_impact	Unsure	Unsure	Unsure	Partially_disagree	Disagree	Partially_agree	Partially_disagree	Agree	Unsure	Agree	I_don't_know	I_don't_know	I_don't_know	I_don't_know	I_don't_know
158	Fairly_confident	A_combination	Agree	Partially_agree	Agree	Agree	Agree	High	High	High	Moderate	High	Moderate	High	High	High	High	High	Moderate	Moderate	No	No	No	Yes	No	No	No	Mostly_positive	Strongly_agree	Partially_agree	Partially_agree	Partially_agree	Disagree	Mostly_negative	Agree	Unsure	Disagree	Disagree	Disagree	Agree	Agree	Unsure	Partially_agree	Partially_disagree	No	Yes	No	Yes	I_don't_know
159	Fairly_confident	Human_activity	Strongly_agree	Disagree	Agree	Agree	Strongly_disagree	Very_high	Very_high	High	High	Very_high	High	Very_high	Very_high	Very_high	Moderate	High	Very_high	Very_high	Yes	No	No	Yes	No	Yes	Yes	Mostly_positive	Strongly_agree	Agree	Partially_agree	Agree	Strongly_agree	Positive	Strongly_agree	Strongly_agree	Unsure	Agree	Agree	Unsure	Strongly_agree	Agree	Strongly_agree	Disagree	No	Yes	No	Yes	No
160	Not_too_confident	A_combination	NoAnswer	NoAnswer	NoAnswer	NoAnswer	NoAnswer	NoAnswer	NoAnswer	NoAnswer	NoAnswer	NoAnswer	NoAnswer	NoAnswer	NoAnswer	NoAnswer	NoAnswer	NoAnswer	NoAnswer	NoAnswer	Don’t_know	No	Don’t_know	Yes	No	Don’t_know	Don’t_know	Mostly_negative	Agree	Disagree	Partially_disagree	Agree	Agree	Mostly_negative	Unsure	Unsure	Disagree	Agree	Strongly_disagree	Strongly_agree	Agree	Unsure	Strongly_agree	Unsure	No	Yes	Yes	Yes	Yes
161	Very_confident	A_combination	Partially_agree	Strongly_disagree	Agree	Agree	Disagree	Very_high	Moderate	Very_high	High	Moderate	Moderate	Very_high	Very_high	Very_high	High	High	High	Low	Yes	No	No	Yes	No	No	No	Mostly_positive	Strongly_agree	Agree	Strongly_agree	Unsure	Disagree	Negative	Agree	Unsure	Agree	Strongly_disagree	Strongly_disagree	Strongly_agree	Agree	Unsure	Strongly_agree	Strongly_disagree	No	No	No	No	Yes
162	Fairly_confident	A_combination	Agree	Partially_agree	Partially_agree	Partially_agree	Partially_agree	Moderate	High	High	High	Moderate	High	Moderate	High	High	Moderate	Moderate	High	High	Yes	No	Yes	Yes	No	Yes	Don’t_know	Mostly_negative	Agree	Agree	Agree	Disagree	Agree	Mostly_negative	Agree	Agree	Agree	Partially_disagree	Partially_agree	Partially_agree	Partially_agree	Partially_agree	Partially_agree	Partially_agree	Yes	No	Yes	Yes	Yes
163	Not_too_confident	Human_activity	Partially_disagree	Partially_disagree	Disagree	Partially_disagree	Agree	Low	Low	High	Low	High	Low	Moderate	Low	High	High	High	Moderate	Moderate	No	No	Yes	Yes	No	No	No	Mostly_positive	Agree	Disagree	Partially_disagree	Partially_agree	Agree	No_impact	Disagree	Agree	Partially_disagree	Disagree	Unsure	Agree	Partially_agree	Agree	Partially_agree	Partially_disagree	Yes	Yes	Yes	Yes	I_don't_know
164	Fairly_confident	A_combination	Partially_agree	Partially_agree	Partially_agree	Agree	Partially_disagree	High	Moderate	Moderate	Moderate	Moderate	High	Moderate	High	High	High	Moderate	Moderate	High	No	No	No	Yes	No	No	Yes	Mostly_positive	Strongly_agree	Agree	Agree	Partially_agree	Unsure	Mostly_positive	Agree	Agree	Partially_agree	Partially_agree	Partially_agree	Strongly_agree	Agree	Agree	Strongly_agree	Strongly_agree	No	I_don't_know	Yes	No	Yes
165	Not_too_confident	A_combination	Unsure	Unsure	Disagree	Partially_disagree	Partially_agree	Moderate	Moderate	Moderate	Moderate	Moderate	Moderate	Moderate	Moderate	High	Moderate	Moderate	Low	Moderate	No	No	No	No	No	No	No	No_impact	Agree	Partially_disagree	Partially_agree	Unsure	Strongly_disagree	No_impact	Partially_agree	Partially_agree	Unsure	Unsure	Unsure	Agree	Partially_agree	Partially_agree	Unsure	Partially_disagree	Yes	I_don't_know	I_don't_know	I_don't_know	No
166	Not_sure	Human_activity	Partially_agree	Disagree	Agree	Agree	Disagree	Very_high	High	High	High	High	Moderate	Moderate	High	High	High	Moderate	Moderate	High	Yes	No	Don’t_know	Yes	No	Don’t_know	No	Mostly_positive	Strongly_agree	Strongly_agree	Strongly_agree	Disagree	Unsure	Mostly_negative	Agree	Agree	Agree	Unsure	Partially_disagree	Agree	Partially_agree	Unsure	Partially_agree	Disagree	No	No	I_don't_know	Yes	I_don't_know
167	Very_confident	Human_activity	Unsure	Partially_disagree	Agree	Agree	Disagree	Very_high	High	Moderate	High	High	Very_high	Very_high	High	Very_high	Very_high	Very_high	High	High	No	No	Yes	Yes	No	Yes	Yes	No_impact	Strongly_agree	Partially_agree	Unsure	Unsure	Unsure	Mostly_positive	Agree	Partially_agree	Unsure	Disagree	Strongly_disagree	Agree	Partially_agree	Partially_agree	Agree	Strongly_disagree	Yes	No	No	No	No
168	Fairly_confident	Human_activity	Partially_disagree	Partially_disagree	Unsure	Partially_disagree	Partially_disagree	Moderate	Moderate	Moderate	Low	Moderate	Moderate	High	High	High	Moderate	High	Moderate	Moderate	No	No	No	No	No	No	No	No_impact	Agree	Unsure	Partially_disagree	Partially_disagree	Disagree	Mostly_positive	Partially_agree	Partially_agree	Partially_agree	Disagree	Disagree	Partially_agree	Disagree	Unsure	Partially_agree	Partially_agree	I_don't_know	I_don't_know	I_don't_know	Yes	I_don't_know
169	Very_confident	Human_activity	Strongly_agree	Strongly_disagree	Strongly_agree	Partially_agree	Strongly_disagree	Very_high	Don’t_know	Don’t_know	Very_high	Very_high	Very_high	Very_high	Very_high	Very_high	Don’t_know	Very_high	High	High	No	No	Don’t_know	Yes	No	No	Yes	No_impact	Strongly_agree	Agree	Agree	Agree	Unsure	Mostly_negative	Agree	Agree	Agree	Unsure	Unsure	Partially_agree	Disagree	Disagree	Strongly_disagree	Partially_disagree	Yes	I_don't_know	Yes	Yes	No
170	Very_confident	NoAnswer	NoAnswer	NoAnswer	NoAnswer	NoAnswer	NoAnswer	NoAnswer	NoAnswer	NoAnswer	NoAnswer	NoAnswer	NoAnswer	NoAnswer	NoAnswer	NoAnswer	NoAnswer	NoAnswer	NoAnswer	NoAnswer	No	No	No	No	No	No	No	Mostly_positive	Agree	Agree	Agree	Disagree	Unsure	Mostly_positive	Strongly_agree	Agree	Strongly_agree	Strongly_disagree	Disagree	Strongly_agree	Partially_agree	Unsure	Strongly_agree	Strongly_disagree	No	Yes	No	Yes	Yes
171	Very_confident	A_combination	Partially_agree	Partially_disagree	Agree	NoAnswer	Disagree	Moderate	High	High	Moderate	Moderate	High	High	Moderate	High	Moderate	High	High	High	Yes	No	No	No	No	No	No	Mostly_negative	Agree	Partially_agree	NoAnswer	Partially_agree	Disagree	Mostly_negative	Unsure	Unsure	Partially_agree	Disagree	Partially_disagree	Agree	Partially_disagree	Unsure	Disagree	Disagree	Yes	I_don't_know	I_don't_know	Yes	I_don't_know
172	Very_confident	Human_activity	Strongly_agree	Disagree	Agree	Agree	Strongly_disagree	Very_high	High	High	High	High	Very_high	High	Very_high	High	Moderate	High	High	High	No	No	No	No	No	No	Yes	No_impact	Strongly_agree	Unsure	Unsure	Disagree	Strongly_disagree	Mostly_negative	Strongly_agree	Partially_agree	Unsure	Disagree	Disagree	Agree	Disagree	Disagree	Agree	Disagree	No	I_don't_know	No	I_don't_know	I_don't_know
173	Fairly_confident	A_combination	Partially_agree	Disagree	Partially_agree	Partially_disagree	Partially_disagree	Moderate	High	High	High	High	High	High	High	High	High	High	High	High	No	No	No	Yes	No	No	No	No_impact	Strongly_agree	Partially_agree	Agree	Disagree	Partially_agree	No_impact	Agree	Agree	Agree	Disagree	Partially_disagree	Agree	Partially_disagree	Unsure	Agree	Disagree	No	No	Yes	Yes	No
174	Fairly_confident	Natural_patterns	Partially_agree	Partially_agree	Unsure	Unsure	Strongly_agree	Moderate	Moderate	Moderate	Moderate	Moderate	Moderate	High	Moderate	Moderate	Moderate	Moderate	Moderate	Moderate	No	No	No	No	No	No	No	No_impact	Disagree	Unsure	Unsure	Disagree	Disagree	No_impact	Partially_disagree	Unsure	Unsure	Unsure	Unsure	Disagree	Unsure	Unsure	Unsure	Strongly_agree	I_don't_know	No	I_don't_know	No	I_don't_know
175	Fairly_confident	Human_activity	Agree	Disagree	Agree	Partially_agree	Disagree	Very_high	High	High	Very_high	Very_high	High	Very_high	Very_high	High	High	Don’t_know	Don’t_know	High	Yes	No	No	No	No	No	Yes	No_impact	Strongly_agree	Agree	Agree	Unsure	Unsure	Mostly_negative	Agree	Agree	Agree	Partially_disagree	Partially_disagree	Agree	Agree	Partially_agree	Strongly_agree	Strongly_disagree	Yes	Yes	Yes	No	Yes
176	Fairly_confident	A_combination	Agree	Partially_disagree	Partially_agree	Partially_disagree	Disagree	High	High	High	High	High	Moderate	High	High	High	High	High	High	High	Yes	No	Don’t_know	Yes	No	No	No	No_impact	Agree	Agree	Unsure	Partially_agree	Partially_disagree	Mostly_negative	Agree	Partially_agree	Partially_agree	Agree	Disagree	Partially_disagree	Agree	Partially_disagree	Agree	Disagree	No	No	Yes	Yes	Yes
177	Fairly_confident	A_combination	Strongly_agree	Agree	Unsure	Partially_agree	Partially_agree	High	High	High	Very_high	Very_high	Very_high	High	Very_high	Moderate	High	Very_high	High	High	Yes	No	No	No	No	No	No	No_impact	Strongly_agree	Partially_agree	Agree	Agree	Unsure	Mostly_negative	Partially_agree	Agree	Unsure	Strongly_disagree	Disagree	Strongly_agree	Strongly_agree	Strongly_agree	Strongly_agree	Strongly_disagree	No	Yes	No	Yes	Yes
178	Fairly_confident	A_combination	Agree	Unsure	Partially_agree	Agree	Disagree	High	High	Moderate	High	High	Moderate	High	Moderate	High	Moderate	Moderate	High	Moderate	Don’t_know	Don’t_know	Don’t_know	Yes	No	No	No	No_impact	Strongly_agree	Disagree	Unsure	Disagree	Unsure	Mostly_negative	Unsure	Partially_agree	Partially_agree	Disagree	Partially_disagree	Strongly_agree	Agree	Unsure	Strongly_agree	Disagree	Yes	Yes	No	Yes	No
179	Very_confident	A_combination	Partially_agree	Disagree	Agree	Agree	Partially_agree	High	High	Very_high	High	Very_high	Very_high	Moderate	Very_high	Very_high	High	High	Very_high	Very_high	Yes	Don’t_know	Yes	Yes	No	Yes	Don’t_know	No_impact	Agree	Agree	Agree	Unsure	Agree	Mostly_negative	Agree	Agree	Agree	Unsure	Unsure	Agree	Partially_agree	Unsure	Partially_agree	Disagree	I_don't_know	Yes	No	I_don't_know	No
180	Very_confident	Human_activity	Agree	Partially_disagree	Strongly_agree	Strongly_agree	Agree	Very_high	Very_high	Very_high	High	High	Very_high	Very_high	Very_high	Very_high	Very_high	Very_high	High	High	Yes	No	No	Yes	No	No	Don’t_know	Mostly_positive	Strongly_agree	Agree	Agree	Agree	Agree	Mostly_negative	Strongly_agree	Strongly_agree	Partially_agree	Agree	Disagree	Strongly_agree	Agree	Unsure	Agree	Strongly_disagree	No	No	Yes	Yes	Yes
181	Not_confident_at_all	Natural_patterns	Partially_agree	Partially_disagree	Partially_disagree	Partially_disagree	Partially_agree	Very_low	Moderate	Moderate	Low	Low	Very_low	Low	Low	Low	Low	Low	Low	Low	Yes	No	No	No	No	No	No	No_impact	Strongly_disagree	Partially_disagree	Partially_disagree	Partially_agree	Partially_disagree	No_impact	Partially_disagree	Partially_disagree	Partially_disagree	Unsure	Partially_disagree	Partially_agree	Strongly_agree	Unsure	Unsure	Partially_agree	No	No	No	No	No
182	Very_confident	Human_activity	Partially_agree	Partially_agree	Agree	Partially_agree	Disagree	High	High	High	High	High	Moderate	High	High	High	High	High	Moderate	High	Yes	No	No	Yes	No	No	No	Mostly_negative	Agree	Partially_agree	Agree	Partially_agree	Partially_agree	Mostly_negative	Agree	Partially_agree	Partially_agree	Partially_agree	Partially_agree	Agree	Agree	Agree	Agree	Partially_disagree	No	No	Yes	Yes	I_don't_know
183	Very_confident	A_combination	Strongly_agree	Disagree	Agree	Strongly_agree	Strongly_disagree	Moderate	Very_high	Very_high	Very_high	High	Very_high	Very_high	Low	Very_high	Very_high	High	Very_high	High	Yes	No	No	Yes	No	No	No	Mostly_negative	Strongly_agree	Partially_disagree	Unsure	Partially_disagree	Unsure	Mostly_positive	Partially_agree	Agree	Agree	Partially_disagree	Unsure	Agree	Partially_agree	Partially_agree	Agree	Disagree	No	No	No	Yes	Yes
184	Very_confident	Human_activity	Partially_agree	Partially_agree	Agree	Partially_agree	Partially_disagree	High	High	High	High	High	High	Moderate	High	High	Moderate	Moderate	Moderate	Moderate	No	No	No	Yes	No	No	No	No_impact	Strongly_agree	Unsure	Unsure	Disagree	Unsure	Positive	Agree	Partially_agree	Agree	Partially_agree	Disagree	Strongly_agree	Agree	Partially_agree	Agree	Disagree	No	Yes	No	Yes	I_don't_know
185	Fairly_confident	Natural_patterns	Unsure	Disagree	Agree	Agree	Disagree	High	High	High	High	High	High	High	High	High	High	High	High	High	Don’t_know	Don’t_know	No	Don’t_know	No	No	No	Mostly_negative	Strongly_disagree	Agree	Agree	Unsure	Disagree	Mostly_negative	Agree	Agree	Agree	Disagree	Disagree	Agree	Disagree	Unsure	Agree	Partially_agree	I_don't_know	I_don't_know	I_don't_know	Yes	I_don't_know
186	Very_confident	A_combination	Strongly_agree	Partially_disagree	Agree	Unsure	Disagree	High	Very_high	Very_high	Very_high	Very_high	Very_high	Moderate	Very_high	Very_high	Very_high	High	High	High	Yes	No	No	Yes	No	No	No	No_impact	Strongly_agree	Agree	Agree	Partially_disagree	Unsure	Mostly_negative	Agree	Agree	Agree	Disagree	Disagree	Unsure	Agree	Agree	Agree	Disagree	No	Yes	No	No	No
187	Very_confident	Human_activity	Strongly_agree	Disagree	Strongly_agree	Strongly_agree	Strongly_disagree	Very_high	Very_high	Very_high	Very_high	Very_high	Very_high	Very_high	Very_high	Very_high	Very_high	Very_high	Very_high	Very_high	Yes	No	No	Yes	No	Yes	No	Mostly_negative	Agree	Partially_agree	Strongly_agree	Disagree	Partially_agree	Mostly_negative	Agree	Agree	Agree	Disagree	Unsure	Agree	Unsure	Unsure	Unsure	Disagree	Yes	I_don't_know	Yes	I_don't_know	I_don't_know
188	Not_confident_at_all	A_combination	Unsure	Strongly_agree	Disagree	Strongly_disagree	Strongly_agree	Moderate	Low	Moderate	Low	Low	Low	Very_low	Low	Very_low	Low	Moderate	Low	Very_low	No	No	No	No	No	No	No	Positive	Agree	Strongly_disagree	Disagree	Disagree	NoAnswer	Mostly_positive	Strongly_disagree	Disagree	Partially_disagree	Disagree	Unsure	Agree	Partially_agree	Unsure	Agree	Agree	Yes	Yes	No	Yes	Yes
189	Not_sure	Natural_patterns	Unsure	Agree	Unsure	Disagree	Unsure	Moderate	High	High	Low	Moderate	Moderate	Moderate	Moderate	High	Moderate	High	Moderate	Moderate	No	No	No	No	No	Yes	No	No_impact	Agree	Unsure	Agree	Agree	Disagree	Mostly_negative	Disagree	Agree	Unsure	Unsure	Partially_disagree	Agree	Partially_agree	Partially_agree	Partially_agree	Partially_agree	No	Yes	Yes	Yes	Yes
190	Very_confident	A_combination	Partially_agree	Unsure	Partially_agree	Partially_agree	Partially_disagree	High	High	High	Moderate	High	Moderate	Very_high	High	Very_high	Moderate	Very_high	High	Very_high	Yes	Don’t_know	Don’t_know	Yes	No	Don’t_know	Yes	No_impact	Strongly_disagree	Partially_disagree	Partially_disagree	Unsure	Unsure	Mostly_negative	Unsure	Unsure	Unsure	Partially_disagree	Disagree	Agree	Strongly_disagree	Unsure	Partially_disagree	Partially_agree	No	No	No	Yes	Yes
191	Not_too_confident	A_combination	Partially_agree	Agree	Partially_disagree	Disagree	Agree	Don’t_know	Moderate	Moderate	Don’t_know	Moderate	Moderate	Moderate	Low	Moderate	Moderate	Moderate	Moderate	Don’t_know	No	No	No	No	No	No	No	No_impact	Agree	Disagree	Partially_agree	Partially_agree	Disagree	Mostly_positive	Unsure	Partially_agree	Partially_disagree	Partially_agree	Partially_agree	Unsure	Partially_disagree	Partially_agree	Unsure	Agree	No	No	No	No	Yes
192	Fairly_confident	Human_activity	Agree	Partially_disagree	Agree	Partially_agree	Unsure	High	High	Moderate	Moderate	High	High	High	High	Very_high	Very_high	Very_high	Moderate	High	Yes	Yes	No	Yes	No	No	No	Mostly_negative	Partially_agree	Partially_agree	Partially_agree	Unsure	Unsure	Mostly_negative	Partially_agree	Partially_agree	Partially_agree	Disagree	Disagree	Partially_agree	Partially_disagree	Unsure	Partially_agree	Disagree	No	I_don't_know	No	I_don't_know	I_don't_know
193	Fairly_confident	Human_activity	Strongly_agree	Partially_disagree	Agree	Partially_agree	Disagree	Moderate	High	Very_high	Very_high	High	Very_high	High	Moderate	High	Very_high	High	High	Very_high	No	No	Yes	Yes	No	No	No	Mostly_negative	Strongly_agree	Unsure	Partially_agree	Disagree	Partially_agree	Mostly_negative	Partially_agree	Agree	Strongly_agree	Disagree	Disagree	Agree	Strongly_agree	Partially_agree	Strongly_agree	Unsure	No	No	Yes	Yes	Yes
194	Very_confident	A_combination	Strongly_agree	Agree	Agree	Agree	Disagree	Very_high	Very_high	Very_high	Very_high	Very_high	High	High	Very_high	Very_high	Very_high	Very_high	High	Very_high	Yes	No	Yes	Yes	No	Yes	No	No_impact	Strongly_agree	Agree	Agree	Partially_disagree	Agree	Mostly_negative	Agree	Agree	Partially_agree	Partially_disagree	Disagree	Agree	Strongly_agree	Unsure	Agree	Disagree	No	Yes	Yes	I_don’t_know	No
195	Very_confident	Human_activity	Strongly_agree	Agree	Strongly_agree	Agree	Strongly_disagree	Very_high	Very_high	Very_high	Very_high	Very_high	Very_high	Very_high	Very_high	Very_high	Very_high	Very_high	Very_high	Very_high	Yes	No	Yes	Yes	No	Yes	No	Mostly_negative	Agree	Agree	Strongly_agree	Strongly_disagree	Partially_agree	Negative	Unsure	Strongly_agree	Strongly_agree	Disagree	Disagree	Partially_agree	Strongly_agree	Unsure	Unsure	Agree	No	I_don’t_know	Yes	Yes	I_don’t_know
196	Very_confident	Human_activity	Agree	Partially_disagree	Strongly_agree	Strongly_agree	Strongly_disagree	High	High	Don’t_know	High	High	High	High	High	High	High	High	Don’t_know	High	No	No	No	Yes	No	No	No	Mostly_negative	Strongly_agree	Strongly_agree	Strongly_agree	Strongly_disagree	Disagree	Mostly_negative	Strongly_agree	Strongly_agree	Strongly_agree	Disagree	Unsure	Agree	Agree	Partially_agree	Strongly_agree	Disagree	I_don’t_know	Yes	I_don’t_know	Yes	I_don’t_know
197	Very_confident	Human_activity	Partially_agree	Unsure	Agree	Agree	Strongly_disagree	Very_high	High	High	High	High	Don’t_know	High	Very_high	Very_high	High	Very_high	Very_high	Very_high	Yes	Yes	No	No	No	No	No	Negative	Agree	Agree	Strongly_agree	Partially_disagree	Partially_disagree	Mostly_negative	Agree	Strongly_agree	Agree	Strongly_disagree	Strongly_disagree	Strongly_agree	Partially_agree	Partially_disagree	Strongly_agree	Strongly_disagree	No	Yes	Yes	Yes	Yes
198	Not_too_confident	Natural_patterns	Unsure	Partially_disagree	Unsure	Partially_disagree	Partially_agree	Moderate	Moderate	High	High	High	Moderate	Moderate	High	Moderate	Moderate	Moderate	Moderate	Moderate	NoAnswer	NoAnswer	NoAnswer	NoAnswer	NoAnswer	NoAnswer	NoAnswer	NoAnswer	NoAnswer	NoAnswer	NoAnswer	NoAnswer	NoAnswer	NoAnswer	NoAnswer	NoAnswer	NoAnswer	Partially_agree	Disagree	Partially_agree	Partially_agree	Unsure	Agree	Agree	No	I_don't_know	I_don't_know	Yes	I_don't_know
199	Fairly_confident	A_combination	Unsure	Unsure	Unsure	Unsure	Partially_disagree	Moderate	Moderate	Moderate	Low	Moderate	Moderate	Moderate	Moderate	High	Moderate	High	Moderate	High	No	No	No	No	No	No	No	No_impact	Agree	Partially_disagree	Partially_disagree	Unsure	Disagree	Mostly_negative	Partially_agree	Partially_agree	Partially_agree	Unsure	Unsure	Partially_agree	Partially_disagree	Unsure	Partially_agree	Partially_disagree	No	Yes	I_don't_know	Yes	Yes
200	Fairly_confident	A_combination	Agree	Partially_disagree	Agree	Partially_agree	Disagree	High	High	High	High	High	High	High	Very_high	Very_high	High	High	High	Very_high	Yes	No	Yes	No	NoAnswer	Yes	No	Mostly_positive	Strongly_agree	Strongly_agree	Agree	Disagree	Partially_agree	Mostly_positive	Strongly_agree	Strongly_agree	Strongly_agree	Disagree	Partially_disagree	Partially_disagree	Partially_agree	Partially_agree	Agree	Disagree	No	Yes	Yes	Yes	No
201	Very_confident	Human_activity	Partially_agree	Agree	Unsure	Unsure	Disagree	Very_high	Moderate	Moderate	High	Very_high	High	Very_high	Very_high	High	High	High	Moderate	Moderate	Yes	No	No	Yes	No	No	No	Mostly_positive	Strongly_agree	Agree	Strongly_agree	Disagree	Disagree	Mostly_negative	Strongly_agree	Agree	Partially_agree	Agree	Partially_agree	Strongly_agree	Partially_agree	Agree	Agree	Partially_disagree	No	Yes	No	Yes	Yes
202	Very_confident	A_combination	Partially_agree	Partially_disagree	Strongly_agree	Strongly_agree	Disagree	Very_high	Very_high	Moderate	Very_high	Very_high	High	Very_high	Very_high	Very_high	Very_high	Very_high	High	Very_high	Yes	No	No	Yes	No	No	No	Mostly_positive	Strongly_agree	Partially_agree	Agree	Partially_agree	Partially_disagree	Mostly_negative	Agree	Agree	Unsure	Partially_agree	Agree	NoAnswer	Disagree	Unsure	Agree	Unsure	No	No	No	Yes	No
203	Fairly_confident	Human_activity	Agree	Disagree	Agree	Agree	Disagree	Very_high	Very_high	Very_high	Very_high	Very_high	Very_high	Very_high	Very_high	Very_high	Very_high	Very_high	Very_high	Very_high	Yes	No	Yes	Yes	No	Yes	No	Mostly_negative	Strongly_agree	Agree	Agree	Strongly_disagree	Agree	Mostly_negative	Agree	Agree	Agree	Partially_disagree	Disagree	Agree	Agree	Disagree	Agree	Disagree	Yes	Yes	I_don't_know	I_don't_know	Yes
204	Not_sure	A_combination	Disagree	Partially_disagree	Unsure	Agree	Partially_agree	Moderate	Don’t_know	High	Low	Low	Moderate	High	Moderate	Moderate	High	Moderate	Don’t_know	Low	No	No	No	No	No	No	No	No_impact	Strongly_agree	Partially_disagree	Agree	Disagree	Disagree	Mostly_negative	Partially_agree	Agree	Agree	Partially_disagree	Disagree	Agree	Disagree	Partially_disagree	Unsure	Agree	No	I_don't_know	No	Yes	I_don't_know
205	Fairly_confident	A_combination	Partially_agree	Partially_disagree	Partially_agree	Disagree	Partially_agree	High	Moderate	High	Moderate	Low	Moderate	Moderate	Moderate	High	High	High	Moderate	Moderate	Yes	No	No	Yes	No	No	No	Positive	Agree	Unsure	Partially_disagree	Partially_agree	Disagree	Mostly_negative	Unsure	Unsure	Disagree	Disagree	Partially_disagree	Agree	Partially_agree	Unsure	Partially_agree	Disagree	Yes	Yes	Yes	Yes	Yes
206	Fairly_confident	NoAnswer	NoAnswer	NoAnswer	NoAnswer	NoAnswer	NoAnswer	NoAnswer	NoAnswer	NoAnswer	NoAnswer	NoAnswer	NoAnswer	NoAnswer	NoAnswer	NoAnswer	NoAnswer	NoAnswer	NoAnswer	NoAnswer	Yes	No	No	No	No	Yes	No	No_impact	Agree	Partially_agree	Agree	Disagree	Unsure	Mostly_negative	Agree	Agree	Agree	Disagree	Disagree	Agree	Agree	Partially_agree	Partially_agree	Agree	No	Yes	Yes	No	Yes
207	Very_confident	Human_activity	Strongly_agree	Strongly_disagree	Agree	Partially_agree	Strongly_disagree	Very_high	Very_high	Very_high	Very_high	Very_high	Very_high	Very_high	Very_high	Very_high	Very_high	Very_high	Very_high	Very_high	Don’t_know	Don’t_know	No	No	No	No	No	Mostly_positive	Strongly_agree	Agree	Partially_agree	Disagree	Disagree	No_impact	NoAnswer	Partially_disagree	Disagree	Disagree	Disagree	Disagree	Disagree	Disagree	Disagree	Partially_disagree	No	No	Yes	Yes	Yes
208	Fairly_confident	A_combination	Partially_agree	Unsure	Unsure	Partially_agree	Partially_disagree	Moderate	High	Moderate	Moderate	Low	Moderate	Moderate	Low	Moderate	High	Low	Low	Moderate	Yes	No	No	No	Yes	Yes	No	No_impact	Partially_agree	Unsure	Disagree	Partially_agree	Unsure	No_impact	Partially_disagree	Unsure	Partially_disagree	Partially_disagree	Partially_disagree	Agree	Disagree	Unsure	Partially_agree	Partially_disagree	No	No	No	Yes	No
209	Fairly_confident	A_combination	Agree	Unsure	Unsure	Partially_disagree	Partially_agree	Low	Low	Moderate	Low	Low	Low	Low	Low	NoAnswer	Moderate	Moderate	Moderate	Moderate	Yes	No	No	Yes	No	No	No	Mostly_positive	Partially_agree	Partially_agree	Partially_agree	Partially_agree	Partially_agree	Mostly_negative	Partially_agree	Partially_agree	Partially_agree	Partially_agree	Partially_agree	Partially_agree	Partially_agree	Partially_agree	Partially_agree	Partially_agree	Yes	Yes	Yes	Yes	Yes
210	Very_confident	A_combination	Strongly_agree	Unsure	Agree	Agree	Unsure	Very_high	Very_high	High	Low	Moderate	Very_high	Very_high	Moderate	Very_high	Very_high	Very_high	Moderate	High	Yes	Yes	No	Yes	No	No	No	No_impact	Strongly_agree	Partially_disagree	Partially_disagree	Agree	Unsure	Mostly_negative	Unsure	Agree	Unsure	Disagree	Unsure	Agree	Agree	Partially_disagree	Strongly_agree	Strongly_disagree	No	Yes	No	No	Yes
211	Fairly_confident	Natural_patterns	Agree	Strongly_agree	Agree	Agree	Agree	Moderate	Moderate	Moderate	Moderate	Moderate	Moderate	High	Low	Moderate	High	Moderate	Moderate	Moderate	Yes	No	No	Yes	No	Yes	No	Mostly_positive	Strongly_agree	Disagree	Disagree	Disagree	Strongly_disagree	Positive	Disagree	Disagree	Strongly_disagree	Disagree	Disagree	Partially_agree	Partially_agree	Partially_agree	Partially_agree	Disagree	No	No	No	Yes	No
212	Fairly_confident	A_combination	Partially_agree	Agree	Agree	Partially_agree	Partially_agree	High	Moderate	Moderate	Low	High	Moderate	High	Moderate	Moderate	Moderate	Moderate	Moderate	High	No	No	No	No	No	No	No	Mostly_positive	Strongly_disagree	Agree	Agree	Unsure	Unsure	Mostly_negative	Partially_agree	Partially_agree	Partially_agree	Partially_agree	Partially_agree	Agree	Agree	Agree	Partially_agree	Agree	No	Yes	No	Yes	Yes
213	Not_too_confident	A_combination	Unsure	Partially_agree	Partially_agree	Partially_agree	Partially_agree	Low	Low	Moderate	Moderate	Low	High	Low	Low	Moderate	Very_low	Moderate	Low	Low	No	No	No	No	No	No	No	Mostly_positive	Strongly_agree	Unsure	Unsure	Agree	Unsure	Mostly_positive	Unsure	Unsure	Partially_disagree	Disagree	Disagree	Partially_agree	Partially_agree	Partially_disagree	Partially_agree	Partially_agree	No	I_don't_know	I_don't_know	I_don't_know	I_don't_know
214	Fairly_confident	Natural_patterns	Unsure	Partially_agree	Partially_agree	Disagree	Partially_agree	Very_high	Very_high	Very_high	High	High	High	High	High	High	High	Moderate	High	Low	No	No	No	Yes	No	No	No	No_impact	Strongly_agree	Partially_disagree	Partially_disagree	Agree	Partially_disagree	No_impact	Unsure	Unsure	Unsure	Strongly_disagree	Unsure	Partially_agree	Partially_disagree	Unsure	Partially_agree	Partially_disagree	No	No	No	Yes	I_don't_know
215	Very_confident	Human_activity	Agree	Disagree	Agree	Agree	Disagree	High	High	Moderate	Moderate	Moderate	Moderate	High	High	High	High	High	Moderate	Moderate	No	No	No	Yes	No	No	Don’t_know	Mostly_positive	Partially_agree	Agree	Agree	Disagree	Disagree	Mostly_negative	Partially_agree	Partially_agree	Partially_agree	Unsure	Unsure	Agree	Agree	Unsure	Agree	Strongly_disagree	No	Yes	Yes	Yes	Yes
216	Fairly_confident	A_combination	Unsure	Partially_disagree	Unsure	Partially_disagree	Partially_disagree	High	High	Moderate	High	High	High	High	High	High	Moderate	Moderate	Moderate	High	Yes	No	No	No	No	No	No	No_impact	Agree	Partially_agree	Agree	Partially_disagree	Partially_agree	Mostly_negative	Agree	Partially_agree	Partially_agree	Partially_disagree	Partially_disagree	Agree	Agree	Unsure	Partially_agree	Partially_disagree	Yes	Yes	Yes	No	No
217	Very_confident	A_combination	Partially_agree	Unsure	Partially_agree	Agree	Partially_disagree	High	Very_high	Very_high	Very_high	Very_high	High	Very_high	Very_high	Very_high	Very_high	Very_high	Very_high	Very_high	Yes	No	Don’t_know	Yes	No	Don’t_know	No	Mostly_negative	Strongly_agree	Agree	Agree	Strongly_disagree	Partially_agree	Mostly_negative	Agree	Agree	Agree	Partially_disagree	Partially_disagree	Agree	Disagree	Unsure	Partially_agree	Unsure	No	Yes	Yes	Yes	Yes
218	Very_confident	Human_activity	Strongly_agree	Partially_disagree	Strongly_agree	Partially_agree	Disagree	Very_high	Don’t_know	Don’t_know	Very_high	Very_high	Very_high	Very_high	Very_high	Very_high	Very_high	Very_high	Don’t_know	Very_high	No	No	No	Yes	No	Don’t_know	Don’t_know	Mostly_negative	Strongly_agree	Agree	Strongly_agree	Disagree	Unsure	Negative	Strongly_agree	Strongly_agree	Strongly_agree	Disagree	Strongly_disagree	Strongly_agree	Agree	Disagree	Unsure	Partially_disagree	No	Yes	Yes	No	I_don't_know
219	Fairly_confident	A_combination	Strongly_agree	Unsure	Partially_agree	Partially_agree	Strongly_agree	High	High	High	Moderate	Moderate	High	High	High	High	High	High	High	Moderate	No	No	No	No	No	No	No	Mostly_positive	Agree	Agree	Agree	Disagree	Unsure	Mostly_positive	Agree	Agree	Disagree	Agree	Disagree	Unsure	Agree	Agree	Unsure	Disagree	No	No	Yes	No	No
220	Fairly_confident	A_combination	Partially_agree	Agree	Strongly_disagree	Strongly_disagree	Strongly_agree	Low	Moderate	Moderate	Low	Low	Low	Low	Low	Very_low	Low	Low	Very_low	Low	Yes	No	No	Yes	No	No	No	Positive	Strongly_agree	Strongly_disagree	Disagree	Agree	Disagree	Mostly_positive	Partially_disagree	Partially_disagree	Disagree	Strongly_disagree	Strongly_disagree	Disagree	Strongly_agree	Partially_disagree	Strongly_agree	Agree	No	No	No	No	No
221	Fairly_confident	A_combination	Strongly_agree	Partially_agree	Agree	Agree	Partially_disagree	High	High	High	High	High	High	Moderate	High	Moderate	Moderate	Moderate	High	Moderate	No	No	No	Yes	No	Yes	No	Mostly_positive	Agree	Agree	Agree	Agree	Unsure	Mostly_positive	Partially_agree	Partially_agree	Unsure	Agree	Agree	Agree	Agree	Partially_agree	Partially_agree	Agree	No	Yes	Yes	Yes	I_don't_know
222	Fairly_confident	A_combination	Partially_agree	Partially_disagree	Partially_agree	Partially_agree	Disagree	Moderate	Moderate	High	High	High	Moderate	High	High	High	High	High	High	Moderate	Yes	No	No	Yes	No	Yes	No	No_impact	Strongly_agree	Partially_agree	Agree	Strongly_agree	Partially_agree	Mostly_negative	Agree	Agree	Agree	Unsure	Unsure	Strongly_agree	Strongly_agree	Agree	Agree	Unsure	I_don't_know	Yes	Yes	Yes	I_don't_know
223	Not_too_confident	Natural_patterns	Unsure	Partially_agree	Partially_agree	Unsure	Partially_agree	Low	High	Moderate	Moderate	Moderate	High	Moderate	Moderate	Moderate	High	High	Moderate	High	Yes	No	No	No	No	No	No	Mostly_negative	Strongly_agree	Agree	Agree	Partially_agree	Unsure	Mostly_negative	Partially_agree	Partially_agree	Partially_agree	Partially_disagree	Unsure	Partially_agree	Partially_agree	Unsure	Partially_agree	Disagree	Yes	I_don't_know	Yes	I_don't_know	I_don't_know
224	Fairly_confident	A_combination	Partially_agree	Unsure	Partially_agree	Partially_agree	Unsure	High	High	High	High	High	Very_high	Very_high	High	High	Moderate	High	Moderate	High	Yes	No	No	No	No	No	Yes	No_impact	Strongly_agree	Unsure	Unsure	Disagree	Agree	Mostly_negative	Agree	Agree	Agree	Disagree	Disagree	Agree	Unsure	Unsure	Agree	Partially_disagree	Yes	Yes	I_don't_know	Yes	I_don't_know
225	Fairly_confident	A_combination	Agree	Partially_agree	Agree	Partially_agree	Agree	Moderate	Moderate	Moderate	High	High	Moderate	Moderate	High	High	High	Moderate	High	Moderate	Yes	No	No	Yes	No	No	Don’t_know	No_impact	Agree	Partially_agree	Partially_agree	Partially_agree	Unsure	Mostly_negative	Partially_agree	Agree	Partially_agree	Disagree	Disagree	Agree	Partially_agree	Unsure	Unsure	Partially_disagree	No	I_don't_know	No	Yes	Yes
226	Fairly_confident	Human_activity	Agree	Agree	Partially_agree	Partially_agree	Unsure	Moderate	Moderate	Moderate	Moderate	High	High	High	Moderate	Moderate	Moderate	High	Moderate	Moderate	No	No	No	No	No	No	No	Mostly_positive	Agree	Partially_agree	Unsure	Partially_agree	Unsure	Mostly_negative	Agree	Partially_agree	Partially_agree	Unsure	Unsure	Agree	Disagree	Unsure	Agree	Partially_agree	I_don't_know	I_don't_know	I_don't_know	I_don't_know	Yes
227	Fairly_confident	A_combination	NoAnswer	Unsure	Partially_agree	Agree	Partially_disagree	Moderate	Moderate	Moderate	Moderate	Moderate	High	Moderate	High	High	High	High	Moderate	Moderate	No	No	No	Yes	No	No	No	Mostly_positive	Strongly_agree	Agree	Agree	Partially_agree	Disagree	No_impact	Partially_agree	Unsure	Unsure	Unsure	Partially_agree	Partially_agree	Agree	Partially_agree	Strongly_agree	Disagree	Yes	Yes	Yes	Yes	No
228	Fairly_confident	NoAnswer	NoAnswer	NoAnswer	NoAnswer	NoAnswer	NoAnswer	NoAnswer	NoAnswer	NoAnswer	NoAnswer	NoAnswer	NoAnswer	NoAnswer	NoAnswer	NoAnswer	NoAnswer	NoAnswer	NoAnswer	NoAnswer	Don’t_know	Don’t_know	Don’t_know	Don’t_know	No	No	No	No_impact	Agree	Strongly_agree	Agree	Disagree	Unsure	No_impact	Unsure	Agree	Agree	Unsure	Unsure	Partially_agree	Partially_agree	Partially_agree	Unsure	Partially_disagree	Yes	Yes	No	I_don't_know	I_don't_know
229	Fairly_confident	Natural_patterns	Agree	Partially_agree	Partially_agree	Disagree	Strongly_agree	High	High	Moderate	Low	Low	High	High	Very_high	High	Moderate	High	Moderate	Low	No	No	No	Yes	No	No	No	Mostly_positive	Agree	Partially_agree	Partially_agree	Disagree	Strongly_disagree	Positive	Strongly_agree	Strongly_agree	Agree	Disagree	Partially_agree	Unsure	Strongly_agree	Partially_agree	Strongly_agree	Partially_agree	No	No	Yes	Yes	No
230	Fairly_confident	A_combination	Agree	Unsure	Partially_agree	Partially_agree	Partially_agree	High	Moderate	Very_high	High	High	Moderate	High	Very_high	Moderate	Moderate	High	High	Moderate	No	No	No	No	No	No	No	Mostly_positive	Strongly_agree	Agree	Unsure	Partially_agree	Disagree	Mostly_positive	Strongly_agree	Partially_agree	Unsure	Strongly_disagree	Unsure	Partially_agree	Strongly_agree	Agree	Partially_agree	Partially_disagree	I_don't_know	Yes	Yes	Yes	Yes
231	Very_confident	Human_activity	Strongly_agree	Disagree	Partially_agree	Agree	Disagree	High	High	High	Moderate	Moderate	Very_high	High	High	High	Moderate	High	High	High	No	No	No	Yes	No	No	No	No_impact	Strongly_agree	Unsure	Agree	Partially_agree	Unsure	No_impact	Unsure	Strongly_agree	Partially_agree	Partially_disagree	Partially_agree	Strongly_agree	Strongly_agree	Partially_disagree	Partially_agree	Strongly_disagree	No	No	Yes	Yes	Yes
232	Not_sure	Human_activity	Unsure	Strongly_disagree	Partially_disagree	Agree	Agree	High	Don’t_know	High	Moderate	High	Moderate	Moderate	Moderate	High	Low	High	Moderate	Moderate	No	No	No	Yes	No	Yes	Yes	Mostly_positive	Strongly_disagree	Partially_disagree	Agree	Unsure	Partially_agree	No_impact	Partially_agree	Partially_disagree	Unsure	Partially_agree	Agree	Agree	Partially_agree	Partially_agree	Agree	Agree	No	Yes	Yes	Yes	Yes
233	Fairly_confident	A_combination	Partially_agree	Unsure	Unsure	Unsure	Partially_disagree	Moderate	Moderate	Moderate	Moderate	Moderate	Moderate	Moderate	High	Moderate	Moderate	Moderate	Don’t_know	Moderate	No	No	No	Yes	No	No	No	Mostly_negative	Strongly_agree	Partially_agree	Partially_agree	Disagree	Disagree	Mostly_negative	Agree	Partially_agree	Unsure	Disagree	Unsure	Unsure	Partially_agree	Partially_agree	Agree	Agree	No	Yes	Yes	I_don’t_know	I_don’t_know
234	Fairly_confident	NoAnswer	NoAnswer	NoAnswer	NoAnswer	NoAnswer	NoAnswer	NoAnswer	NoAnswer	NoAnswer	NoAnswer	NoAnswer	NoAnswer	NoAnswer	NoAnswer	NoAnswer	NoAnswer	NoAnswer	NoAnswer	NoAnswer	Yes	No	No	Yes	No	No	No	No_impact	Strongly_agree	Unsure	Agree	Strongly_disagree	Unsure	Mostly_negative	Unsure	Unsure	Unsure	Disagree	Strongly_disagree	Agree	Agree	Disagree	Agree	Unsure	No	Yes	No	Yes	I_don't_know
235	Fairly_confident	Natural_patterns	Partially_disagree	Partially_disagree	Partially_disagree	Disagree	Disagree	Moderate	Moderate	Moderate	Moderate	Moderate	Moderate	Moderate	High	High	Moderate	High	Moderate	High	Yes	No	No	Yes	No	Don’t_know	No	No_impact	Partially_disagree	Partially_disagree	Partially_disagree	Strongly_disagree	Partially_disagree	Mostly_negative	Partially_disagree	Partially_disagree	Partially_disagree	Disagree	Disagree	Partially_disagree	Disagree	Disagree	Partially_disagree	Partially_disagree	I_don't_know	I_don't_know	Yes	Yes	I_don't_know
236	Very_confident	A_combination	Agree	Unsure	Agree	Partially_agree	Disagree	High	Moderate	High	Moderate	Moderate	Moderate	High	High	Moderate	High	Moderate	Moderate	Moderate	No	No	Yes	Yes	No	No	No	Mostly_positive	Strongly_agree	Agree	Agree	Unsure	Unsure	Mostly_negative	Agree	Agree	Partially_agree	Unsure	Partially_disagree	Agree	Agree	Agree	Partially_agree	Agree	No	No	Yes	No	I_don't_know
237	Very_confident	A_combination	Partially_agree	Disagree	Strongly_agree	Agree	Partially_agree	High	Moderate	Moderate	Low	Low	Moderate	High	High	High	Moderate	Moderate	Moderate	High	Yes	No	No	Yes	No	No	No	No_impact	Agree	Agree	Partially_agree	Agree	Disagree	Mostly_negative	Agree	Agree	Disagree	Disagree	Disagree	Agree	Agree	Unsure	Agree	Unsure	Yes	Yes	Yes	Yes	I_don't_know
238	Fairly_confident	A_combination	Strongly_agree	Partially_agree	Strongly_agree	Agree	Disagree	High	High	High	Moderate	High	High	High	High	High	Moderate	High	Moderate	High	No	No	No	No	No	No	Don’t_know	No_impact	Strongly_disagree	Agree	Agree	Partially_agree	Unsure	Mostly_negative	Strongly_agree	Agree	Partially_agree	Disagree	Strongly_disagree	Strongly_agree	Disagree	Unsure	Partially_agree	Partially_agree	No	I_don't_know	Yes	Yes	No
239	Not_too_confident	A_combination	Agree	Agree	Unsure	Agree	Agree	Moderate	High	Very_high	Moderate	Moderate	Moderate	Moderate	Moderate	High	Very_high	High	Very_high	High	Yes	No	No	Yes	No	No	No	Positive	Strongly_agree	Unsure	Strongly_agree	Partially_agree	Agree	Negative	Partially_agree	Agree	Partially_agree	Partially_agree	Agree	Agree	Agree	Partially_agree	Agree	Unsure	Yes	Yes	No	No	Yes
240	Fairly_confident	Natural_patterns	Unsure	Partially_agree	Partially_agree	Unsure	Agree	Moderate	Moderate	Moderate	Low	Moderate	Moderate	Moderate	Moderate	Moderate	Moderate	Moderate	Moderate	Moderate	Yes	No	No	Yes	No	No	No	No_impact	Strongly_agree	Partially_disagree	Partially_disagree	Partially_agree	Unsure	No_impact	Partially_disagree	Partially_disagree	Partially_disagree	Disagree	Unsure	Partially_agree	Agree	Partially_agree	Agree	Disagree	No	No	No	No	Yes
241	Not_sure	Human_activity	Partially_agree	Partially_agree	Partially_disagree	Partially_disagree	Unsure	Moderate	High	High	Moderate	Low	Low	High	Moderate	High	Low	Moderate	High	Low	No	No	No	No	No	No	No	Positive	Agree	Partially_disagree	Unsure	Disagree	Unsure	Mostly_positive	Partially_agree	Partially_agree	Partially_agree	Disagree	Disagree	Agree	Agree	Partially_agree	Agree	Partially_disagree	Yes	No	Yes	Yes	Yes
242	Very_confident	Human_activity	Agree	Strongly_disagree	Strongly_agree	Strongly_agree	Strongly_disagree	Very_high	Very_high	Very_high	Very_high	Very_high	Very_high	Very_high	Very_high	Very_high	Very_high	Very_high	Very_high	Very_high	No	Don’t_know	Yes	Yes	No	No	No	Mostly_negative	Strongly_agree	Strongly_agree	Agree	Disagree	Agree	Mostly_negative	Agree	Strongly_agree	Strongly_agree	Disagree	Disagree	Agree	Partially_disagree	Unsure	Agree	Disagree	I_don't_know	Yes	I_don't_know	Yes	I_don't_know
243	Fairly_confident	A_combination	Unsure	Partially_agree	Agree	Partially_agree	Unsure	Moderate	Moderate	Moderate	Moderate	Moderate	Moderate	Moderate	Moderate	Moderate	Moderate	Moderate	Moderate	Moderate	No	No	No	Yes	No	No	No	Mostly_negative	Strongly_agree	Partially_agree	Agree	Strongly_agree	Unsure	Mostly_negative	Partially_agree	Agree	Agree	Disagree	Disagree	Agree	Strongly_agree	Disagree	Agree	Disagree	No	Yes	I_don't_know	I_don't_know	Yes
244	Not_sure	A_combination	Unsure	Strongly_disagree	Strongly_disagree	Disagree	Disagree	Low	Moderate	Moderate	Low	Low	High	Low	Moderate	Very_low	Moderate	High	Low	Moderate	Don’t_know	Don’t_know	Yes	Yes	No	No	Yes	No_impact	Agree	Unsure	Unsure	Strongly_agree	Unsure	No_impact	Unsure	Unsure	Unsure	Unsure	Unsure	Agree	Unsure	Unsure	Unsure	Disagree	Yes	Yes	No	Yes	No
245	Very_confident	A_combination	Agree	Partially_disagree	Agree	Partially_agree	Partially_agree	High	High	Moderate	High	High	High	Moderate	High	High	High	High	Moderate	Moderate	Yes	No	No	Yes	No	Yes	No	No_impact	Agree	Partially_agree	Partially_agree	Disagree	Unsure	Mostly_positive	Partially_agree	Unsure	Unsure	Partially_disagree	Partially_agree	Partially_agree	Agree	Agree	Partially_agree	Partially_agree	Yes	Yes	Yes	Yes	Yes
246	Fairly_confident	A_combination	Agree	Partially_agree	Strongly_agree	Agree	Unsure	Moderate	Moderate	Moderate	Low	Low	Low	High	High	High	Low	Moderate	Low	Moderate	Yes	No	No	Yes	No	No	No	No_impact	Agree	Agree	Agree	Agree	Agree	No_impact	Strongly_agree	Strongly_agree	Agree	Unsure	Partially_agree	Partially_agree	Unsure	Disagree	Unsure	Unsure	No	No	Yes	No	I_don't_know
247	Very_confident	NoAnswer	NoAnswer	NoAnswer	NoAnswer	NoAnswer	NoAnswer	NoAnswer	NoAnswer	NoAnswer	NoAnswer	NoAnswer	NoAnswer	NoAnswer	NoAnswer	NoAnswer	NoAnswer	NoAnswer	NoAnswer	NoAnswer	NoAnswer	NoAnswer	Yes	NoAnswer	NoAnswer	NoAnswer	NoAnswer	Positive	Strongly_disagree	Agree	Agree	Unsure	Partially_disagree	Mostly_positive	Agree	Agree	Agree	Unsure	Partially_disagree	Agree	Agree	Agree	Agree	Partially_disagree	No	I_don't_know	Yes	Yes	Yes
248	Very_confident	Human_activity	Agree	Partially_disagree	Partially_agree	Partially_agree	Agree	Moderate	High	High	High	Moderate	High	High	Moderate	High	Moderate	High	Moderate	Moderate	No	No	No	Yes	No	No	No	No_impact	Strongly_agree	Agree	Agree	Partially_disagree	Partially_disagree	No_impact	Partially_agree	Partially_agree	Unsure	Disagree	Disagree	Unsure	Agree	Agree	Partially_agree	Partially_disagree	No	No	Yes	I_don't_know	Yes
249	Fairly_confident	A_combination	Partially_agree	Strongly_agree	Partially_agree	Unsure	Partially_agree	Moderate	Low	High	High	Moderate	Moderate	Moderate	Low	Moderate	High	High	Moderate	Moderate	No	No	No	Yes	No	Yes	Yes	Mostly_positive	Strongly_agree	Partially_agree	Partially_disagree	Partially_agree	Disagree	Mostly_negative	Partially_agree	Unsure	Partially_disagree	Partially_disagree	Partially_agree	Strongly_agree	Strongly_agree	Agree	Agree	Partially_disagree	Yes	Yes	Yes	Yes	No
250	Very_confident	A_combination	Partially_agree	Unsure	Partially_agree	Partially_disagree	Unsure	Very_high	High	High	Moderate	Low	Moderate	Moderate	High	Very_high	Low	Moderate	Low	Moderate	Yes	No	Yes	No	No	No	No	Mostly_positive	Strongly_agree	Agree	Agree	Disagree	Disagree	Mostly_positive	Agree	Agree	Agree	Disagree	Disagree	Partially_agree	Strongly_agree	Partially_agree	Agree	Partially_agree	No	No	Yes	Yes	No
251	Fairly_confident	A_combination	Partially_agree	Agree	Agree	Partially_agree	Unsure	High	High	Very_high	Moderate	High	High	Very_high	High	High	Moderate	Very_high	Moderate	High	No	No	No	Yes	No	No	No	No_impact	Strongly_agree	Unsure	Unsure	Strongly_agree	Unsure	No_impact	Partially_agree	Agree	Unsure	Unsure	Unsure	Strongly_agree	Strongly_agree	Unsure	Strongly_agree	Agree	Yes	I_don't_know	Yes	I_don't_know	Yes
252	Very_confident	A_combination	Agree	Partially_disagree	Partially_agree	Agree	Strongly_disagree	Very_high	High	Very_high	Moderate	Moderate	Very_high	High	High	Very_high	Moderate	High	High	High	Yes	No	Yes	Yes	No	No	No	Mostly_negative	Strongly_agree	Partially_agree	Agree	Disagree	Unsure	Mostly_negative	Partially_agree	Agree	Agree	Unsure	Partially_disagree	Partially_disagree	Partially_agree	Partially_agree	Unsure	Partially_agree	Yes	No	Yes	Yes	Yes
253	Fairly_confident	A_combination	Partially_agree	Partially_agree	Partially_agree	Agree	Agree	Low	Moderate	Low	Low	Low	Moderate	Low	Moderate	Low	Moderate	Low	Low	Moderate	Yes	No	No	Don’t_know	No	No	Don’t_know	No_impact	Agree	Agree	Agree	Partially_agree	Unsure	No_impact	Agree	Agree	Agree	Unsure	Partially_agree	Agree	Unsure	Partially_agree	Partially_agree	Partially_agree	I_don’t_know	I_don’t_know	Yes	Yes	I_don’t_know
254	Not_too_confident	NoAnswer	NoAnswer	NoAnswer	NoAnswer	NoAnswer	NoAnswer	NoAnswer	NoAnswer	NoAnswer	NoAnswer	NoAnswer	NoAnswer	NoAnswer	NoAnswer	NoAnswer	NoAnswer	NoAnswer	NoAnswer	NoAnswer	Yes	NoAnswer	NoAnswer	NoAnswer	NoAnswer	NoAnswer	NoAnswer	Mostly_positive	Agree	Agree	Agree	Partially_agree	Partially_disagree	Mostly_positive	Partially_agree	Agree	Unsure	Agree	Agree	Agree	Partially_agree	Agree	Partially_agree	Unsure	Yes	Yes	Yes	No	Yes
255	Very_confident	Human_activity	Unsure	Partially_agree	Partially_agree	Partially_agree	Partially_disagree	High	Moderate	Moderate	Moderate	Moderate	Moderate	High	High	Very_high	High	High	High	High	Yes	Yes	Don’t_know	Yes	No	Yes	Don’t_know	No_impact	Strongly_agree	Agree	Agree	Disagree	Agree	Mostly_negative	Agree	Agree	Agree	Unsure	Unsure	Agree	Agree	Partially_agree	Partially_agree	Unsure	Yes	Yes	No	Yes	I_don't_know
256	Fairly_confident	Human_activity	Partially_agree	Strongly_disagree	Agree	Unsure	Partially_agree	High	Very_high	Moderate	Moderate	Very_high	Moderate	Very_high	Moderate	High	High	Moderate	Moderate	Moderate	No	No	No	Yes	No	No	No	No_impact	Strongly_agree	Unsure	Partially_disagree	Partially_agree	Disagree	No_impact	Partially_disagree	Partially_disagree	Partially_disagree	Unsure	Partially_disagree	Disagree	Unsure	Partially_disagree	Partially_disagree	Partially_agree	No	Yes	No	No	No
257	Not_confident_at_all	Natural_patterns	Partially_agree	Strongly_agree	Partially_agree	Strongly_disagree	Strongly_agree	Moderate	Moderate	Moderate	Very_low	Low	Moderate	Very_high	Very_high	Moderate	Very_high	Moderate	Low	Very_high	Yes	Yes	No	Yes	No	No	No	Positive	Strongly_agree	Partially_disagree	Strongly_agree	Partially_agree	Agree	Mostly_positive	Partially_agree	Partially_disagree	Partially_disagree	Strongly_disagree	Strongly_agree	Agree	Strongly_agree	Strongly_agree	Strongly_agree	Strongly_disagree	Yes	Yes	Yes	Yes	No
258	Very_confident	A_combination	Agree	Disagree	Disagree	Partially_disagree	Strongly_disagree	Low	High	High	Moderate	High	Moderate	Very_high	High	Very_high	High	High	Moderate	High	No	No	No	Yes	No	No	No	Mostly_positive	Strongly_agree	Agree	Strongly_agree	Partially_disagree	Disagree	Mostly_negative	Partially_agree	Agree	Strongly_agree	Partially_disagree	Partially_disagree	Strongly_agree	Unsure	Partially_agree	Partially_disagree	Disagree	No	No	Yes	Yes	Yes
259	Very_confident	A_combination	Agree	Partially_disagree	Agree	Partially_disagree	Disagree	High	Very_high	Very_high	Very_high	High	High	Moderate	Moderate	High	High	High	High	High	Yes	No	No	Yes	No	Yes	No	Mostly_positive	Strongly_agree	Unsure	Partially_agree	Partially_disagree	Unsure	Mostly_negative	Agree	Agree	Agree	Disagree	Disagree	Strongly_agree	Agree	Agree	Agree	Agree	Yes	Yes	Yes	No	I_don't_know
260	Fairly_confident	A_combination	Partially_agree	Partially_agree	Partially_agree	Partially_agree	Partially_disagree	Low	Moderate	Moderate	Moderate	Low	Moderate	High	High	High	Moderate	Moderate	Low	High	Yes	No	No	Yes	No	No	No	No_impact	Strongly_agree	Strongly_agree	Strongly_agree	Agree	Disagree	No_impact	Agree	Strongly_agree	Agree	Partially_agree	Partially_agree	Partially_agree	Partially_agree	Partially_agree	Agree	Agree	I_don't_know	Yes	Yes	Yes	I_don't_know
261	Not_confident_at_all	Natural_patterns	Partially_agree	Partially_agree	Strongly_disagree	Strongly_disagree	Agree	Moderate	Low	Moderate	Low	Low	Low	Moderate	Moderate	Moderate	Moderate	Moderate	Low	Moderate	Yes	No	No	No	No	No	No	No_impact	Agree	Disagree	Disagree	Strongly_disagree	Strongly_disagree	No_impact	Strongly_disagree	Disagree	Strongly_disagree	Partially_agree	Partially_agree	Partially_disagree	Strongly_agree	Agree	Partially_agree	Strongly_agree	No	No	Yes	No	No
262	Very_confident	A_combination	Agree	Unsure	Agree	Partially_agree	Unsure	High	High	High	Low	Low	High	High	High	High	High	Moderate	Moderate	Very_high	Yes	No	Yes	Yes	No	Yes	No	Mostly_negative	Agree	Unsure	Partially_agree	Unsure	Partially_agree	Mostly_negative	Partially_agree	Partially_agree	Partially_disagree	Disagree	Agree	Partially_agree	Partially_agree	Disagree	Partially_agree	Strongly_disagree	No	No	No	Yes	Yes
263	Fairly_confident	A_combination	Partially_agree	Partially_disagree	Partially_agree	Partially_agree	Disagree	High	Moderate	High	Moderate	Moderate	Moderate	High	Moderate	High	Moderate	Moderate	Moderate	Moderate	No	No	No	Yes	No	No	No	Positive	Strongly_agree	Partially_agree	Agree	Partially_disagree	Partially_agree	Mostly_positive	Unsure	Partially_agree	Unsure	Partially_agree	Partially_agree	Agree	Strongly_agree	Partially_agree	Agree	Disagree	No	No	Yes	Yes	Yes
264	Fairly_confident	A_combination	Agree	Agree	Partially_agree	Partially_agree	Partially_agree	Moderate	High	High	Moderate	Moderate	High	Moderate	Moderate	Moderate	Moderate	Moderate	Moderate	Moderate	Yes	No	No	No	No	Yes	No	No_impact	Agree	Disagree	Agree	Disagree	Disagree	No_impact	Disagree	Agree	Partially_disagree	Partially_agree	Partially_agree	Agree	Agree	Agree	Agree	Agree	No	No	No	Yes	I_don't_know
265	Fairly_confident	Human_activity	Agree	Unsure	Partially_agree	Partially_disagree	Disagree	Moderate	High	Moderate	Moderate	Moderate	Low	Moderate	High	High	Moderate	Moderate	NoAnswer	Moderate	Yes	No	No	No	No	No	No	Positive	Strongly_agree	Agree	Unsure	Agree	Disagree	Mostly_positive	Agree	Partially_agree	Unsure	Disagree	Agree	Partially_agree	Strongly_agree	Agree	Agree	Partially_disagree	Yes	Yes	Yes	Yes	I_don't_know
266	Not_confident_at_all	Natural_patterns	Partially_agree	Agree	Disagree	Disagree	Partially_agree	Very_low	Low	Low	Low	Low	Low	Low	Low	Low	Low	Low	Low	Low	No	No	No	No	No	No	No	No_impact	Agree	Disagree	Partially_agree	Partially_agree	Disagree	No_impact	Disagree	Disagree	Disagree	Disagree	Partially_agree	Disagree	Strongly_agree	Agree	Unsure	Agree	Yes	Yes	No	Yes	Yes
267	Not_too_confident	A_combination	Partially_agree	Partially_agree	Agree	Agree	Unsure	Moderate	High	High	Don’t_know	Moderate	High	High	Very_high	Very_high	Very_high	High	Very_high	High	Yes	No	No	Yes	No	No	No	Mostly_positive	Strongly_agree	Strongly_agree	Strongly_agree	Disagree	Agree	Mostly_positive	Strongly_agree	Unsure	Unsure	Disagree	Partially_agree	Agree	Partially_disagree	Partially_agree	Strongly_agree	Disagree	No	No	Yes	Yes	Yes
268	Fairly_confident	A_combination	Agree	Unsure	Partially_disagree	Partially_disagree	Partially_disagree	High	High	High	High	High	High	High	Very_high	High	High	High	Moderate	High	No	No	No	No	No	No	No	Mostly_positive	Agree	Partially_agree	Unsure	Partially_agree	Disagree	Mostly_positive	Agree	Agree	Partially_agree	Disagree	Disagree	Agree	Agree	Disagree	Disagree	Agree	No	Yes	Yes	I_don't_know	No
269	Very_confident	Human_activity	Partially_agree	Disagree	Agree	Partially_agree	Disagree	Moderate	High	Very_high	Very_high	Very_high	High	High	Very_high	Very_high	High	High	NoAnswer	Moderate	No	No	Yes	Yes	No	Yes	Don’t_know	Mostly_negative	Strongly_agree	Agree	Partially_agree	Disagree	Agree	Mostly_negative	Agree	Agree	Strongly_agree	Unsure	Partially_agree	Unsure	Disagree	Disagree	Unsure	Strongly_disagree	No	No	Yes	No	No
270	Fairly_confident	A_combination	Agree	Disagree	Agree	Agree	Disagree	High	Very_high	High	Moderate	Very_high	Moderate	Moderate	High	High	Moderate	High	Very_high	High	No	No	No	No	No	No	No	Mostly_positive	Agree	Agree	Partially_agree	Unsure	Unsure	No_impact	Agree	Agree	Partially_agree	Strongly_disagree	Strongly_disagree	Partially_agree	Strongly_disagree	Strongly_disagree	Unsure	Partially_agree	No	No	No	Yes	No
271	Not_confident_at_all	Natural_patterns	Partially_agree	Strongly_agree	Unsure	Strongly_disagree	Strongly_agree	Low	Very_low	Moderate	High	High	Moderate	Low	Moderate	Moderate	Moderate	High	Moderate	Low	No	No	No	No	No	No	No	No_impact	Strongly_agree	Strongly_disagree	Disagree	Disagree	Unsure	No_impact	Unsure	Unsure	Unsure	Disagree	Disagree	Unsure	Strongly_agree	Strongly_disagree	Strongly_agree	Strongly_agree	No	No	No	No	No
272	Fairly_confident	Human_activity	Agree	Partially_agree	Agree	Partially_agree	Agree	Moderate	High	Moderate	Low	Moderate	Very_low	Low	Low	Very_low	Low	Moderate	NoAnswer	Low	No	No	No	Yes	Don’t_know	No	Don’t_know	Mostly_positive	Strongly_agree	Agree	Agree	Partially_agree	Partially_agree	Mostly_negative	Partially_disagree	Agree	Agree	Partially_disagree	Partially_disagree	Unsure	Partially_agree	Agree	Agree	Unsure	I_don't_know	Yes	No	I_don't_know	I_don't_know
273	Fairly_confident	A_combination	Unsure	Partially_agree	Partially_agree	Partially_disagree	Partially_agree	High	Moderate	Moderate	Moderate	Moderate	High	Moderate	Moderate	High	Moderate	Moderate	Moderate	Moderate	No	No	No	Yes	No	No	Don’t_know	Mostly_positive	Agree	Partially_disagree	Agree	Disagree	Partially_disagree	Mostly_positive	Agree	Partially_agree	Partially_agree	Strongly_disagree	Disagree	Agree	Partially_agree	Unsure	Partially_agree	Unsure	No	Yes	Yes	Yes	I_don't_know
274	Very_confident	A_combination	Partially_agree	Unsure	Partially_agree	Partially_agree	Unsure	Moderate	Moderate	Moderate	Low	Moderate	Moderate	Moderate	Moderate	Moderate	Moderate	Moderate	Moderate	Low	No	No	No	Yes	No	No	No	Mostly_negative	Strongly_agree	Partially_disagree	Unsure	Disagree	Unsure	Mostly_positive	Partially_agree	Partially_agree	Partially_disagree	Strongly_disagree	Partially_disagree	Agree	Agree	Agree	Partially_agree	Partially_agree	No	Yes	Yes	I_don't_know	I_don't_know
275	Fairly_confident	A_combination	Partially_agree	Unsure	Partially_disagree	Partially_disagree	Unsure	Moderate	Low	Moderate	Very_low	Moderate	Very_low	Moderate	Low	Moderate	Moderate	Moderate	Moderate	Low	No	No	No	Yes	No	No	No	No_impact	Strongly_agree	Disagree	Disagree	Agree	Disagree	No_impact	Disagree	Disagree	Disagree	Strongly_disagree	Agree	Disagree	Agree	Disagree	Partially_agree	Strongly_disagree	No	I_don't_know	No	I_don't_know	I_don't_know
276	Not_too_confident	Natural_patterns	Unsure	Partially_disagree	Unsure	Disagree	Partially_agree	Moderate	Moderate	High	Low	Moderate	Moderate	Moderate	Low	Low	Moderate	High	Low	Low	No	No	No	No	No	No	No	No_impact	Strongly_agree	Partially_disagree	Partially_agree	Agree	Disagree	Mostly_positive	Strongly_agree	Agree	Unsure	Disagree	Disagree	Agree	Disagree	Disagree	Agree	Disagree	No	No	No	No	Yes
277	Fairly_confident	A_combination	Partially_agree	Partially_disagree	Agree	Partially_agree	Partially_agree	Moderate	High	High	High	High	High	High	High	High	High	High	High	High	No	No	Yes	Yes	No	No	No	Mostly_positive	Strongly_agree	Agree	Partially_agree	Disagree	Partially_agree	Mostly_negative	Agree	Agree	Agree	Disagree	Disagree	Agree	Agree	Unsure	Agree	Strongly_disagree	No	No	No	Yes	Yes
278	Not_too_confident	NoAnswer	NoAnswer	NoAnswer	NoAnswer	NoAnswer	NoAnswer	NoAnswer	NoAnswer	NoAnswer	NoAnswer	NoAnswer	NoAnswer	NoAnswer	NoAnswer	NoAnswer	NoAnswer	NoAnswer	NoAnswer	NoAnswer	No	No	No	No	No	No	No	Mostly_positive	Strongly_agree	Disagree	Partially_agree	Partially_disagree	Disagree	No_impact	Unsure	Unsure	Disagree	Partially_disagree	Partially_disagree	Disagree	Partially_agree	Disagree	Unsure	Unsure	I_don't_know	I_don't_know	Yes	Yes	No
279	Fairly_confident	Human_activity	Unsure	Partially_agree	Partially_agree	Unsure	Disagree	High	Moderate	Very_high	High	High	Moderate	High	High	High	Moderate	High	Low	High	No	No	Don’t_know	Yes	No	Yes	Yes	Mostly_positive	Strongly_agree	Agree	Partially_agree	Disagree	Strongly_agree	Mostly_negative	Partially_agree	Partially_agree	Unsure	Unsure	Partially_disagree	Agree	Agree	Unsure	Agree	Disagree	No	I_don't_know	Yes	No	I_don't_know
280	Fairly_confident	A_combination	Strongly_agree	Partially_agree	Agree	Strongly_agree	Agree	High	High	Very_high	Moderate	Moderate	High	Moderate	Moderate	Low	Very_high	Moderate	Moderate	High	Yes	Yes	No	No	No	No	Yes	Mostly_negative	Agree	Partially_agree	Partially_agree	Partially_agree	Unsure	No_impact	Partially_agree	Unsure	Unsure	Disagree	Disagree	Agree	Partially_agree	Partially_disagree	Agree	Partially_disagree	Yes	Yes	I_don't_know	Yes	Yes
281	Not_too_confident	A_combination	Partially_agree	Unsure	Unsure	Partially_agree	Partially_disagree	High	Moderate	Moderate	Moderate	Moderate	High	Moderate	Moderate	High	High	High	Moderate	Moderate	No	No	No	Yes	No	No	No	No_impact	Agree	Partially_agree	Partially_agree	Disagree	Agree	Mostly_positive	Unsure	Partially_agree	Partially_agree	Partially_agree	Unsure	Agree	Partially_agree	Partially_agree	Agree	Agree	No	Yes	No	Yes	No
282	Fairly_confident	A_combination	Partially_agree	Partially_agree	Partially_agree	Disagree	Partially_agree	Moderate	Moderate	Moderate	Moderate	Moderate	Moderate	Moderate	Moderate	Low	Low	Moderate	Low	Low	No	No	No	No	No	No	No	No_impact	Agree	Partially_agree	Partially_disagree	Partially_agree	Unsure	No_impact	Unsure	Unsure	Unsure	Partially_agree	Unsure	Unsure	Partially_agree	Unsure	Unsure	Partially_agree	No	No	No	No	No
283	Very_confident	A_combination	Partially_agree	Disagree	Agree	Agree	Agree	Moderate	High	High	High	Moderate	Moderate	Moderate	High	High	Don’t_know	High	Moderate	High	Yes	No	No	Yes	No	Yes	No	Mostly_positive	Agree	Agree	Agree	Partially_disagree	Unsure	Mostly_positive	Agree	Agree	Agree	Unsure	Partially_disagree	Agree	Partially_agree	Partially_agree	Agree	Disagree	No	Yes	Yes	Yes	Yes
284	Very_confident	A_combination	Agree	Agree	Strongly_agree	Partially_agree	Partially_disagree	High	Moderate	Moderate	Low	High	High	Moderate	High	Moderate	Low	Moderate	Moderate	NoAnswer	No	No	No	No	No	No	No	No_impact	Strongly_agree	Strongly_agree	Strongly_agree	Partially_agree	Partially_agree	Mostly_negative	Strongly_agree	Agree	Disagree	Unsure	Disagree	Disagree	Partially_agree	Disagree	Agree	Agree	No	No	No	No	No
285	Fairly_confident	A_combination	Agree	Agree	Partially_agree	Agree	Unsure	High	High	High	High	High	High	High	High	High	High	High	High	High	Yes	No	No	Yes	No	No	No	No_impact	Strongly_agree	Partially_agree	Strongly_agree	Strongly_disagree	Partially_agree	Mostly_positive	Partially_agree	Agree	Agree	Partially_agree	Unsure	Agree	Strongly_agree	Disagree	Strongly_agree	Strongly_disagree	No	Yes	Yes	No	Yes
286	Very_confident	NoAnswer	NoAnswer	NoAnswer	NoAnswer	NoAnswer	NoAnswer	NoAnswer	NoAnswer	NoAnswer	NoAnswer	NoAnswer	NoAnswer	NoAnswer	NoAnswer	NoAnswer	NoAnswer	NoAnswer	NoAnswer	NoAnswer	No	No	Yes	Yes	No	No	Yes	Mostly_positive	Agree	Agree	Partially_agree	Agree	Disagree	Mostly_negative	Strongly_agree	Agree	Disagree	Disagree	NoAnswer	NoAnswer	NoAnswer	NoAnswer	NoAnswer	NoAnswer	NoAnswer	NoAnswer	NoAnswer	NoAnswer	NoAnswer
287	Very_confident	A_combination	Agree	Partially_agree	Partially_agree	Partially_agree	Strongly_disagree	High	Don’t_know	Don’t_know	High	High	Don’t_know	High	High	High	Don’t_know	Don’t_know	Don’t_know	Don’t_know	No	No	No	No	No	No	No	No_impact	Strongly_agree	Agree	Unsure	Disagree	Disagree	No_impact	Agree	Unsure	Partially_agree	Disagree	Unsure	Unsure	Agree	Unsure	Strongly_agree	Unsure	No	Yes	Yes	Yes	No
288	Fairly_confident	A_combination	Strongly_agree	Agree	Partially_agree	Strongly_disagree	Strongly_agree	Moderate	High	Moderate	Moderate	Moderate	Moderate	Moderate	Very_low	Moderate	Moderate	Moderate	Moderate	Very_low	No	No	No	No	No	No	No	Positive	Agree	Strongly_disagree	Strongly_disagree	Strongly_agree	Strongly_disagree	Positive	Strongly_disagree	Strongly_disagree	Strongly_disagree	Strongly_agree	Agree	Partially_agree	Strongly_agree	Strongly_agree	Partially_agree	Agree	Yes	Yes	No	No	Yes
289	Not_too_confident	Natural_patterns	Partially_agree	Agree	Partially_agree	Partially_disagree	Partially_agree	Moderate	Moderate	Low	Very_low	Moderate	Low	High	High	Moderate	Low	Low	Low	Low	No	No	No	Yes	No	No	No	No_impact	Strongly_agree	Partially_disagree	Disagree	Agree	Strongly_disagree	No_impact	Partially_agree	Disagree	Strongly_disagree	Unsure	Unsure	Partially_agree	Agree	Partially_agree	Strongly_agree	Strongly_disagree	No	Yes	No	I_don't_know	Yes
290	Very_confident	Not_sure	Partially_agree	Disagree	Agree	Agree	Disagree	High	High	High	High	High	High	Moderate	High	High	High	High	High	Very_high	Yes	Yes	No	Yes	No	No	No	No_impact	Strongly_agree	Agree	Agree	Partially_agree	Strongly_agree	Mostly_negative	Unsure	Agree	Agree	Partially_agree	Partially_disagree	Partially_agree	Agree	Partially_disagree	Agree	Disagree	No	Yes	No	I_don't_know	No
291	Fairly_confident	A_combination	Partially_agree	Unsure	Partially_agree	Partially_disagree	Partially_disagree	Moderate	High	High	Moderate	Moderate	High	High	High	High	High	High	Moderate	Very_high	No	No	No	No	No	No	No	No_impact	Agree	Partially_agree	Agree	Partially_agree	Unsure	Mostly_negative	Partially_agree	Partially_agree	Unsure	Unsure	Strongly_disagree	Strongly_agree	Partially_disagree	Partially_disagree	Strongly_agree	Partially_agree	No	No	Yes	Yes	Yes
292	Fairly_confident	A_combination	Partially_agree	Partially_agree	Unsure	Unsure	Partially_disagree	High	High	High	High	High	High	High	High	High	High	High	High	High	No	No	No	Yes	No	No	No	Mostly_positive	Agree	Partially_agree	Partially_agree	Partially_agree	Unsure	Mostly_positive	Partially_agree	Agree	Partially_agree	Disagree	Disagree	Agree	Partially_agree	Partially_disagree	Agree	Partially_disagree	No	I_don't_know	Yes	No	Yes
293	Fairly_confident	NoAnswer	NoAnswer	NoAnswer	NoAnswer	NoAnswer	NoAnswer	NoAnswer	NoAnswer	NoAnswer	NoAnswer	NoAnswer	NoAnswer	NoAnswer	NoAnswer	NoAnswer	NoAnswer	NoAnswer	NoAnswer	NoAnswer	Yes	No	Don’t_know	Yes	No	Don’t_know	No	No_impact	Agree	Partially_agree	Unsure	Agree	Disagree	Mostly_positive	Partially_agree	Partially_disagree	Strongly_disagree	Strongly_disagree	Agree	Agree	Agree	Partially_agree	Agree	Disagree	No	Yes	No	No	Yes
294	Very_confident	A_combination	Agree	Partially_disagree	Agree	Agree	Partially_disagree	Low	High	High	High	High	High	High	High	High	High	High	High	High	No	No	NoAnswer	Don’t_know	No	No	No	Mostly_negative	Agree	Agree	Unsure	Disagree	Unsure	Mostly_negative	Agree	Agree	Agree	Unsure	Partially_disagree	Agree	Partially_agree	Unsure	Agree	Agree	Yes	Yes	No	Yes	Yes
295	Very_confident	Human_activity	Strongly_agree	Unsure	Agree	Partially_agree	Disagree	High	Moderate	Moderate	Low	Moderate	High	Moderate	High	Moderate	High	High	Moderate	High	No	No	No	Yes	No	No	No	Mostly_positive	Agree	Partially_agree	Partially_agree	Agree	Disagree	Mostly_positive	Partially_agree	Partially_agree	Disagree	Disagree	Unsure	Unsure	Strongly_agree	Unsure	Partially_agree	Unsure	No	Yes	Yes	No	No
296	Not_confident_at_all	Refused	Strongly_agree	Agree	Strongly_disagree	Strongly_disagree	Strongly_agree	Very_low	Very_low	High	Very_low	Moderate	Moderate	Very_low	Very_low	Low	Moderate	Moderate	Don’t_know	Very_low	No	No	No	No	No	No	No	No_impact	Partially_agree	Strongly_disagree	Strongly_disagree	Partially_agree	Strongly_disagree	No_impact	Strongly_disagree	Strongly_disagree	Strongly_disagree	NoAnswer	NoAnswer	NoAnswer	NoAnswer	NoAnswer	NoAnswer	NoAnswer	NoAnswer	NoAnswer	NoAnswer	NoAnswer	NoAnswer
297	Fairly_confident	A_combination	Partially_disagree	Disagree	Agree	Agree	Agree	High	Very_high	High	High	High	Low	Very_high	Very_high	Very_high	High	Low	Low	High	No	No	Yes	Yes	No	No	Yes	No_impact	Strongly_agree	Strongly_agree	Strongly_agree	Strongly_disagree	Partially_disagree	Mostly_negative	Agree	Agree	Agree	Disagree	Disagree	Agree	Strongly_agree	Agree	Strongly_agree	Agree	Yes	No	Yes	Yes	I_don't_know
298	Fairly_confident	A_combination	Partially_agree	Partially_disagree	Partially_agree	Disagree	Unsure	High	Very_high	Moderate	Moderate	Low	Moderate	High	High	High	Low	Moderate	Low	Low	No	No	No	Yes	No	Don’t_know	Don’t_know	No_impact	Strongly_agree	Partially_disagree	Partially_disagree	Disagree	Disagree	Mostly_positive	Partially_agree	Unsure	Disagree	Strongly_disagree	Partially_agree	Partially_agree	Agree	Partially_agree	Strongly_agree	Partially_agree	Yes	I_don't_know	Yes	I_don't_know	Yes
299	Fairly_confident	A_combination	Disagree	Partially_agree	Unsure	Unsure	Unsure	Low	Moderate	Moderate	Low	Low	Low	Moderate	Don’t_know	Low	Low	Low	Low	Low	No	No	No	No	No	No	No	No_impact	Unsure	Unsure	Unsure	Partially_disagree	Partially_disagree	No_impact	Partially_disagree	Partially_disagree	Unsure	Unsure	Partially_agree	Unsure	Partially_agree	Partially_agree	Agree	Disagree	No	Yes	No	No	No
300	Very_confident	Human_activity	Strongly_agree	Agree	Agree	Agree	Disagree	Very_high	High	Very_high	High	Low	Moderate	High	High	High	Moderate	Moderate	Moderate	High	Yes	No	No	No	No	No	No	Positive	Strongly_agree	Strongly_agree	Strongly_agree	Partially_disagree	Disagree	Mostly_positive	Strongly_agree	Strongly_agree	Agree	Partially_disagree	Agree	Strongly_agree	Strongly_agree	Strongly_agree	Strongly_agree	Strongly_disagree	No	Yes	Yes	Yes	No
301	Not_too_confident	A_combination	Partially_disagree	Unsure	Unsure	Unsure	Partially_agree	Don’t_know	Don’t_know	Don’t_know	Don’t_know	Don’t_know	Don’t_know	Don’t_know	Don’t_know	Don’t_know	Don’t_know	Don’t_know	Don’t_know	Don’t_know	No	No	No	No	No	No	Yes	No_impact	Agree	Unsure	Unsure	Disagree	Unsure	No_impact	Unsure	Unsure	Unsure	Disagree	Unsure	Partially_agree	Partially_agree	Unsure	Partially_agree	Agree	Yes	Yes	I_don’t_know	I_don’t_know	Yes
302	Not_too_confident	A_combination	Partially_agree	Agree	Partially_agree	Partially_disagree	Strongly_agree	Moderate	Moderate	Moderate	Moderate	Moderate	Don’t_know	Moderate	Low	Moderate	Moderate	Moderate	Moderate	Moderate	No	No	No	No	No	No	No	Mostly_positive	Strongly_agree	Partially_disagree	Unsure	Disagree	Agree	Mostly_positive	Partially_agree	Agree	Unsure	NoAnswer	Partially_agree	Strongly_agree	Strongly_agree	Agree	Strongly_agree	Agree	No	Yes	No	Yes	I_don't_know
303	Fairly_confident	A_combination	Partially_agree	Partially_agree	Partially_agree	Unsure	Partially_agree	Low	Low	Low	Very_low	Moderate	Moderate	Moderate	Moderate	Moderate	Moderate	Moderate	Moderate	High	No	No	Yes	Yes	No	No	No	No_impact	Agree	Agree	Agree	Disagree	Unsure	No_impact	Agree	Agree	Partially_agree	Partially_agree	Disagree	Partially_agree	Agree	Partially_agree	Partially_agree	Agree	I_don't_know	No	Yes	I_don't_know	I_don't_know
304	Very_confident	Natural_patterns	Agree	Unsure	Agree	Partially_agree	Disagree	High	Moderate	High	Moderate	Moderate	High	Moderate	High	High	High	Moderate	Moderate	Moderate	Yes	Yes	No	Yes	No	No	No	Positive	Agree	Agree	Agree	Agree	Partially_disagree	Positive	Agree	Partially_agree	Disagree	Partially_agree	Partially_agree	Agree	Agree	Agree	Agree	Disagree	No	Yes	No	No	I_don't_know
305	Not_too_confident	A_combination	Agree	Agree	Partially_disagree	Partially_agree	Agree	Moderate	Moderate	Low	Low	Low	Moderate	Moderate	High	Moderate	Moderate	Moderate	Low	Moderate	No	No	No	Yes	No	No	No	Mostly_positive	Agree	Agree	Strongly_agree	Partially_agree	Disagree	Mostly_positive	Agree	Partially_agree	Agree	Agree	Partially_agree	Partially_agree	Agree	Agree	Agree	Agree	No	Yes	Yes	Yes	Yes
306	Not_confident_at_all	Natural_patterns	Strongly_agree	Agree	Disagree	Disagree	Strongly_disagree	Moderate	Moderate	Moderate	Moderate	Moderate	Moderate	Moderate	Moderate	Moderate	Moderate	Moderate	Moderate	Moderate	No	No	No	No	No	No	No	No_impact	Strongly_disagree	Strongly_disagree	Strongly_disagree	Strongly_disagree	Strongly_disagree	No_impact	Disagree	Disagree	Disagree	Strongly_disagree	Strongly_disagree	Strongly_disagree	Partially_agree	Disagree	Partially_disagree	Agree	No	No	No	No	No
307	Not_too_confident	A_combination	Unsure	Unsure	Unsure	Unsure	Unsure	Moderate	Moderate	Moderate	Moderate	Moderate	Moderate	Moderate	Moderate	Moderate	Moderate	Moderate	Moderate	Moderate	No	No	No	Yes	No	No	No	Positive	Agree	Agree	Agree	Unsure	Unsure	No_impact	Partially_agree	Partially_agree	Partially_agree	Unsure	Unsure	Unsure	Unsure	Unsure	Unsure	Unsure	Yes	Yes	I_don't_know	Yes	Yes
308	Fairly_confident	A_combination	Partially_agree	Agree	Unsure	Partially_disagree	Partially_agree	Low	High	High	Low	Low	Low	High	High	High	High	High	High	Moderate	No	No	No	Yes	No	Yes	No	No_impact	Partially_agree	Partially_disagree	Partially_disagree	Partially_disagree	Disagree	No_impact	Partially_disagree	Partially_disagree	Partially_disagree	Disagree	Disagree	Partially_agree	Agree	Unsure	Partially_agree	Unsure	No	Yes	I_don't_know	Yes	Yes
309	Fairly_confident	A_combination	Agree	Unsure	Partially_agree	Agree	Disagree	High	High	Very_high	High	High	High	Very_high	Very_high	Very_high	Very_high	Very_high	Very_high	Very_high	No	No	No	No	No	No	No	Mostly_positive	Agree	Unsure	Agree	Partially_agree	Unsure	Mostly_negative	Agree	Agree	Agree	Unsure	Unsure	Partially_agree	Partially_disagree	Unsure	Unsure	Partially_agree	No	I_don't_know	I_don't_know	Yes	Yes
310	Not_too_confident	A_combination	Partially_agree	Strongly_agree	Disagree	Disagree	Agree	Low	Very_low	Moderate	Very_low	Low	Moderate	Moderate	Low	Low	Low	High	Low	Low	No	No	No	No	No	No	No	Mostly_positive	Agree	Disagree	Partially_disagree	Agree	Strongly_disagree	Positive	Disagree	Disagree	Disagree	Unsure	Partially_disagree	Partially_agree	Partially_agree	Agree	Agree	Disagree	No	No	No	Yes	No
311	Very_confident	Human_activity	Agree	Agree	Agree	Agree	Unsure	Moderate	High	High	Don’t_know	Moderate	High	Moderate	High	Moderate	Moderate	Moderate	Moderate	Moderate	No	No	No	Yes	No	No	Yes	Mostly_positive	Agree	Unsure	Agree	Agree	Agree	Mostly_positive	Agree	Agree	Unsure	Unsure	Partially_agree	Agree	Agree	Unsure	Agree	Partially_agree	I_don't_know	No	Yes	Yes	Yes
312	Very_confident	Human_activity	Strongly_agree	Strongly_disagree	Agree	Agree	Disagree	Very_high	High	High	High	Very_high	Very_high	Very_high	High	Moderate	Moderate	Very_high	High	High	Yes	Yes	Don’t_know	Yes	No	Don’t_know	Don’t_know	Mostly_negative	Strongly_agree	Partially_agree	Partially_agree	Partially_disagree	Partially_agree	Mostly_negative	Agree	Agree	Agree	Agree	Disagree	Agree	Agree	Partially_disagree	Agree	Disagree	No	Yes	No	Yes	I_don't_know
313	Not_too_confident	A_combination	Unsure	Partially_agree	Partially_agree	Unsure	Unsure	Moderate	High	High	Moderate	Moderate	High	High	High	High	Moderate	Moderate	Moderate	Moderate	No	No	No	No	No	Don’t_know	No	No_impact	Strongly_disagree	Partially_disagree	Partially_disagree	Unsure	Unsure	No_impact	Unsure	Partially_agree	Unsure	Partially_disagree	Unsure	Unsure	Agree	Partially_agree	Agree	Partially_agree	No	I_don't_know	NoAnswer	Yes	I_don't_know
314	Fairly_confident	A_combination	Partially_agree	Partially_agree	Partially_agree	Unsure	Agree	Moderate	Low	Low	Low	Low	Moderate	Moderate	Moderate	Low	Moderate	Low	Very_low	Low	No	No	Don’t_know	Yes	No	No	No	No_impact	Strongly_agree	Unsure	Unsure	Partially_agree	Partially_disagree	No_impact	Partially_disagree	Unsure	Partially_disagree	Disagree	Disagree	Partially_agree	Agree	Agree	Unsure	Disagree	No	No	No	No	No
315	Not_too_confident	A_combination	Partially_agree	Strongly_agree	Strongly_disagree	Strongly_disagree	Agree	Low	Moderate	Moderate	Low	Low	Moderate	Moderate	Moderate	High	Moderate	Moderate	Low	Low	No	No	No	No	No	No	No	Positive	Strongly_agree	Partially_agree	Partially_agree	Strongly_agree	Strongly_disagree	No_impact	Partially_agree	Partially_agree	Strongly_disagree	Disagree	Disagree	Partially_agree	Agree	Partially_agree	Strongly_agree	Strongly_agree	No	Yes	No	No	Yes
316	Not_too_confident	Natural_patterns	Partially_agree	Agree	Unsure	Unsure	Partially_agree	Moderate	Moderate	Moderate	Moderate	Moderate	Moderate	Moderate	Moderate	Moderate	Moderate	Moderate	Moderate	Moderate	No	No	No	Yes	No	Don’t_know	No	No_impact	Partially_agree	Unsure	Partially_disagree	Agree	Unsure	Mostly_negative	Unsure	Unsure	Unsure	Unsure	Unsure	Partially_agree	Unsure	Unsure	Agree	Partially_disagree	NoAnswer	NoAnswer	NoAnswer	NoAnswer	NoAnswer
317	Very_confident	A_combination	Strongly_agree	Agree	Agree	Agree	Strongly_disagree	Very_high	Very_high	Very_high	Very_high	Very_high	Moderate	High	High	High	Very_high	High	High	High	Yes	No	No	Yes	No	No	No	No_impact	Strongly_agree	Strongly_agree	Strongly_agree	Disagree	Partially_agree	Mostly_negative	Agree	Agree	Agree	Agree	Disagree	Agree	Partially_agree	Unsure	Unsure	Partially_agree	No	Yes	Yes	I_don't_know	I_don't_know
318	Fairly_confident	Not_sure	Partially_disagree	Disagree	Partially_agree	Unsure	Unsure	Moderate	Moderate	Moderate	Moderate	Moderate	Moderate	Low	Moderate	Moderate	Moderate	Moderate	Moderate	Moderate	No	No	Don’t_know	Yes	No	No	No	No_impact	Agree	Unsure	Agree	Disagree	Partially_disagree	Mostly_negative	Unsure	Partially_agree	Partially_agree	Partially_disagree	Unsure	Partially_agree	Disagree	Unsure	Partially_agree	Agree	No	I_don't_know	I_don't_know	I_don't_know	I_don't_know
319	Fairly_confident	A_combination	Partially_agree	Partially_agree	Partially_agree	Partially_disagree	Agree	Moderate	Low	Low	Low	Low	Moderate	Moderate	Low	Moderate	Moderate	Low	Low	Low	No	No	No	No	No	No	No	Positive	Partially_agree	Partially_disagree	Agree	Disagree	Disagree	Positive	Partially_agree	Partially_disagree	Disagree	Unsure	Agree	Partially_disagree	Agree	Unsure	Agree	Unsure	No	Yes	Yes	No	No
320	Fairly_confident	A_combination	Unsure	Partially_disagree	Partially_agree	Partially_agree	Disagree	High	High	High	High	Moderate	High	High	High	High	High	High	High	High	No	No	No	No	No	No	No	No_impact	Strongly_agree	Partially_agree	Strongly_agree	Partially_disagree	Unsure	Mostly_negative	Agree	Agree	Agree	Disagree	Agree	Partially_agree	Partially_disagree	Disagree	Partially_agree	Unsure	No	I_don't_know	Yes	Yes	I_don't_know
321	Very_confident	NoAnswer	NoAnswer	NoAnswer	NoAnswer	NoAnswer	NoAnswer	NoAnswer	NoAnswer	NoAnswer	NoAnswer	NoAnswer	NoAnswer	NoAnswer	NoAnswer	NoAnswer	NoAnswer	NoAnswer	NoAnswer	NoAnswer	Yes	Yes	Yes	Yes	No	Yes	Yes	Positive	Strongly_agree	Disagree	Strongly_agree	Unsure	Partially_agree	Mostly_positive	Unsure	Strongly_agree	Unsure	Disagree	Disagree	Strongly_agree	Strongly_agree	Partially_agree	Strongly_agree	Disagree	No	I_don't_know	I_don't_know	No	I_don't_know
322	Very_confident	Human_activity	Agree	Partially_disagree	Strongly_agree	Agree	Disagree	Very_high	Very_high	Moderate	High	Very_high	Moderate	Very_high	Very_high	Very_high	Moderate	High	Very_high	High	No	Yes	No	No	No	No	No	Mostly_negative	Strongly_agree	Partially_agree	Agree	Disagree	Unsure	Mostly_negative	Agree	Strongly_agree	Strongly_agree	Disagree	Disagree	Agree	Partially_agree	Strongly_agree	Agree	Unsure	No	I_don't_know	Yes	Yes	No
323	Fairly_confident	A_combination	Unsure	Agree	Partially_agree	Unsure	Partially_disagree	Moderate	Moderate	Moderate	Moderate	Moderate	Moderate	Moderate	Moderate	High	Moderate	Moderate	Moderate	High	No	No	No	No	No	No	No	No_impact	Agree	Unsure	Partially_agree	Unsure	Unsure	No_impact	Unsure	Partially_agree	Unsure	Disagree	Partially_disagree	Partially_agree	Agree	Partially_disagree	Agree	Strongly_agree	I_don't_know	Yes	No	Yes	No
324	Not_too_confident	A_combination	Partially_disagree	Disagree	Unsure	Partially_disagree	Partially_agree	Low	Low	Low	Very_low	Low	Low	Low	Moderate	Low	Low	Moderate	Very_low	Very_low	Yes	No	No	Yes	No	No	No	No_impact	Agree	Disagree	Partially_agree	Agree	Disagree	No_impact	Partially_disagree	Partially_disagree	Disagree	Partially_agree	Partially_agree	Partially_agree	Agree	Agree	Agree	Partially_disagree	No	Yes	No	No	No
325	Not_confident_at_all	Natural_patterns	Partially_agree	Agree	Disagree	Strongly_disagree	Strongly_agree	Very_low	Low	Low	Low	Low	Low	Low	Low	Low	Low	Low	Very_low	Low	No	No	No	No	No	No	No	No_impact	Strongly_agree	Partially_disagree	Partially_agree	Unsure	Disagree	No_impact	Strongly_disagree	Strongly_disagree	Strongly_disagree	Strongly_disagree	Unsure	Strongly_disagree	Agree	Strongly_disagree	Agree	Unsure	I_don't_know	Yes	Yes	No	No
326	Fairly_confident	A_combination	Unsure	Partially_agree	Agree	Partially_agree	Disagree	Low	High	High	High	High	Don’t_know	High	High	High	High	High	High	High	No	No	No	Don’t_know	No	No	Don’t_know	No_impact	Partially_agree	Agree	Partially_agree	Unsure	Unsure	No_impact	Agree	Agree	Agree	Unsure	Unsure	Unsure	Unsure	Unsure	Unsure	Partially_agree	I_don't_know	I_don't_know	No	I_don't_know	I_don't_know
327	Very_confident	Human_activity	Agree	Partially_disagree	Agree	Partially_agree	Disagree	High	Very_high	High	High	High	Moderate	High	High	High	High	High	High	High	Yes	No	No	Yes	No	No	No	No_impact	Agree	Unsure	Agree	Disagree	Unsure	Mostly_negative	Partially_agree	Agree	Agree	Partially_agree	Disagree	Agree	Agree	Partially_disagree	Agree	Disagree	Yes	Yes	Yes	I_don't_know	I_don't_know
328	Not_too_confident	A_combination	Unsure	Disagree	Partially_disagree	Disagree	Partially_agree	Moderate	Low	Low	Low	Low	High	Low	Low	Low	Low	Low	Low	Low	No	No	No	Don’t_know	No	No	No	No_impact	Strongly_agree	Disagree	Disagree	Disagree	Disagree	No_impact	Disagree	Disagree	Partially_agree	Partially_disagree	Disagree	Unsure	Partially_agree	Disagree	Disagree	Unsure	No	I_don't_know	No	No	No
329	Very_confident	Human_activity	Agree	Disagree	Strongly_agree	Agree	Disagree	Very_high	High	High	High	High	Very_high	High	High	High	High	High	High	High	No	No	No	No	No	Yes	Yes	Mostly_positive	Strongly_agree	Agree	Agree	Strongly_disagree	Partially_agree	Mostly_negative	Agree	Strongly_agree	Partially_agree	Unsure	Unsure	Unsure	Strongly_agree	Partially_disagree	Partially_agree	Unsure	I_don't_know	Yes	Yes	Yes	I_don't_know
330	Not_confident_at_all	NoAnswer	NoAnswer	NoAnswer	NoAnswer	NoAnswer	NoAnswer	NoAnswer	NoAnswer	NoAnswer	NoAnswer	NoAnswer	NoAnswer	NoAnswer	NoAnswer	NoAnswer	NoAnswer	NoAnswer	NoAnswer	NoAnswer	No	No	No	No	No	No	No	Mostly_positive	Strongly_agree	Strongly_disagree	Strongly_disagree	Strongly_agree	Strongly_disagree	Positive	Strongly_disagree	Strongly_disagree	Strongly_disagree	Strongly_disagree	Strongly_disagree	Strongly_disagree	Agree	Strongly_disagree	Agree	Agree	No	Yes	No	No	No
331	Fairly_confident	A_combination	Unsure	Partially_disagree	Partially_disagree	Partially_agree	Agree	High	Moderate	Moderate	Moderate	Moderate	High	High	High	High	High	Moderate	Moderate	High	No	No	No	Yes	No	No	No	Mostly_negative	Agree	Partially_agree	Partially_agree	Unsure	Unsure	Mostly_negative	Agree	Agree	Partially_agree	Unsure	Unsure	Agree	Unsure	Partially_agree	Unsure	Agree	Yes	I_don't_know	Yes	I_don't_know	Yes
332	Very_confident	A_combination	Partially_agree	Partially_disagree	Partially_agree	Partially_agree	Partially_disagree	Moderate	Moderate	Moderate	Moderate	Moderate	Moderate	Moderate	Moderate	Moderate	Moderate	Moderate	Moderate	Moderate	Yes	Yes	No	Yes	No	No	No	Mostly_negative	Agree	Agree	Agree	Partially_disagree	Partially_disagree	Mostly_negative	Agree	Agree	Agree	Partially_agree	Partially_agree	Partially_agree	Partially_agree	Partially_agree	Partially_agree	Partially_disagree	Yes	Yes	Yes	Yes	Yes
333	Not_too_confident	A_combination	Unsure	Partially_agree	Partially_agree	Partially_agree	Partially_agree	Moderate	Moderate	Moderate	Moderate	Moderate	Moderate	Moderate	Moderate	Moderate	Moderate	Moderate	Moderate	Moderate	Yes	Yes	No	Yes	No	Yes	No	Mostly_positive	Unsure	Unsure	Unsure	Unsure	Unsure	Mostly_positive	Partially_agree	Partially_agree	Partially_agree	Partially_agree	Unsure	Agree	Agree	Partially_agree	Partially_agree	Partially_agree	No	Yes	Yes	I_don't_know	I_don't_know
334	Fairly_confident	Human_activity	Partially_agree	Partially_disagree	Agree	Partially_agree	Disagree	High	High	Very_high	Very_high	Very_high	Very_high	High	Very_high	High	Very_high	Very_high	High	High	No	No	No	Yes	No	No	No	Mostly_positive	Strongly_agree	Agree	Unsure	Partially_agree	Partially_disagree	Mostly_positive	Agree	Agree	Agree	Disagree	Disagree	Agree	Strongly_agree	Unsure	Agree	Partially_agree	No	Yes	Yes	Yes	I_don't_know
335	Not_too_confident	Natural_patterns	Agree	Agree	Disagree	Disagree	Unsure	Low	Moderate	Moderate	Moderate	Low	Moderate	High	Moderate	High	Low	Moderate	Moderate	Low	No	No	No	Yes	No	No	No	No_impact	Strongly_agree	Disagree	Unsure	Disagree	Disagree	No_impact	Unsure	Disagree	Disagree	Unsure	Unsure	Unsure	Strongly_agree	Unsure	Agree	Disagree	No	No	Yes	Yes	Yes
336	Fairly_confident	A_combination	Partially_agree	Partially_agree	Agree	Partially_agree	Agree	Moderate	Low	High	Low	Moderate	Low	Moderate	Moderate	Moderate	High	Moderate	Low	Moderate	No	No	No	Yes	No	Yes	No	No_impact	Strongly_agree	Partially_agree	Partially_disagree	Disagree	Disagree	No_impact	Partially_agree	Partially_agree	Unsure	Partially_agree	Unsure	Partially_agree	Agree	Agree	Agree	Partially_agree	No	Yes	Yes	I_don't_know	I_don't_know
337	Very_confident	Human_activity	Agree	Unsure	Strongly_agree	Partially_agree	Disagree	Very_high	Very_high	Very_high	Very_high	Very_high	Very_high	Very_high	Very_high	Very_high	Very_high	Very_high	Very_high	Very_high	No	No	No	Yes	No	No	No	Mostly_positive	Strongly_agree	Unsure	Agree	Unsure	Unsure	Mostly_positive	Agree	Agree	Agree	Disagree	Unsure	Agree	Strongly_agree	Partially_agree	Unsure	Agree	Yes	Yes	Yes	Yes	Yes
338	Not_too_confident	NoAnswer	NoAnswer	NoAnswer	NoAnswer	NoAnswer	NoAnswer	NoAnswer	NoAnswer	NoAnswer	NoAnswer	NoAnswer	NoAnswer	NoAnswer	NoAnswer	NoAnswer	NoAnswer	NoAnswer	NoAnswer	NoAnswer	No	No	No	Yes	No	No	No	Mostly_positive	Agree	Unsure	Agree	Agree	Partially_disagree	Mostly_positive	Agree	Agree	Disagree	Strongly_disagree	Unsure	Partially_disagree	Disagree	Disagree	Agree	Disagree	No	Yes	Yes	Yes	No
339	Very_confident	Human_activity	Agree	Partially_disagree	Agree	Agree	Disagree	High	High	High	High	Moderate	Moderate	High	High	High	High	High	Moderate	Moderate	No	No	Yes	No	No	No	No	Positive	Strongly_agree	Partially_agree	Partially_agree	Agree	Agree	Mostly_positive	Agree	Agree	Partially_agree	Partially_disagree	Partially_disagree	Agree	Agree	Partially_agree	Agree	Partially_agree	Yes	Yes	Yes	Yes	No
340	Not_too_confident	Natural_patterns	Partially_agree	Agree	Agree	Partially_agree	Agree	Moderate	High	Moderate	Low	Moderate	Moderate	Low	Low	Low	Moderate	Low	Low	Moderate	No	No	No	Yes	No	No	No	No_impact	Agree	Unsure	Unsure	Partially_disagree	Disagree	Mostly_positive	Unsure	Unsure	Partially_disagree	Unsure	Unsure	Unsure	Partially_agree	Unsure	Strongly_agree	Unsure	No	I_don't_know	No	Yes	I_don't_know
341	Very_confident	Human_activity	Strongly_agree	Strongly_disagree	Strongly_agree	Strongly_agree	Strongly_disagree	Very_high	High	High	High	High	Moderate	Very_high	Very_high	Very_high	Very_high	Very_high	Very_high	Very_high	Yes	No	No	Yes	No	No	No	Mostly_positive	Strongly_agree	Strongly_agree	Agree	Strongly_agree	Unsure	Mostly_positive	Strongly_agree	Strongly_agree	Partially_disagree	Partially_disagree	Partially_disagree	Agree	Partially_disagree	Strongly_disagree	Partially_agree	Partially_agree	Yes	No	Yes	Yes	No
342	Not_sure	A_combination	Unsure	Agree	Disagree	Unsure	Agree	Moderate	Moderate	Moderate	Very_low	Low	Low	Moderate	Moderate	Moderate	Moderate	Moderate	Moderate	Moderate	No	No	No	Yes	No	No	No	No_impact	Strongly_agree	Agree	Agree	Unsure	Unsure	No_impact	Agree	Agree	Partially_agree	Unsure	Unsure	Agree	Agree	Unsure	Agree	Unsure	No	No	Yes	No	No
343	Fairly_confident	Human_activity	Partially_agree	Unsure	Partially_agree	Disagree	Partially_agree	Moderate	High	Moderate	Low	Moderate	High	High	High	Moderate	Moderate	Moderate	High	High	No	No	No	No	No	No	No	No_impact	Strongly_agree	Partially_agree	Disagree	Unsure	Unsure	No_impact	Agree	Agree	Unsure	Partially_agree	Disagree	Agree	Partially_agree	Unsure	Agree	Partially_agree	No	I_don't_know	Yes	Yes	I_don't_know
344	Very_confident	Human_activity	Strongly_agree	Disagree	Partially_agree	Unsure	Disagree	Very_high	Very_high	Very_high	Very_high	Very_high	Very_high	Very_high	Very_high	Very_high	Very_high	Very_high	Very_high	Very_high	No	No	No	No	No	No	No	Mostly_positive	Agree	Strongly_agree	Unsure	Unsure	Disagree	No_impact	Agree	Agree	Partially_agree	Partially_disagree	Partially_agree	Unsure	Partially_agree	Partially_agree	Strongly_agree	Agree	No	Yes	Yes	I_don't_know	No
345	Not_too_confident	Natural_patterns	Partially_disagree	Partially_agree	Disagree	Disagree	Strongly_agree	Moderate	Low	Low	Low	Moderate	Low	Very_low	Moderate	High	Moderate	Low	High	Moderate	No	No	No	Yes	No	No	No	Mostly_positive	Agree	Disagree	Disagree	Disagree	Strongly_disagree	No_impact	Disagree	Partially_agree	Strongly_disagree	Strongly_disagree	Strongly_disagree	Agree	Agree	Unsure	Agree	Unsure	No	Yes	No	No	I_don't_know
346	Fairly_confident	Human_activity	NoAnswer	Agree	NoAnswer	NoAnswer	NoAnswer	High	High	High	High	High	High	Moderate	Moderate	Very_high	Very_high	Very_high	Very_high	Very_high	Yes	No	No	Yes	No	No	No	Mostly_positive	Strongly_agree	Agree	Strongly_agree	Unsure	Unsure	No_impact	Strongly_agree	Strongly_agree	Strongly_agree	Unsure	Disagree	Agree	Agree	Partially_agree	Strongly_agree	Agree	No	No	NoAnswer	No	Yes
347	Very_confident	Human_activity	Partially_disagree	Disagree	Agree	Agree	Disagree	High	High	High	High	High	Very_high	High	High	High	Very_high	High	High	High	Don’t_know	Don’t_know	No	No	No	No	No	Mostly_negative	Agree	Partially_agree	Agree	Partially_disagree	Unsure	Mostly_negative	Unsure	Agree	Agree	Disagree	Disagree	Partially_agree	Partially_disagree	Disagree	Unsure	Partially_disagree	No	No	No	I_don't_know	I_don't_know
348	Fairly_confident	Natural_patterns	Agree	Agree	Unsure	Disagree	Agree	Low	Moderate	High	Moderate	High	High	Moderate	Moderate	High	High	High	Moderate	High	No	No	No	No	No	No	No	Mostly_positive	Disagree	Unsure	Agree	Agree	Agree	Mostly_negative	Agree	Agree	Agree	Agree	Agree	Agree	Agree	Agree	Agree	Agree	Yes	Yes	Yes	Yes	Yes
349	Very_confident	A_combination	Partially_agree	Partially_disagree	Agree	Partially_agree	Disagree	Very_high	Very_high	Very_high	Don’t_know	Don’t_know	Very_high	Very_high	Very_high	Very_high	Very_high	High	High	High	Yes	No	No	Yes	No	Yes	Yes	Mostly_negative	Strongly_agree	Strongly_agree	Strongly_agree	Disagree	Agree	Negative	Strongly_agree	Strongly_agree	Strongly_agree	Disagree	Disagree	Agree	Agree	Disagree	Agree	Disagree	I_don't_know	I_don't_know	Yes	No	I_don't_know
350	Fairly_confident	Human_activity	Disagree	Partially_disagree	Agree	Partially_agree	Unsure	High	High	Moderate	Moderate	High	Moderate	High	High	Very_high	Low	Moderate	Moderate	High	Yes	No	No	Yes	No	No	No	No_impact	Agree	Unsure	Agree	Partially_disagree	Partially_disagree	Mostly_negative	Agree	Partially_agree	Partially_agree	Disagree	Disagree	Partially_agree	Disagree	Unsure	Partially_disagree	NoAnswer	No	I_don't_know	Yes	I_don't_know	No
351	Very_confident	A_combination	Agree	Agree	Partially_agree	Partially_agree	Partially_agree	High	High	High	Moderate	High	Moderate	High	Very_high	High	High	Moderate	Moderate	High	No	No	No	Yes	No	No	No	Mostly_negative	Strongly_agree	Agree	Agree	Disagree	Disagree	Mostly_negative	Partially_disagree	Agree	Agree	Disagree	Disagree	Agree	Agree	Agree	Agree	Disagree	No	Yes	Yes	No	Yes
352	Very_confident	NoAnswer	NoAnswer	NoAnswer	NoAnswer	NoAnswer	NoAnswer	NoAnswer	NoAnswer	NoAnswer	NoAnswer	NoAnswer	NoAnswer	NoAnswer	NoAnswer	NoAnswer	NoAnswer	NoAnswer	NoAnswer	NoAnswer	No	No	No	Yes	No	Yes	No	Positive	NoAnswer	NoAnswer	NoAnswer	NoAnswer	NoAnswer	NoAnswer	NoAnswer	NoAnswer	NoAnswer	Unsure	Strongly_agree	Strongly_agree	Strongly_agree	Agree	Partially_agree	Strongly_disagree	No	No	No	No	Yes
353	Not_too_confident	A_combination	Agree	Partially_agree	Disagree	Partially_disagree	Unsure	High	Moderate	High	Moderate	Moderate	Moderate	High	Moderate	Moderate	High	High	NoAnswer	NoAnswer	No	No	No	No	No	No	No	No_impact	Agree	Partially_agree	Unsure	Partially_agree	Disagree	No_impact	Partially_agree	Partially_agree	Unsure	Unsure	Unsure	Partially_agree	Unsure	Unsure	Unsure	Unsure	NoAnswer	Yes	Yes	Yes	Yes
354	Very_confident	Human_activity	Strongly_agree	Strongly_disagree	Strongly_agree	Strongly_agree	Strongly_disagree	Very_high	High	High	High	Very_high	High	High	High	Very_high	Very_high	High	High	High	No	No	No	Yes	No	No	No	Mostly_negative	Strongly_agree	Strongly_agree	Agree	Strongly_disagree	Partially_agree	Mostly_negative	Agree	Agree	Strongly_agree	Disagree	Disagree	Agree	Partially_agree	Unsure	Agree	Strongly_disagree	No	No	No	Yes	I_don't_know
[truncated: 45 more columns]
