# Supplementary material for: Perceptions of U.S. and Canadian maple syrup producers toward climate change, its impacts, and potential adaptation measures
Source: PLOS journal article supplement (doi:10.1371/journal.pone.0215511), 2019-04-25
Supplement: S3 (10.1371/journal.pone.0215511.s003) [file journal.pone.0215511.s003]

### **Supplementary Material S3**

#### **Conditional Inference (CI) classification trees.**

Selected conditional inference classification tree predicting the response rates of survey questions using only predictors identified as important during the random forest variable importance evaluation step of the analyses (see Table 1). For each tree, only significant predictors at  $p < 0.05$  were retained by the algorithm. Sample size used to build each tree can be calculated by adding sample sizes indicated at each terminal node. The classification accuracy was calculated for each tree using a subset of 20% the dataset.

Indicate your degree of agreement for the following statement:

**Climate change impacts are happening slowly  
enough to let us adapt as it comes**

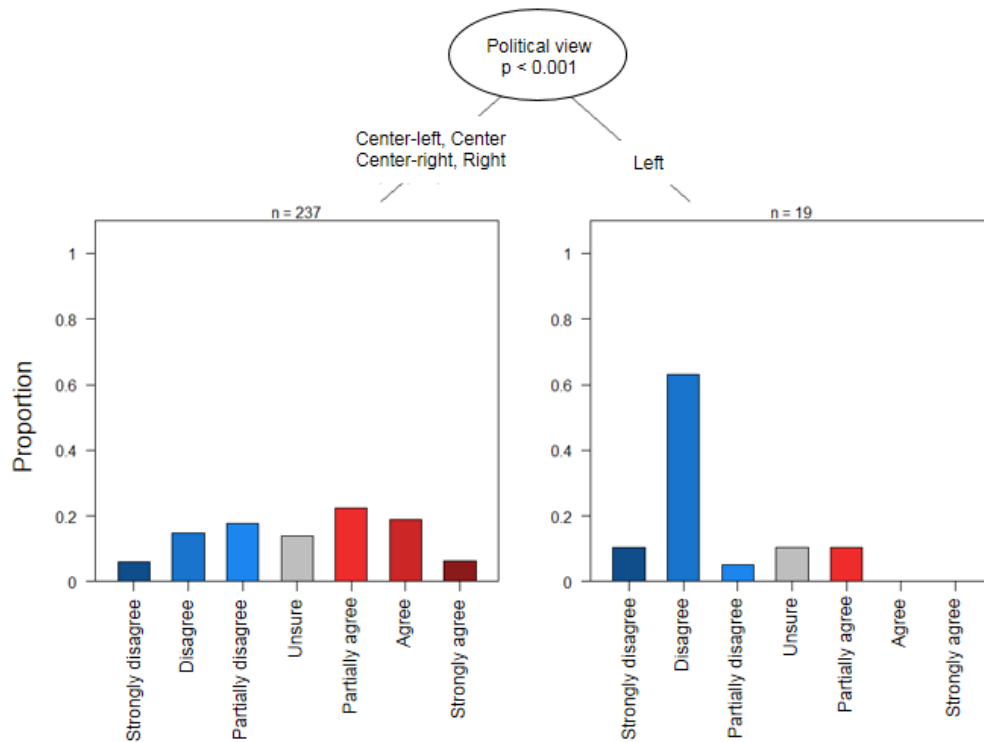

**Fig. A.** CA = 21.4%.

Indicate your degree of agreement for the following statement:

**Climate change is now noticeable in my region**

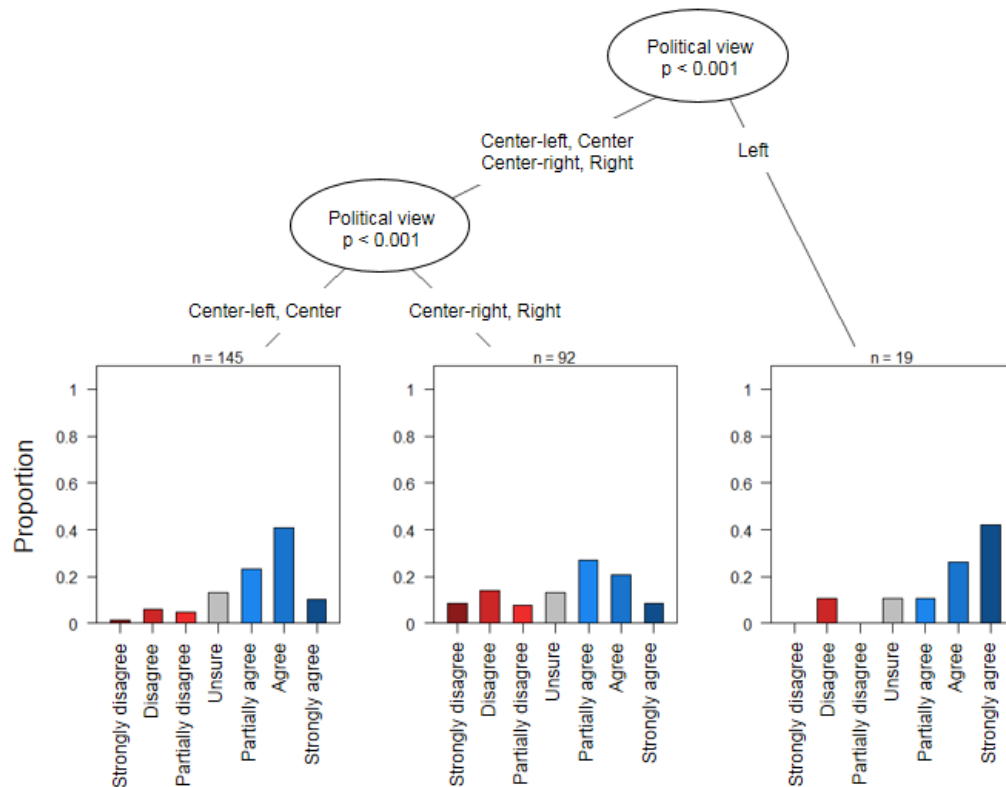

**Fig. B.** CA = 30.0%.

Indicate your degree of agreement for the following statement:

**The impact of climate change on me  
and my community is tangible**

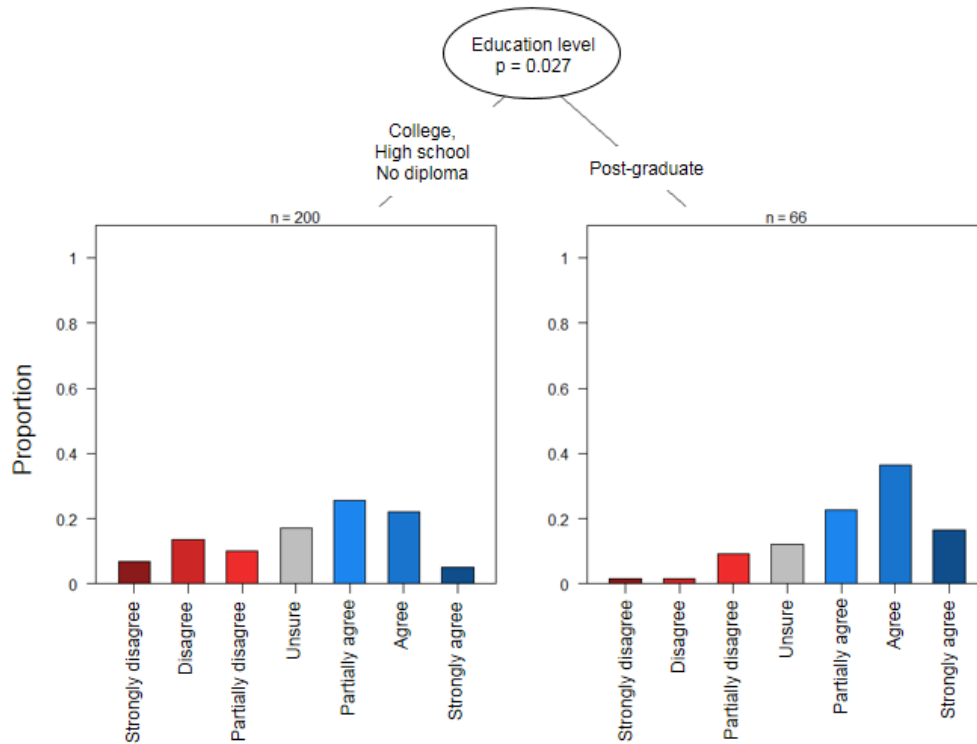

**Fig. C.** CA = 25.7%.

Indicate your degree of agreement for the following statement:

**The projected impacts of climate change are exaggerated**

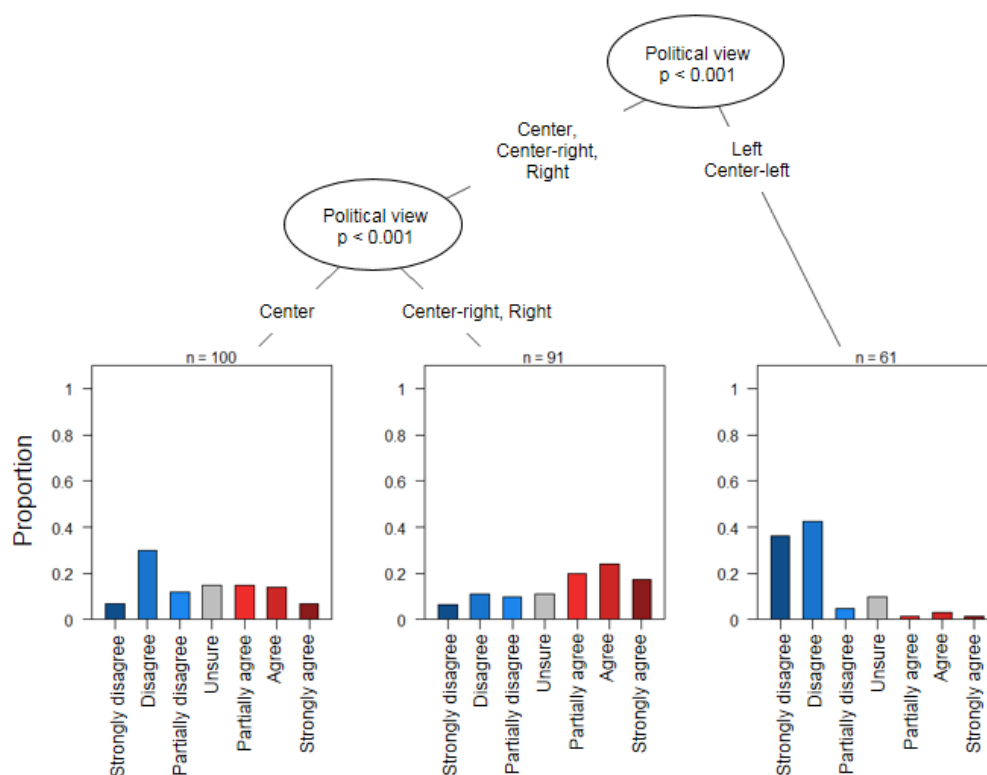

**Fig. D.** CA = 22.9%.

What do you think is the probability that the following climatic events will happen more frequently in the next 30 years?

### Summer heat waves

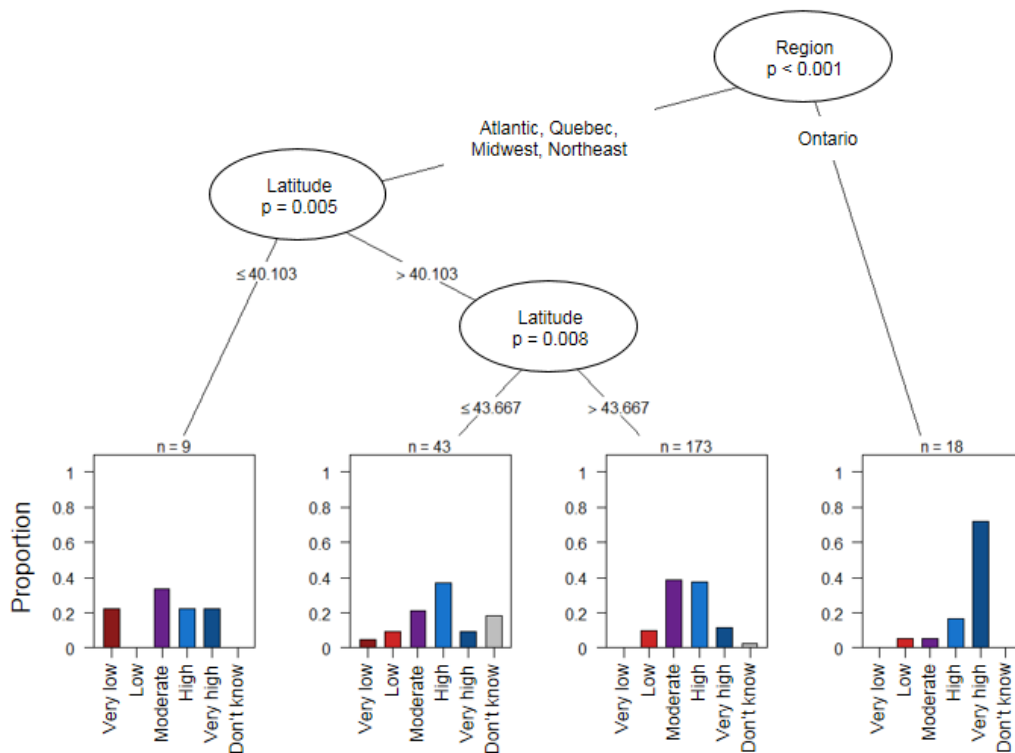

**Fig. E.** CA = 35.7%.

What do you think is the probability that the following climatic events will happen more frequently in the next 30 years?

### High number of winter thaw events

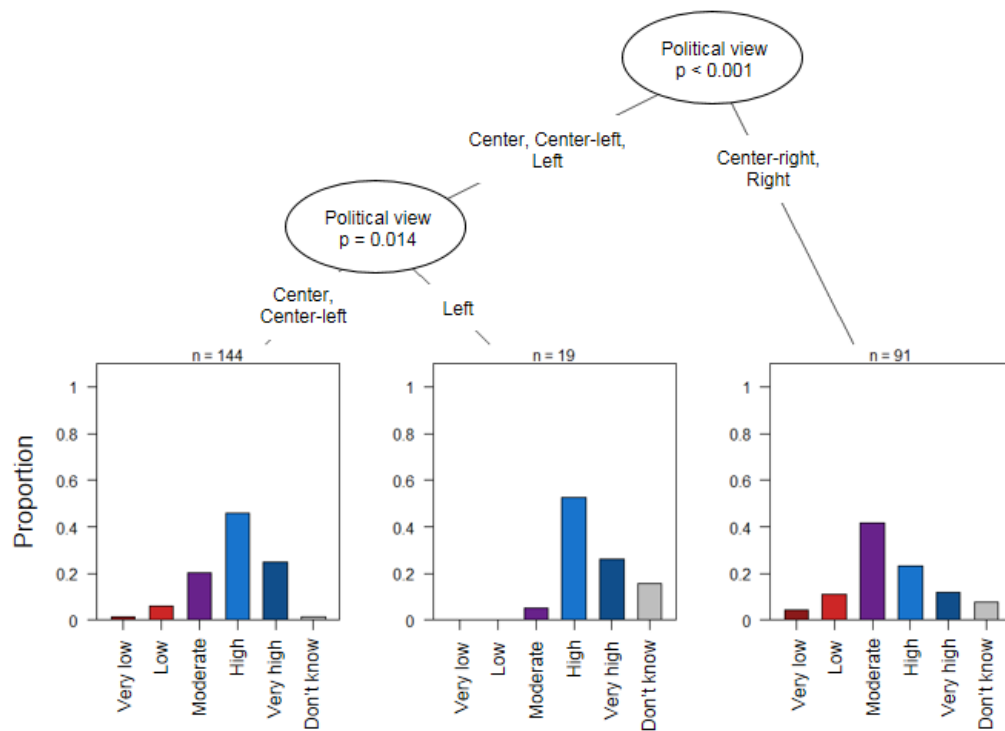

**Fig. F.** CA = 40.0%.

What do you think is the probability that the following climatic events will happen more frequently in the next 30 years?

### Warm winters

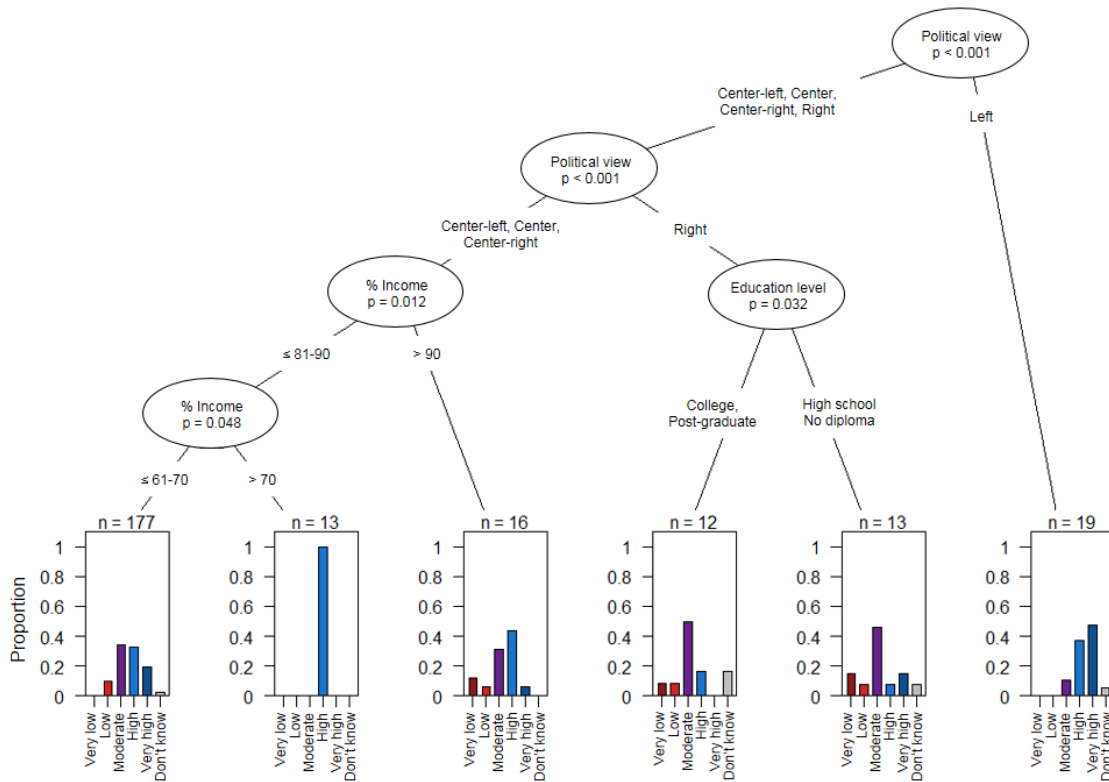

**Fig. G.** CA = 32.9%.



What do you think is the probability that the following climatic events will happen more frequently in the next 30 years?

### Snow and ice storms

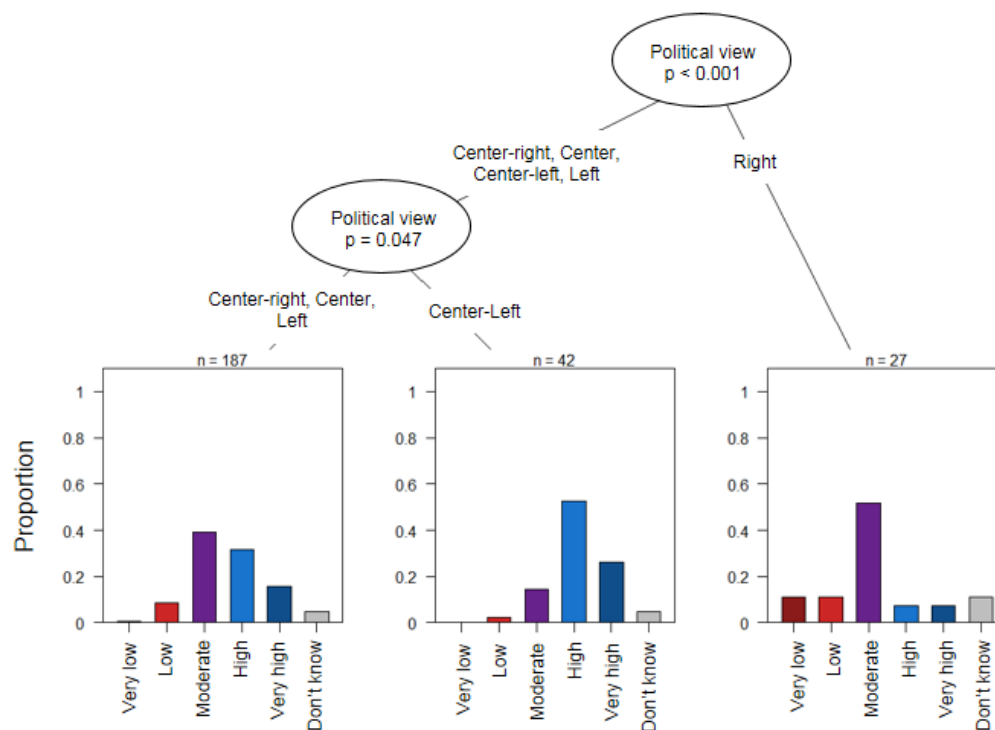

**Fig. H.** CA = 42.9%.

What do you think is the probability that the following climatic events will happen more frequently in the next 30 years?

**Shifts in timing of the spring period  
in which freeze-thaw events happen**

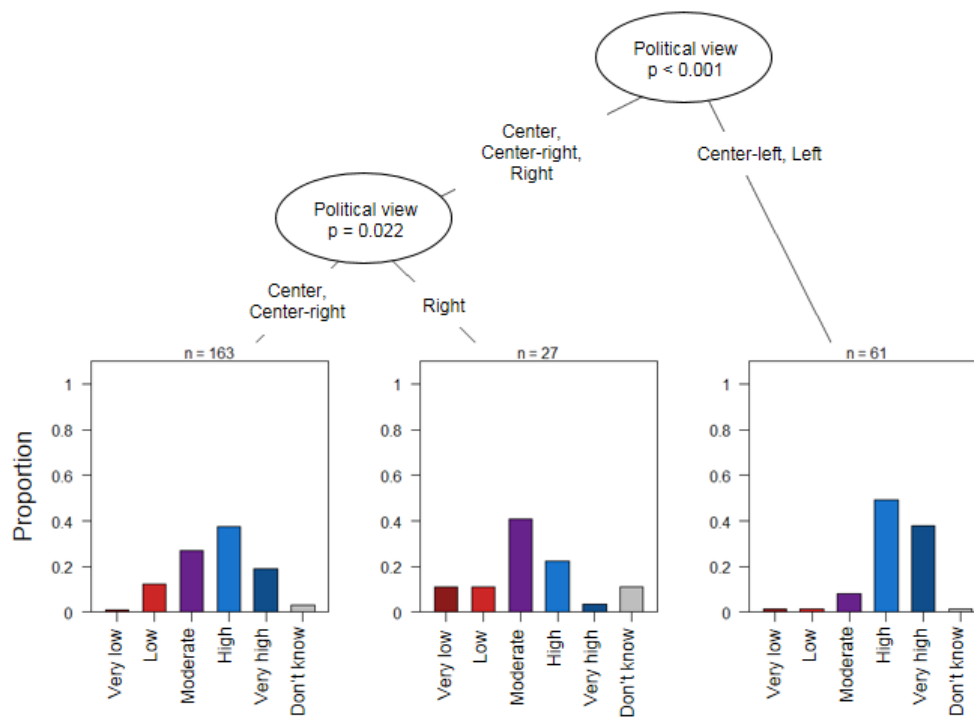

**Fig. I.** CA = 35.7%.

What do you think is the probability that the following climatic events will happen more frequently in the next 30 years?

### Insect outbreaks

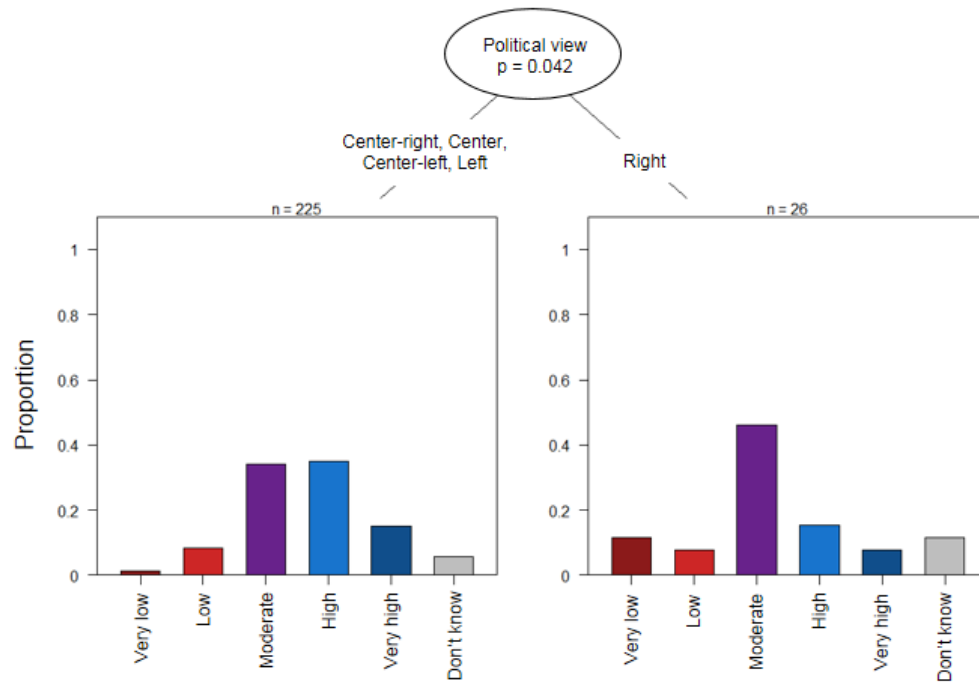

**Fig. J.** CA = 25.7%.

What do you think is the probability that the following climatic events will happen more frequently in the next 30 years?

### High annual mean temperatures

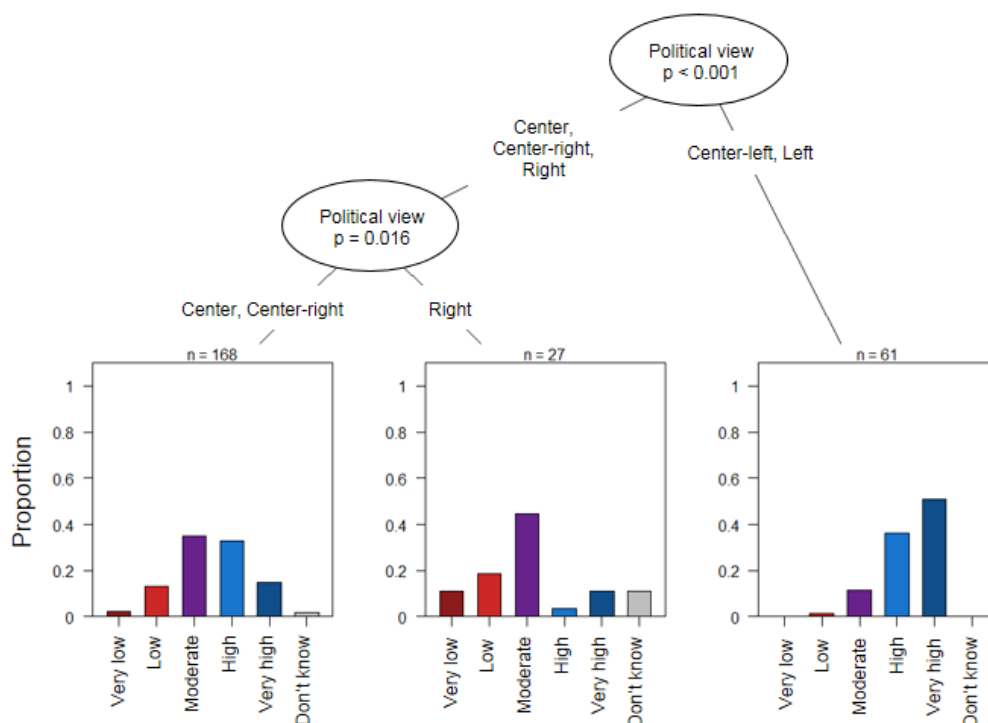

**Fig. K.** CA = 34.3%.

What do you think is the probability that the following climatic events will happen more frequently in the next 30 years?

### Heavy rainfall episodes

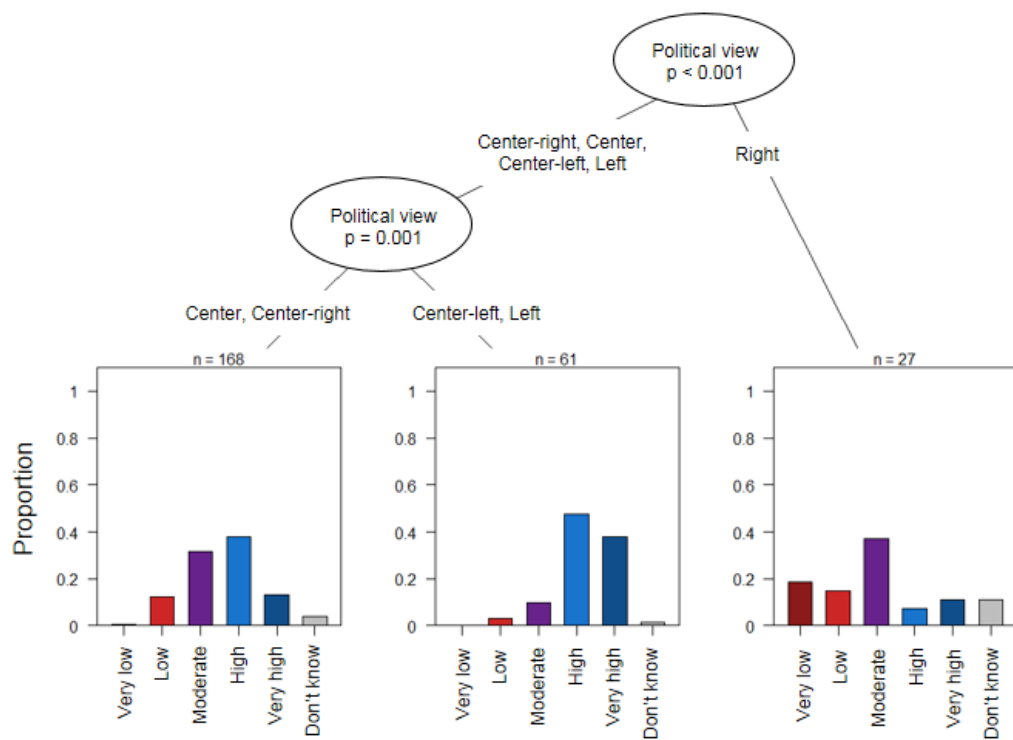

Fig. L. CA = 37.1%.

What do you think is the probability that the following climatic events will happen more frequently in the next 30 years?

### Severe windstorms

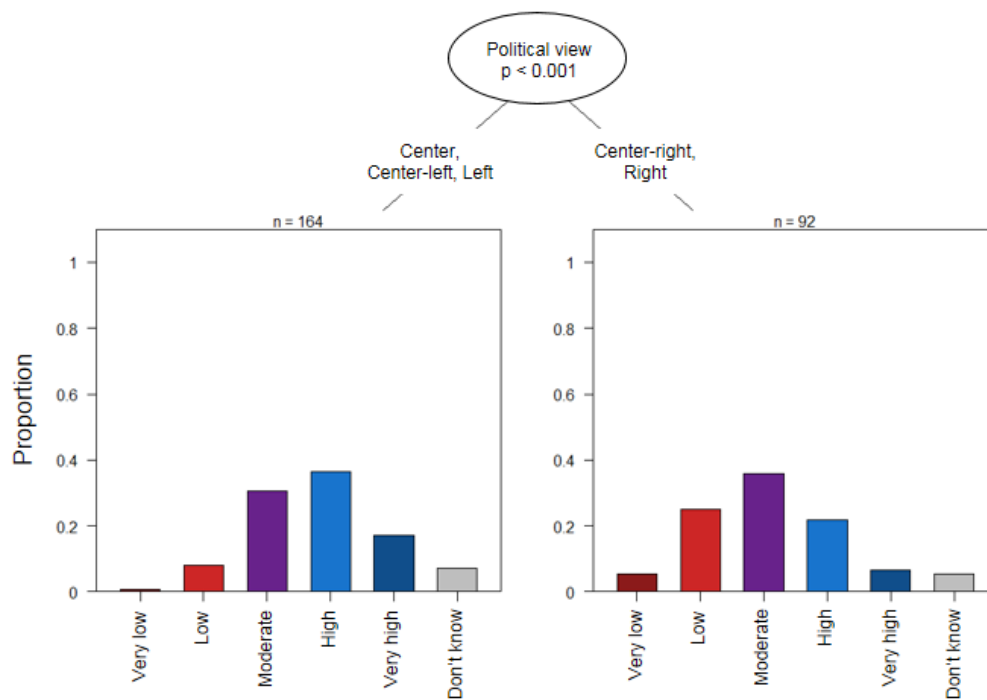

**Fig. M.** CA = 28.6%.

What do you think is the probability that the following climatic events will happen more frequently in the next 30 years?

**Extreme high temperature periods during the spring season  
that prematurely stop or slow sap flow**

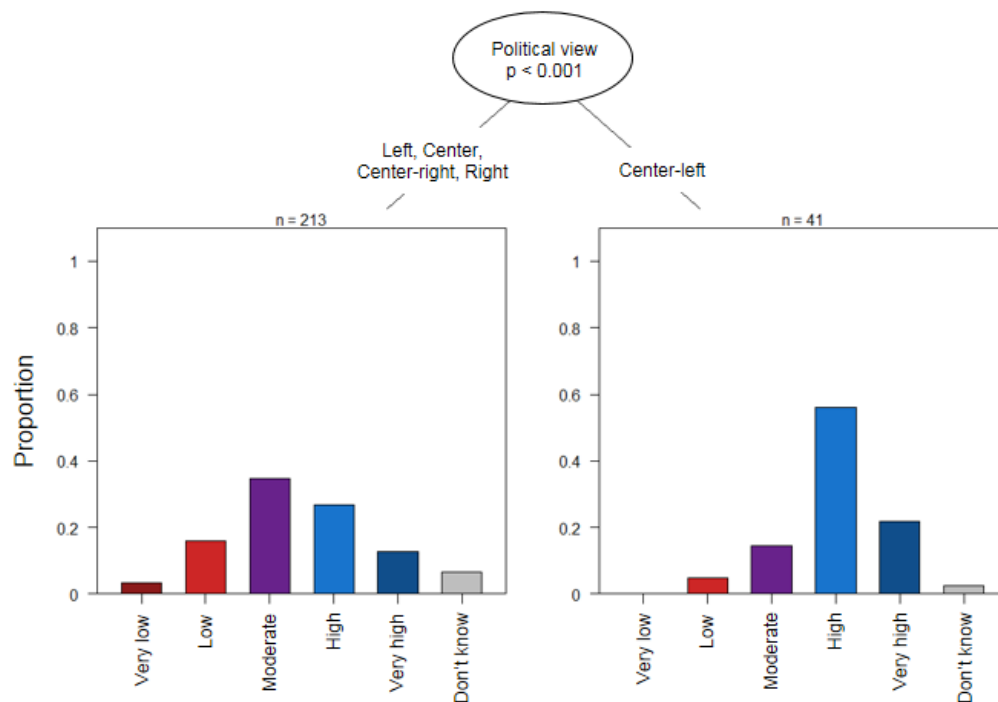

**Fig. N.** CA = 35.7%.

What do you think is the probability that the following climatic events will happen more frequently in the next 30 years?

## Droughts

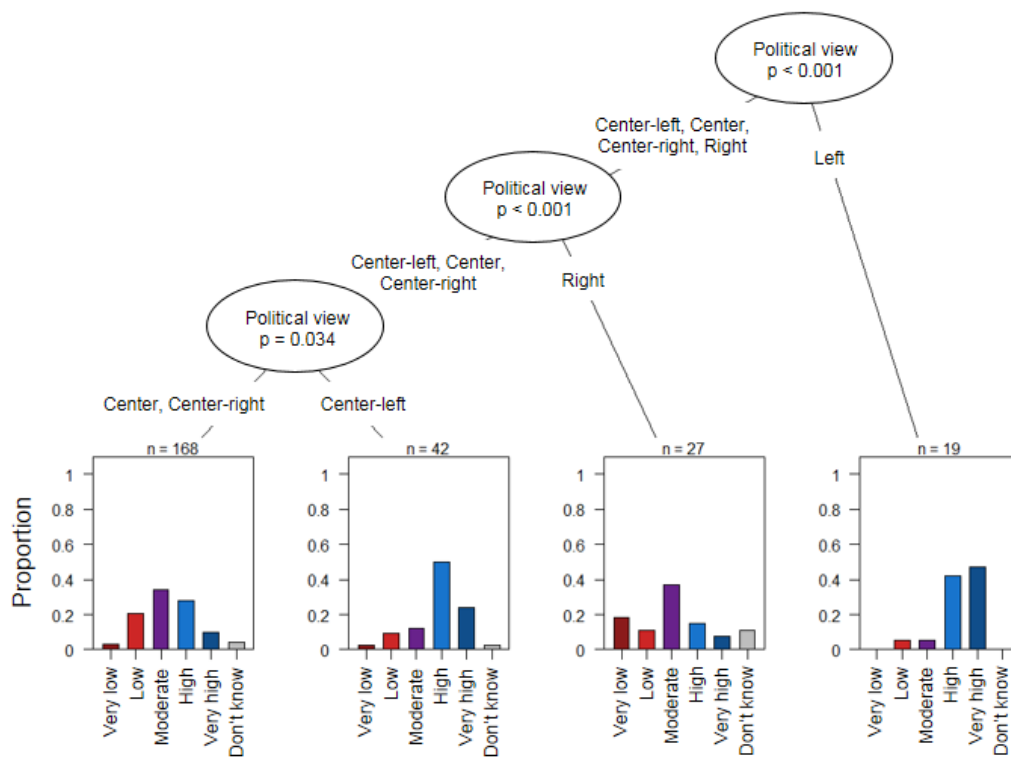

**Fig. O.** CA = 31.4%.



What do you think is the probability that the following climatic events will happen more frequently in the next 30 years?

## Hail storms

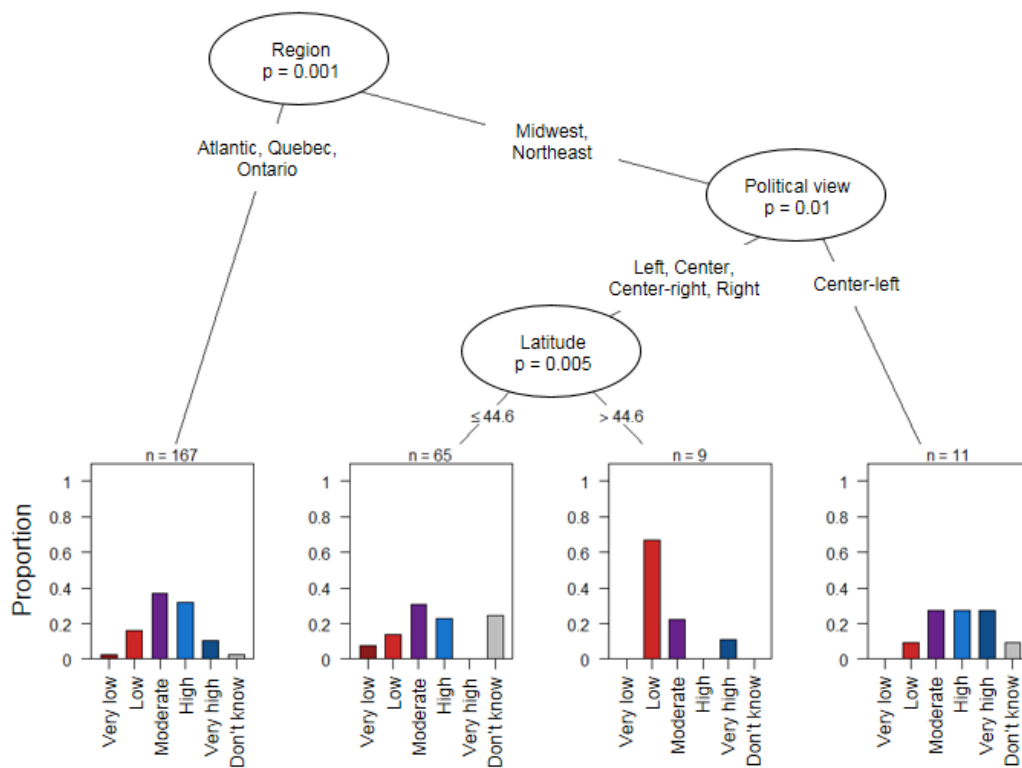

**Fig. P.** CA = 37.1%.

In the last decades, which of these climate hazards have caused significant damage to your sugar bush?

### Ice storm

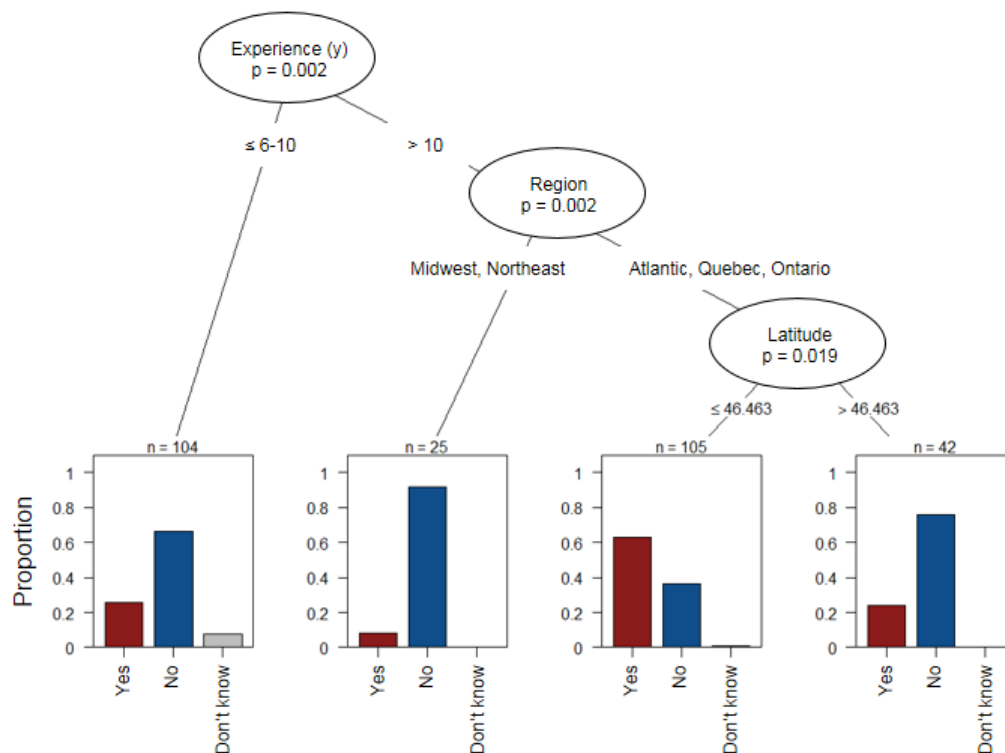

**Fig. Q.** CA = 51.4%.

In the last decades, which of these climate hazards have caused significant damage to your sugar bush?

### Insect outbreak

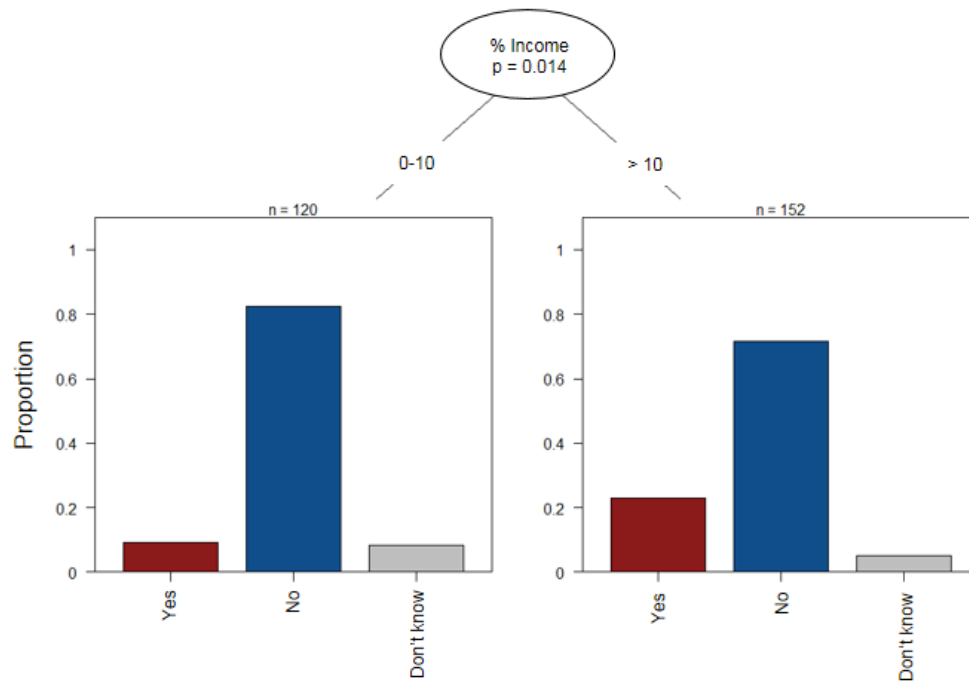

**Fig. R.** CA = 80.0%.

Indicate your degree of agreement for the following statements:

## Maple syrup production is closely linked to climate change

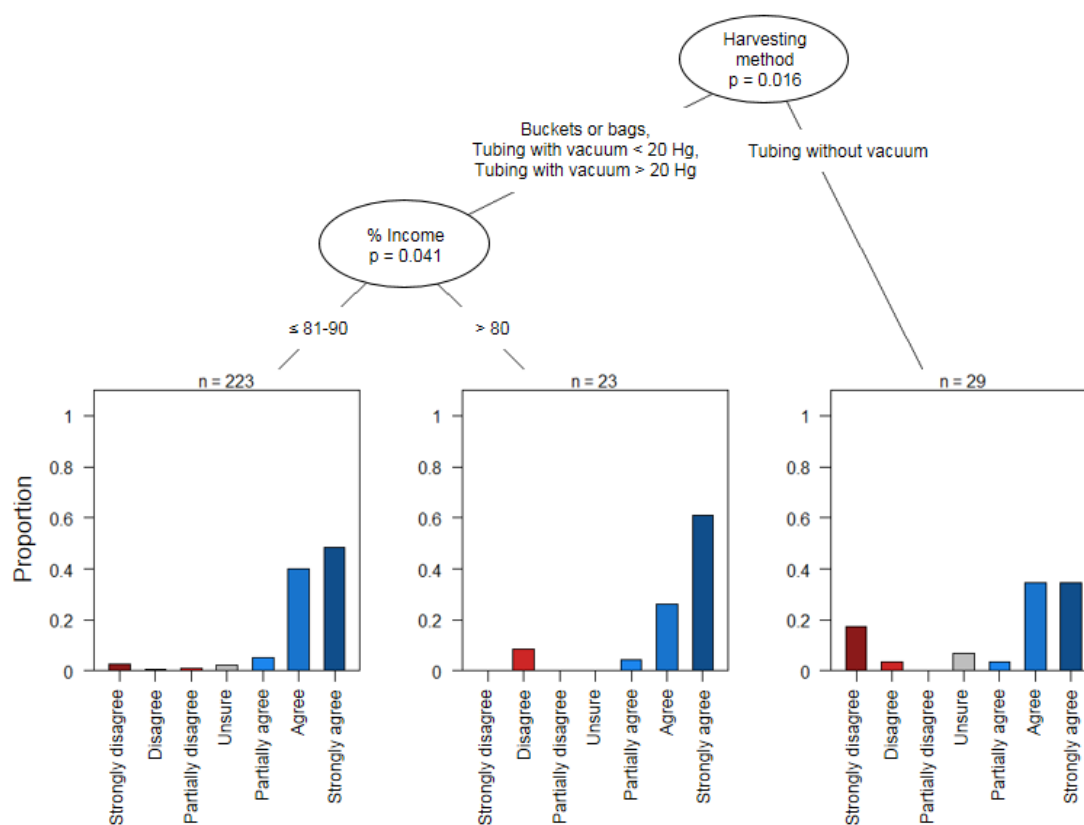

**Fig. S.** CA = 42.9%.

Indicate your degree of agreement for the following statements:

**Climate change has led to variability in the beginning  
of the tap season between years**

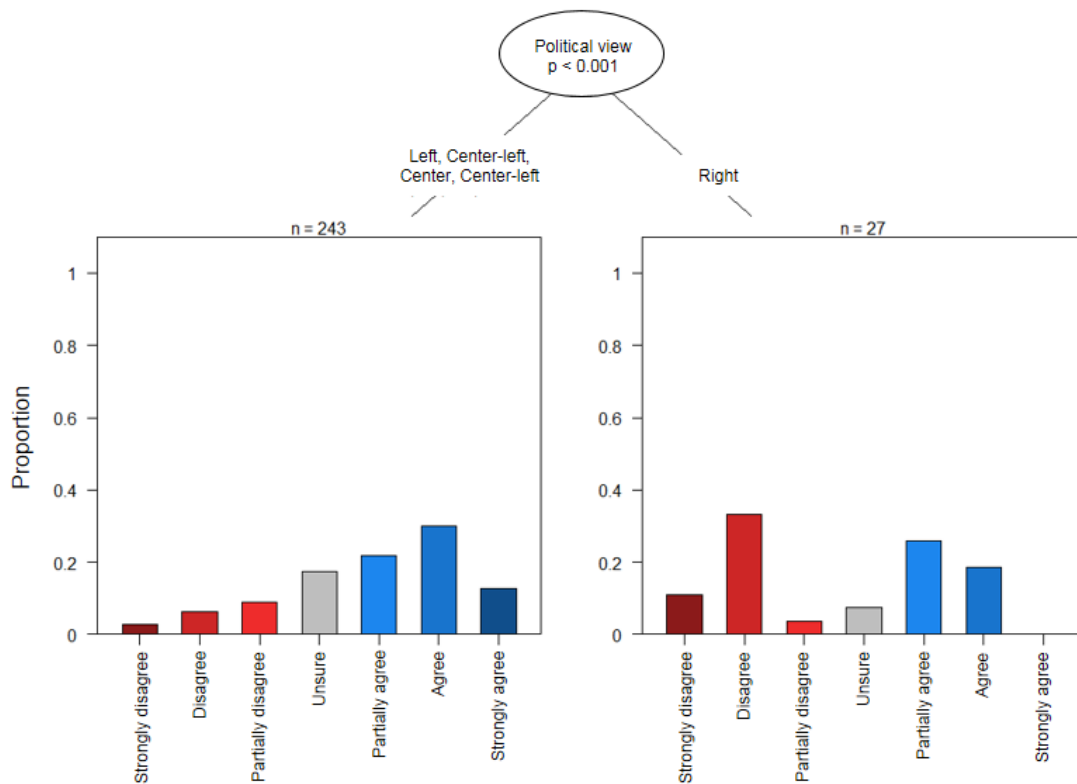

**Fig. T.** CA = 31.4%.

Indicate your degree of agreement for the following statements:

**It's now easy to determine the best moment to tap maples**

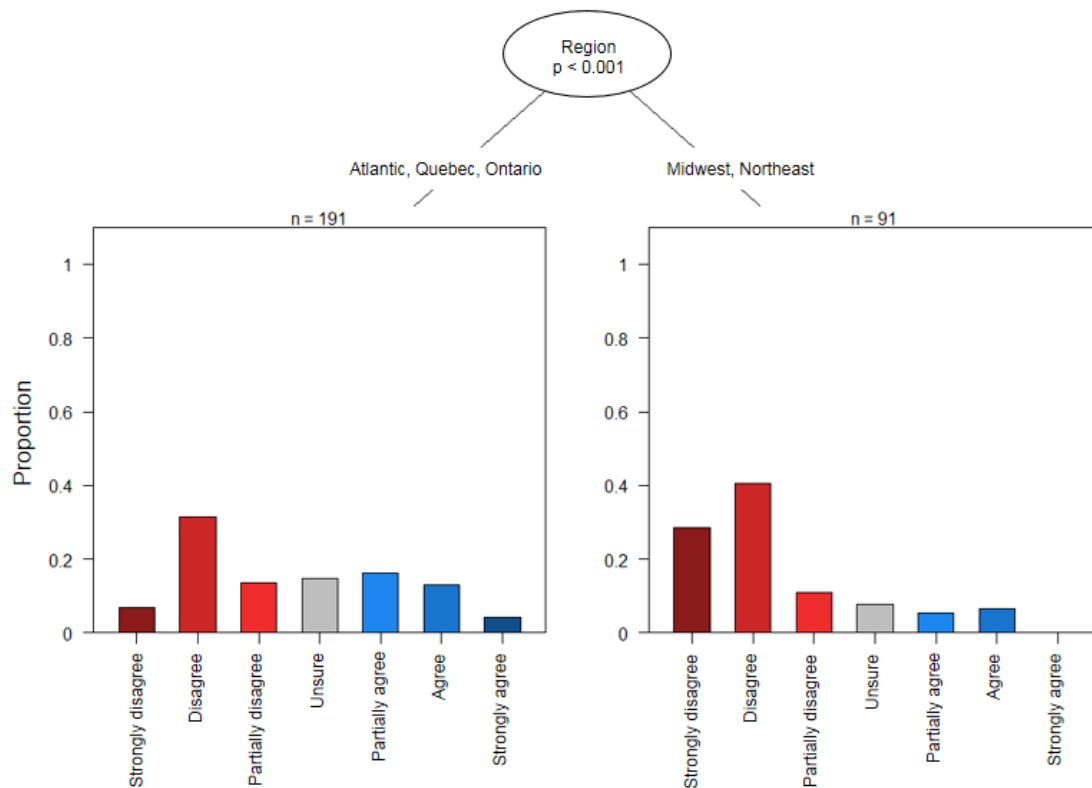

**Fig. U.** CA = 24.3%.

Indicate your degree of agreement for the following statements:

**In my sugar bush, I have observed an increase in maple dieback because of climate change**

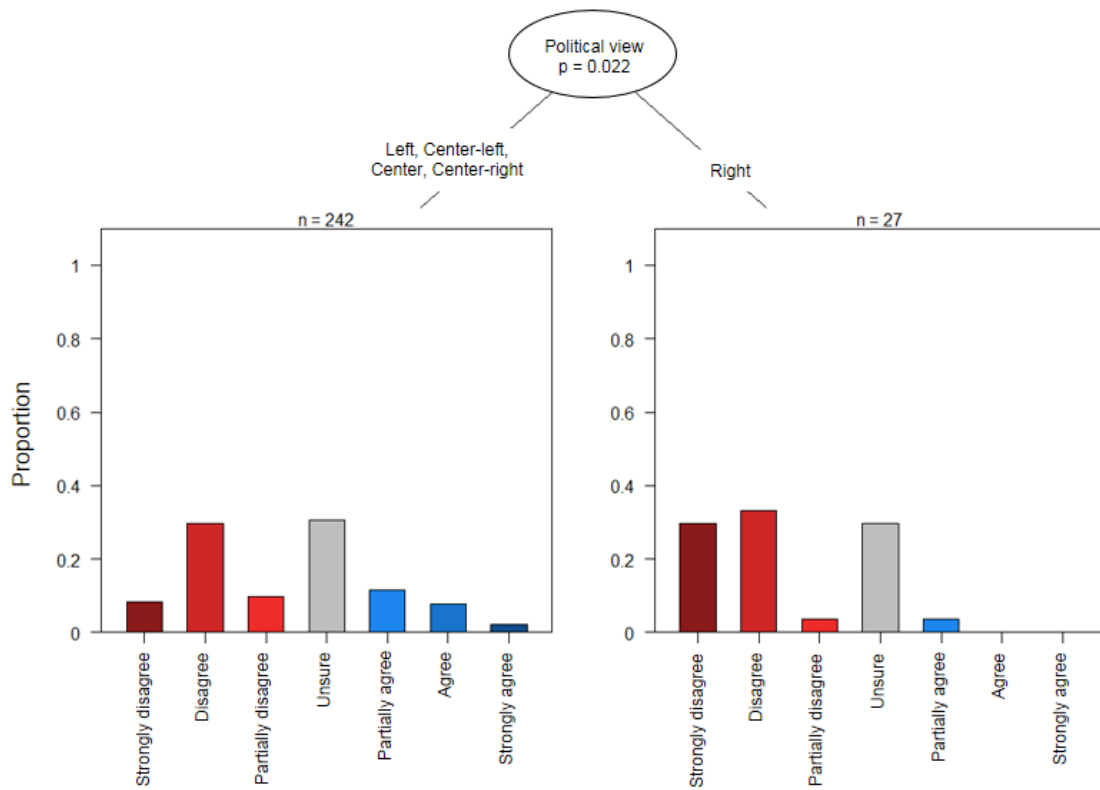

**Fig. V.** CA = 27.1%.

Indicate your degree of agreement for the following statements:

**In the next 30 years, the beginning of the sap collection season is going to happen earlier because of climate change**

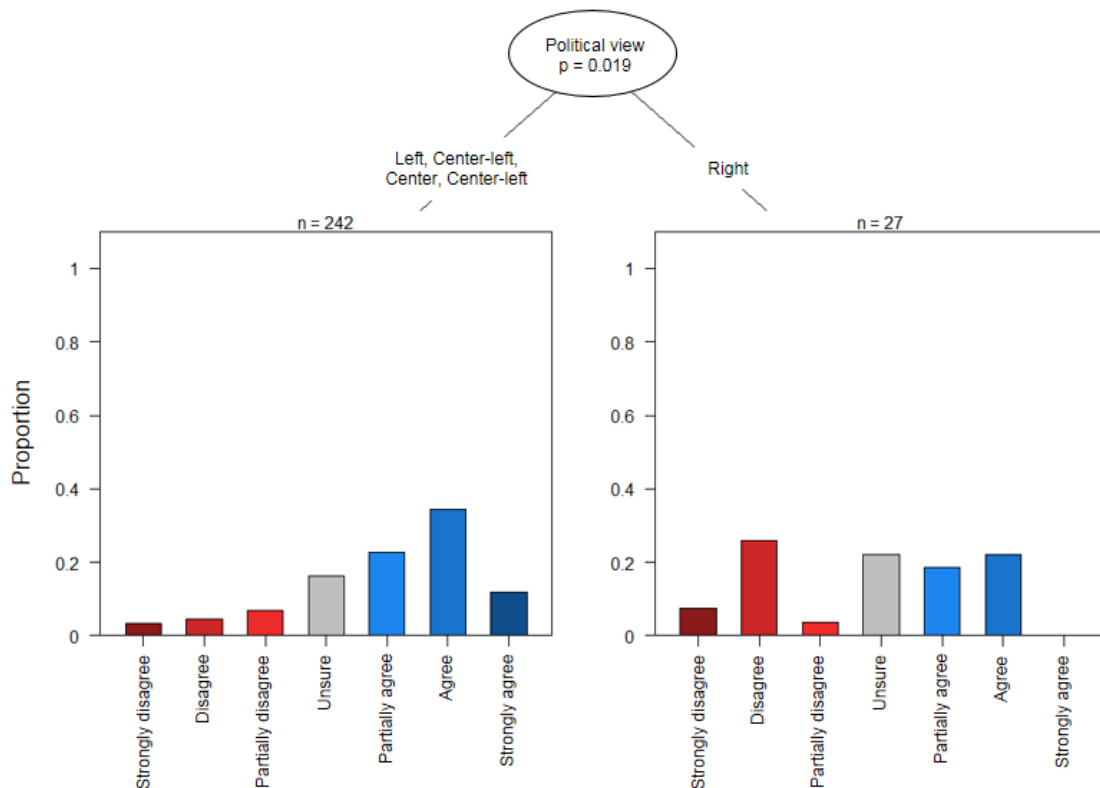

**Fig. W.** CA = 28.6%.



Indicate your degree of agreement for the following statements:

**In the next 30 years, climate change will lead to variability in the beginning of the sap collection season between years**

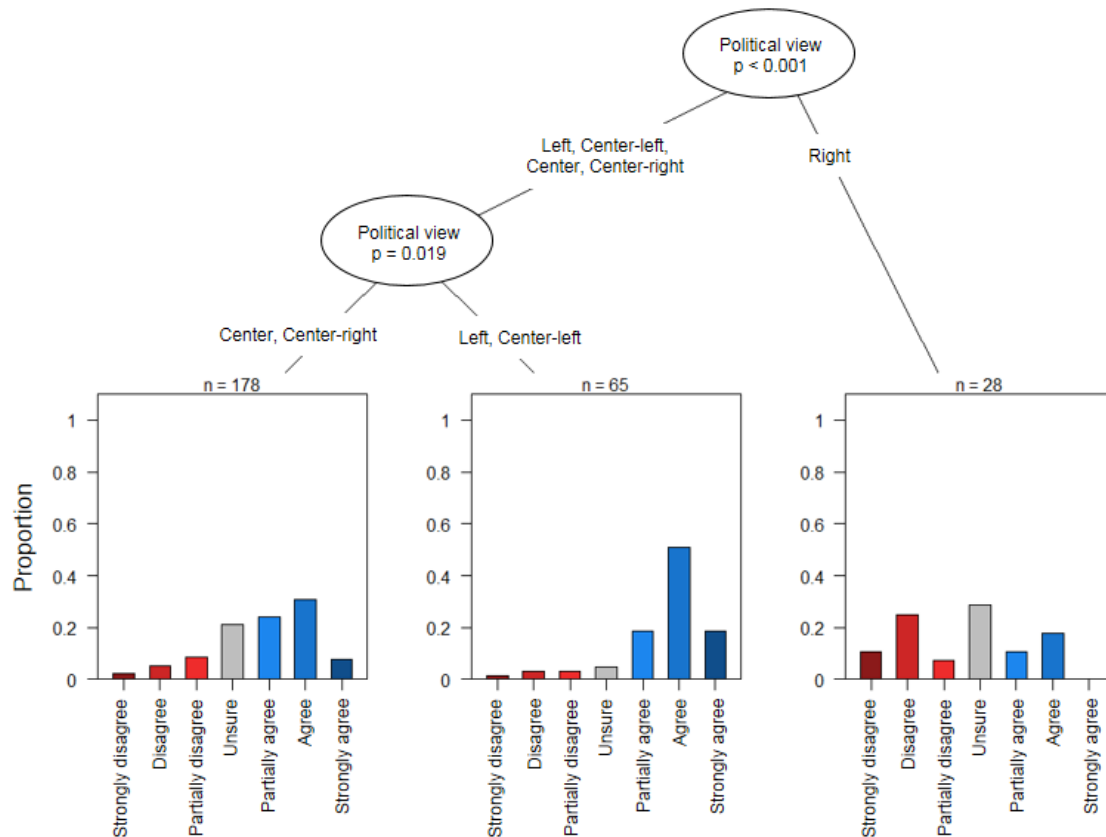

**Fig. X.** CA = 30.0%.

Indicate your degree of agreement for the following statements:

**Possible adaptations to climate change are numerous  
for the maple syrup industry**

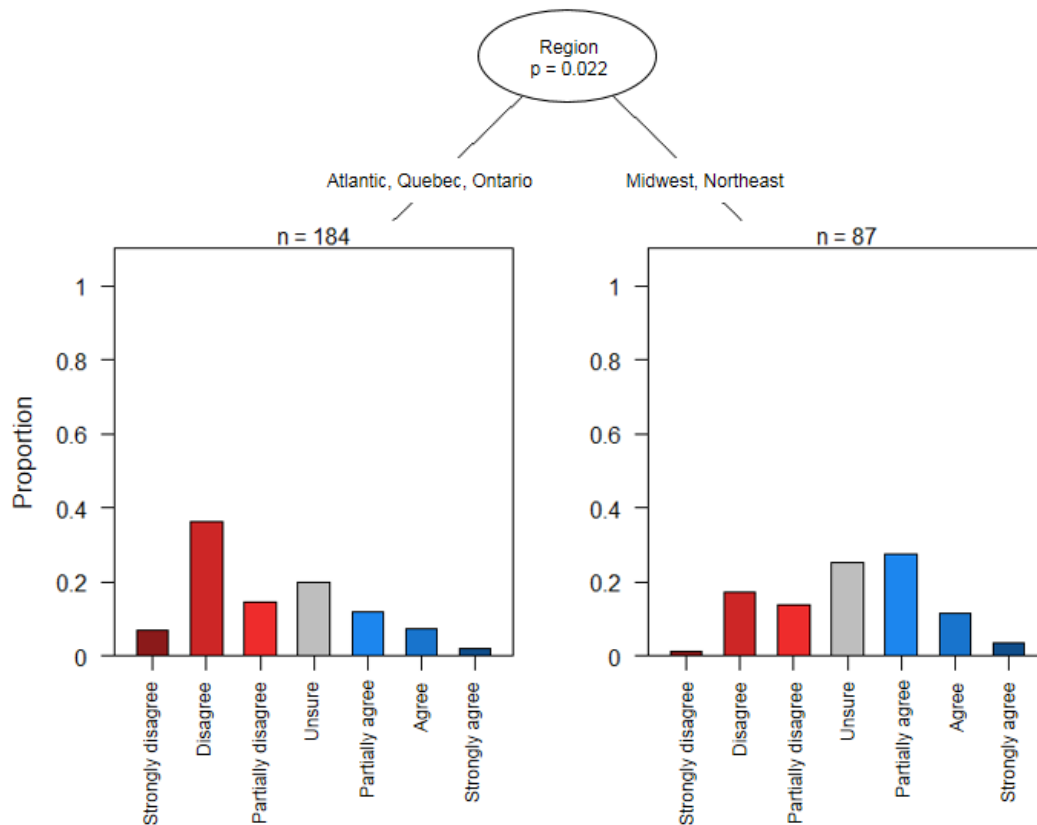

**Fig. Y.** CA = 30.0%.

Indicate your degree of agreement for the following statements:

**have a wide knowledge of the newest tapping technologies (e.g., high-vacuum tubing, new spouts, liming and fertilizing, reverse osmosis, silvicultural management, tube cleaning/spout replacement)**

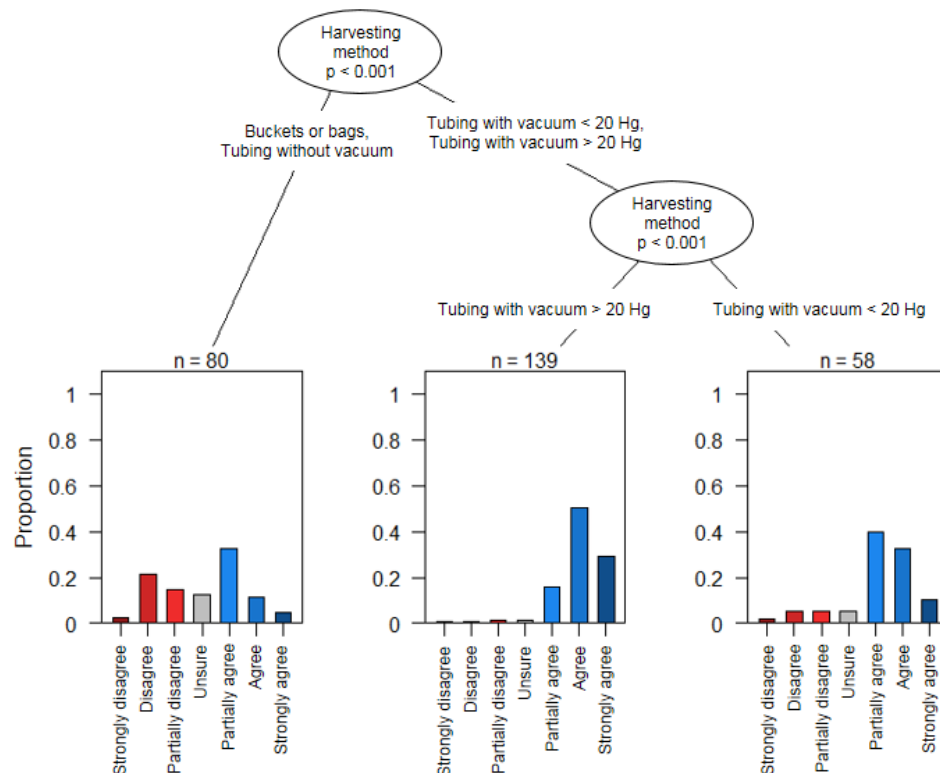

**Fig. Z.** CA = 37.1%.

Indicate your degree of agreement for the following statements:

**New maple syrup technologies will help me face the new challenges coming from climate change**

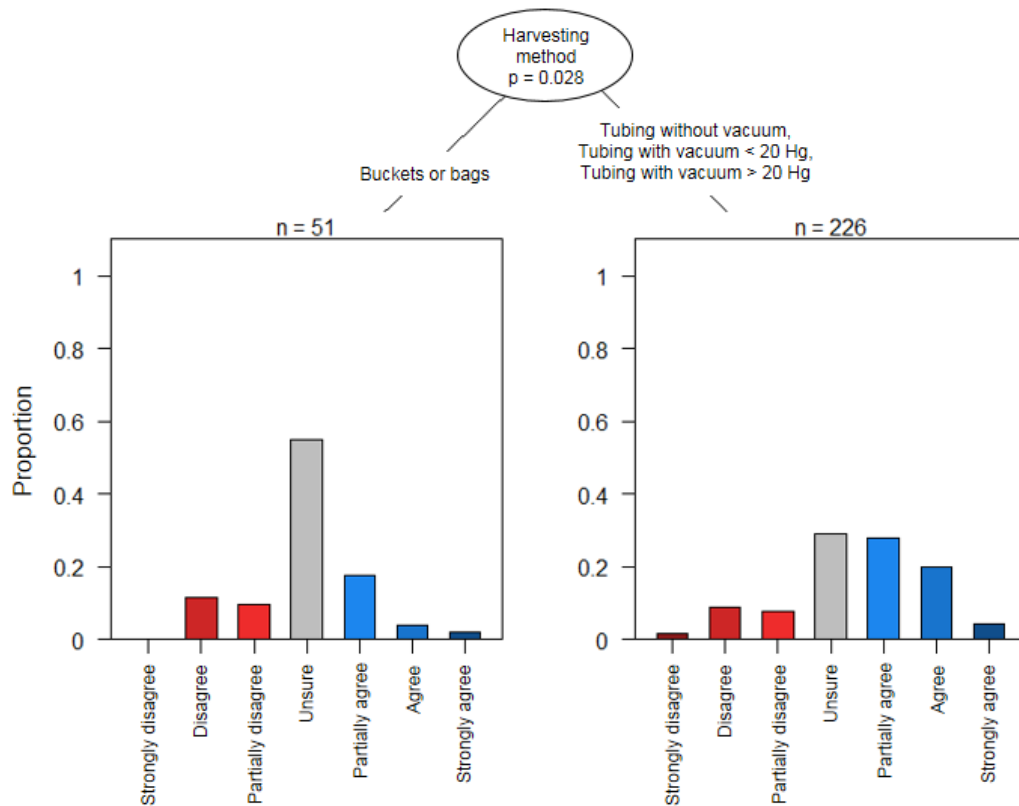

**Fig. AA.** CA = 21.4%.

Indicate your degree of agreement for the following statements:

**It is highly probable that I will adopt climate adaptation strategies if I think it could increase my maple syrup production**

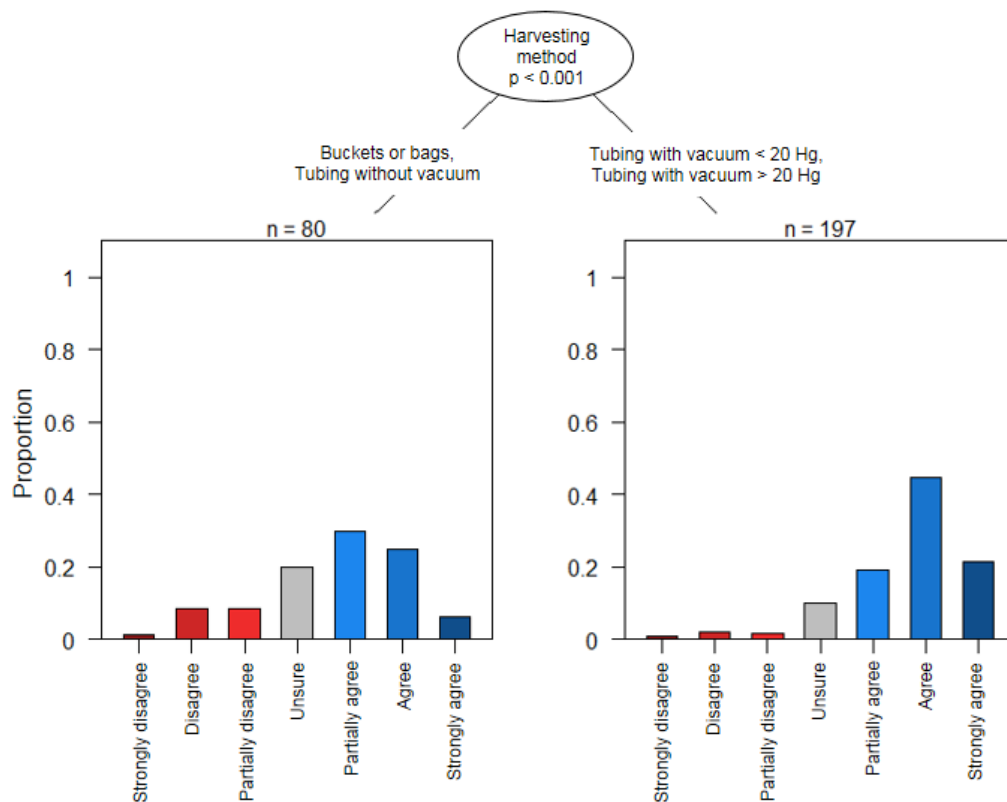

**Fig. AB.** CA = 34.3%.

Indicate your degree of agreement for the following statements:

**Before making any changes to adapt to climate change, I will wait to see what effects it has on my maple syrup production**

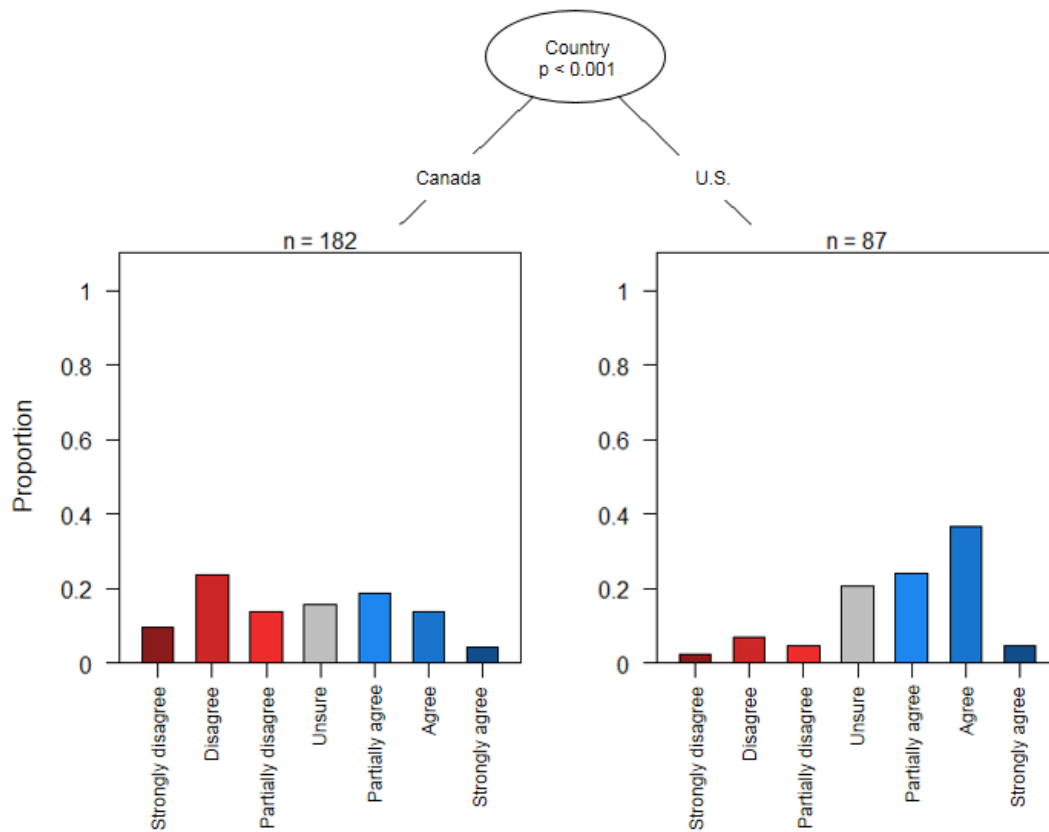

**Fig. AC.** CA = 21.4%.

Which of these adaptation measures would allow producers in general to effectively adapt to climate change?

**Doing silvicultural management in your sugar bush, for example, maintain the density of trees at a good level or to favor biodiversity**

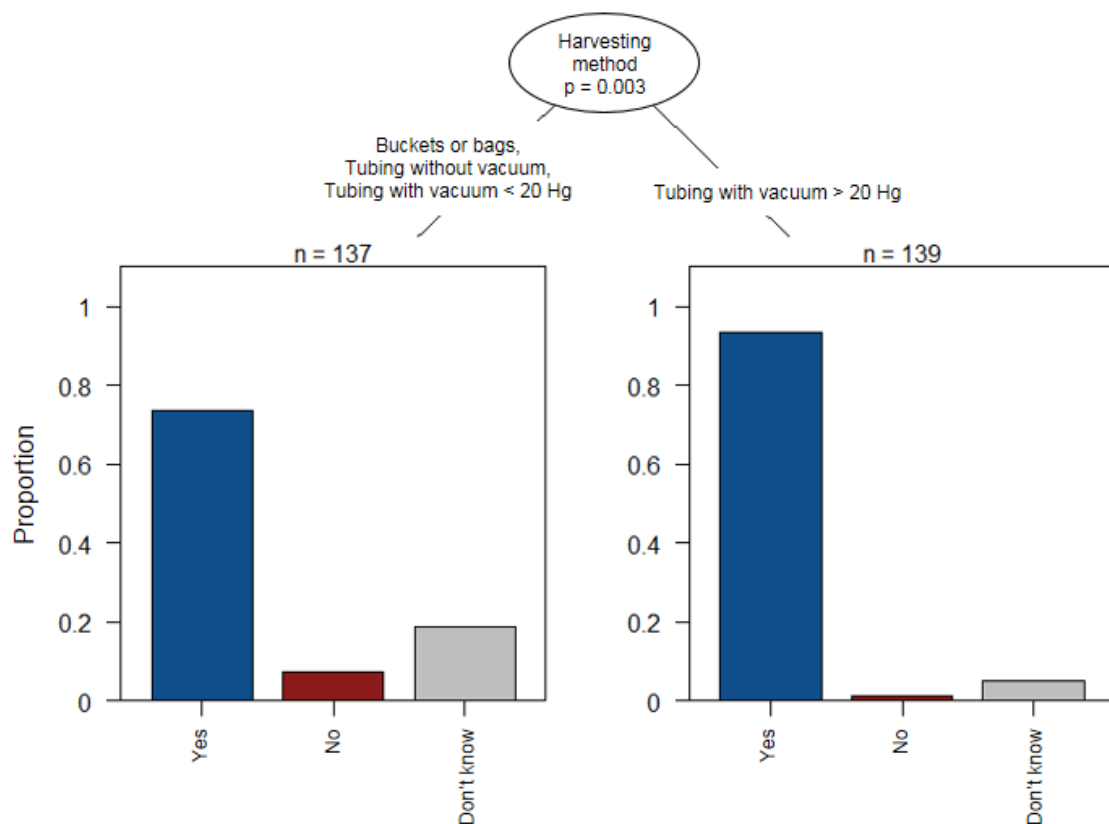

**Fig. AD.** CA = 85.7%.

Which of these adaptation measures would allow producers in general to effectively adapt to climate change?

**Adopting strong sanitation practices (tubing and spout cleaning and/or annual spout replacement)**

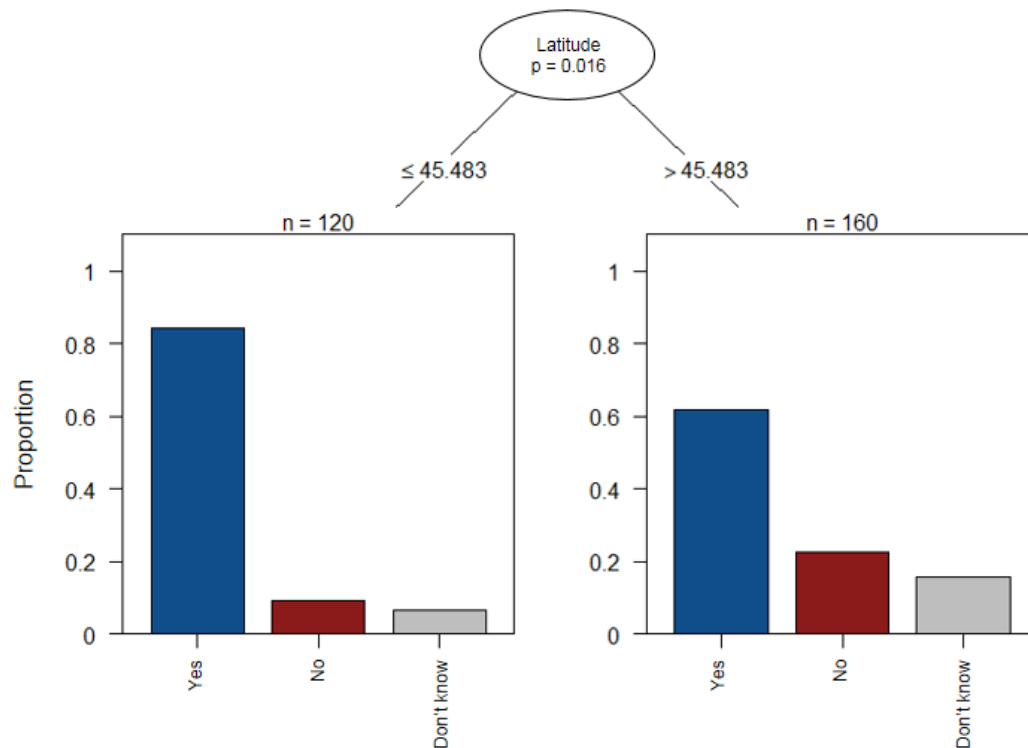

**Fig. AE.** CA = 62.9%.



Which of these adaptation measures would allow producers in general to effectively adapt to climate change?

### Tapping earlier in the year

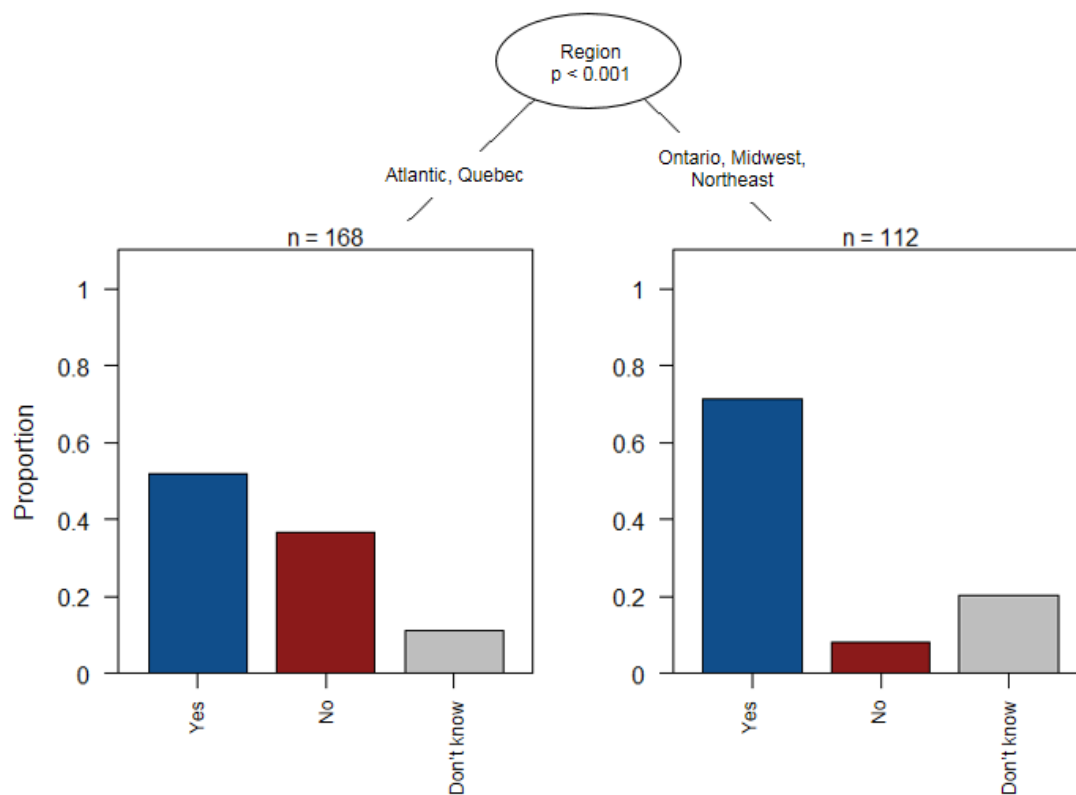

**Fig. AF.** CA = 57.1%.

Which of these adaptation measures would allow producers in general to effectively adapt to climate change?

**Installing a high-vacuum tubing system for sap collection**

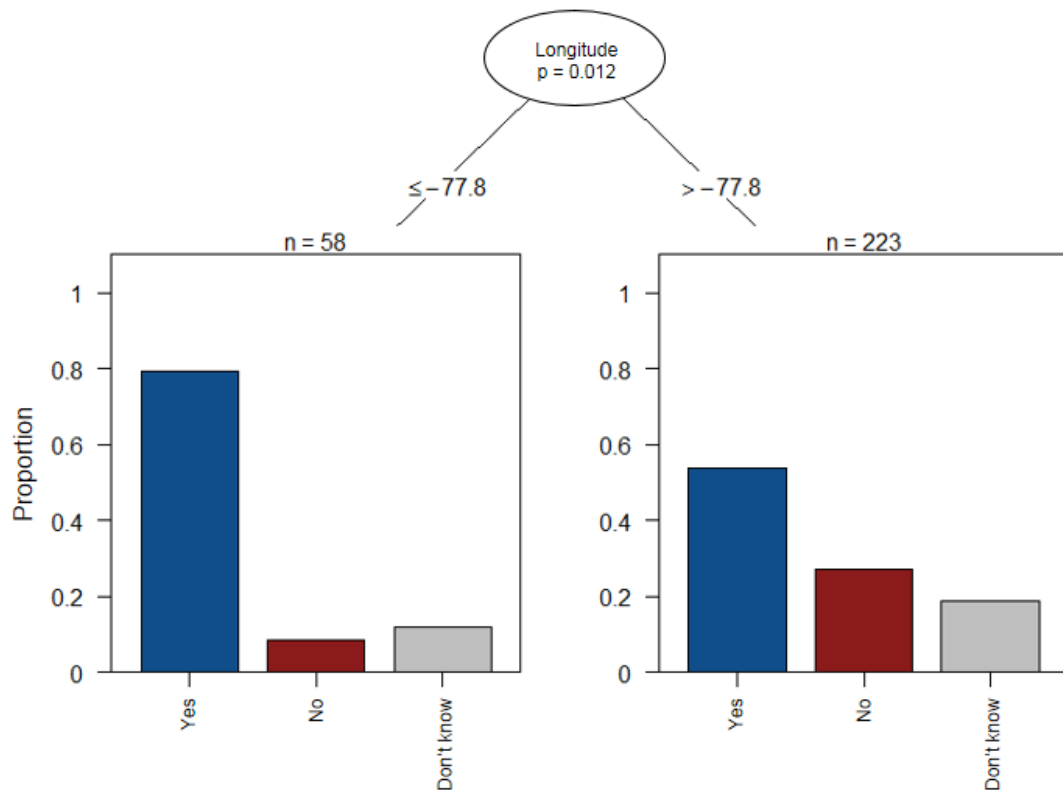

**Fig. AG.** CA = 58.6%.

Which of these adaptation measures would allow producers in general to effectively adapt to climate change?

### Liming and fertilizing to limit maple dieback

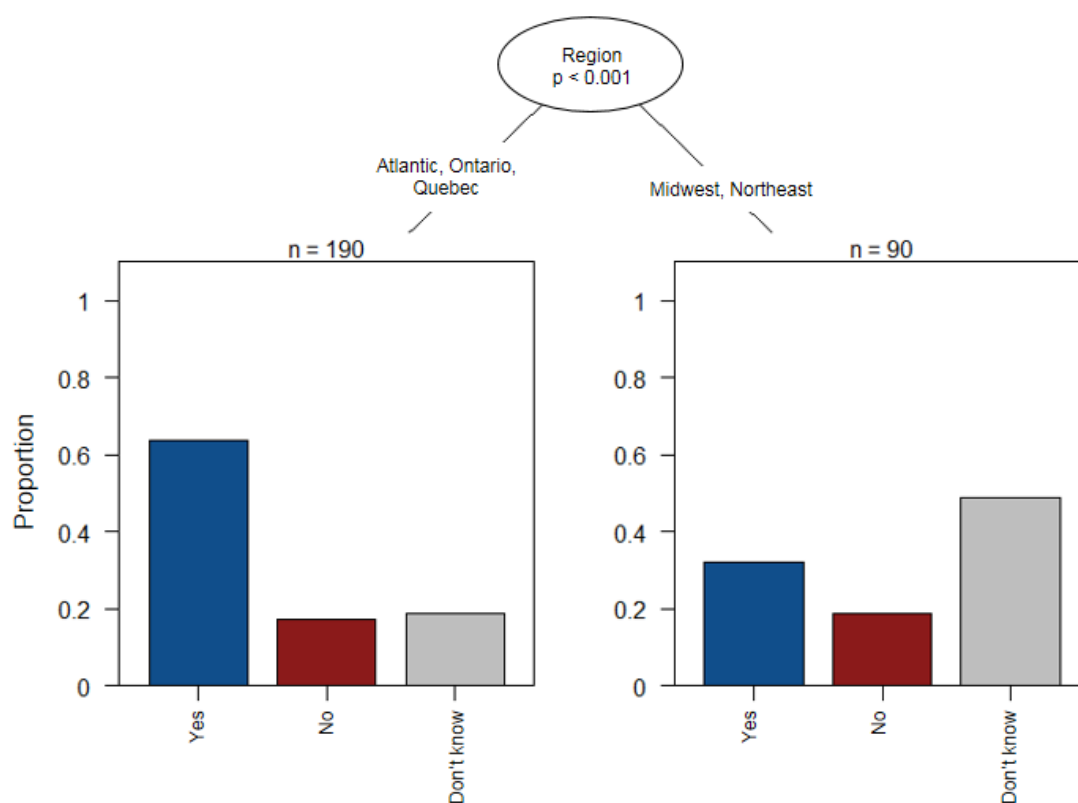

**Fig. AH.** CA = 57.1%.

Which of these adaptation measures would allow producers in general to effectively adapt to climate change?

### Tapping red maples

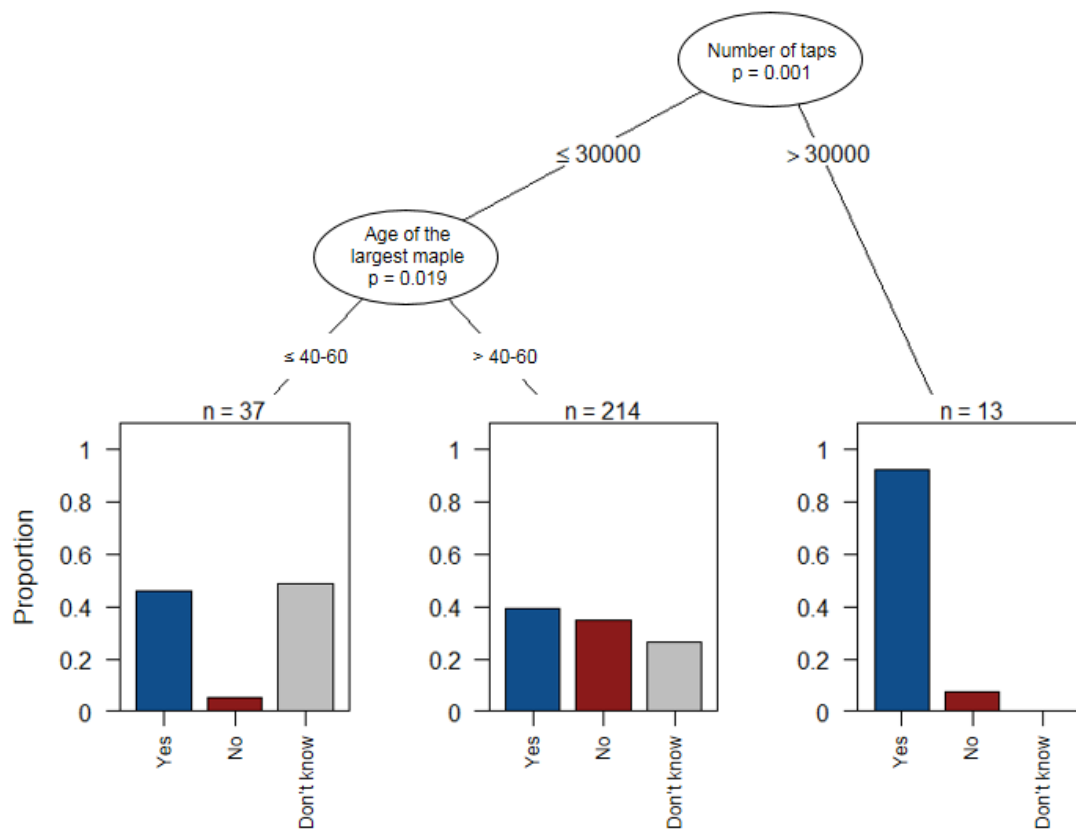

**Fig. AI.** CA = 38.6%.

Which of these adaptation measures would you like to use yourself?

## Keeping track of new research about maple syrup production

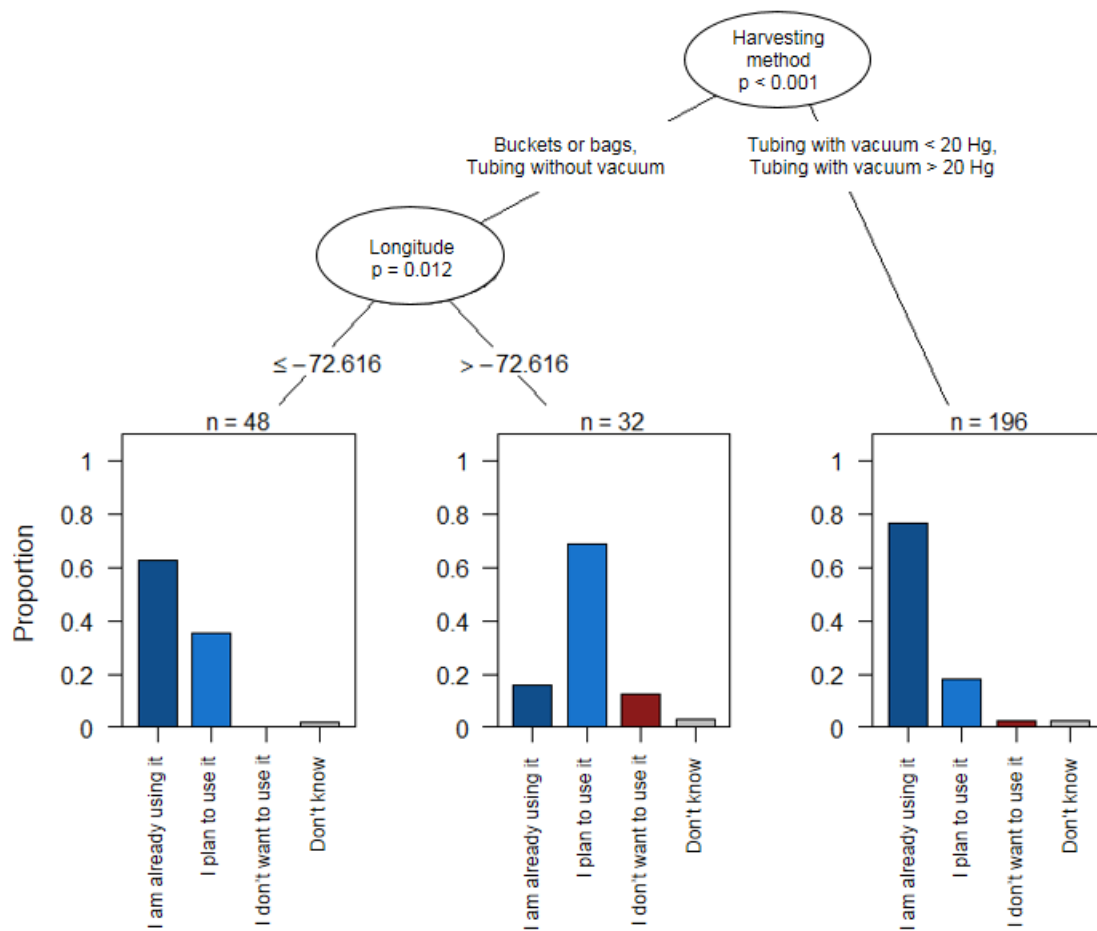

Fig. AJ. CA = 57.1%.

Which of these adaptation measures would you like to use yourself?

**Doing silvicultural management in your sugar bush, for example, maintain the density of trees at a good level or to favor biodiversity**

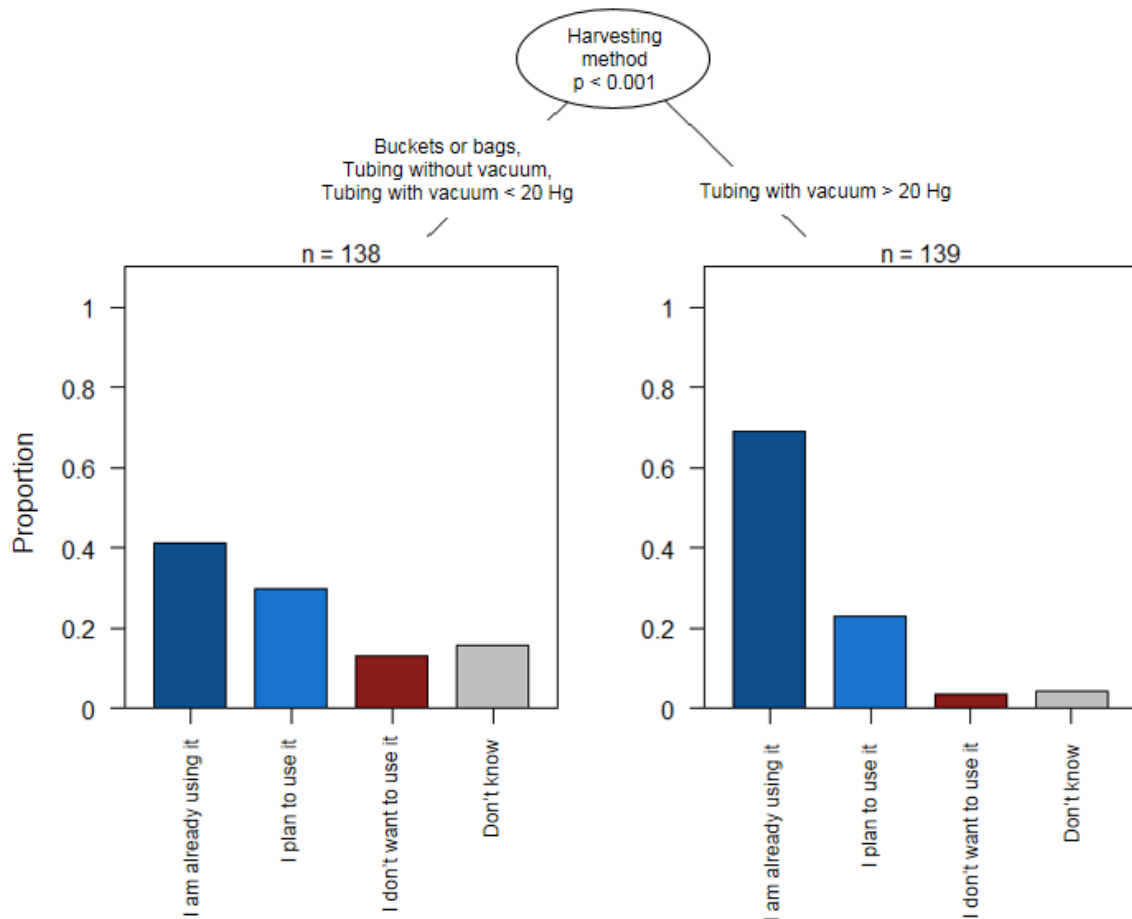

**Fig. AK.** CA = 55.7%.

Which of these adaptation measures would you like to use yourself?

**Adopting strong sanitation practices  
(tubing and spout cleaning and/or annual spout replacement)**

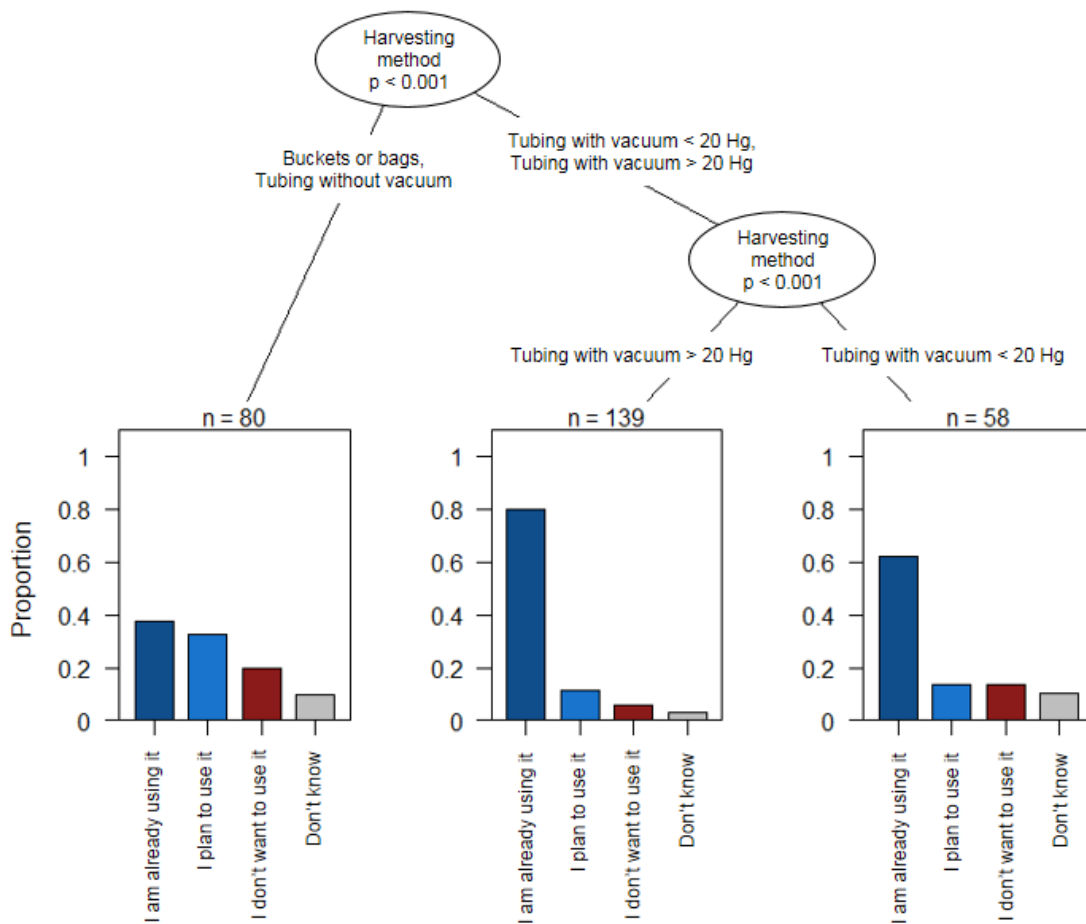

**Fig. AL.** CA = 55.7%.

Which of these adaptation measures would you like to use yourself?

### Tapping earlier in the year

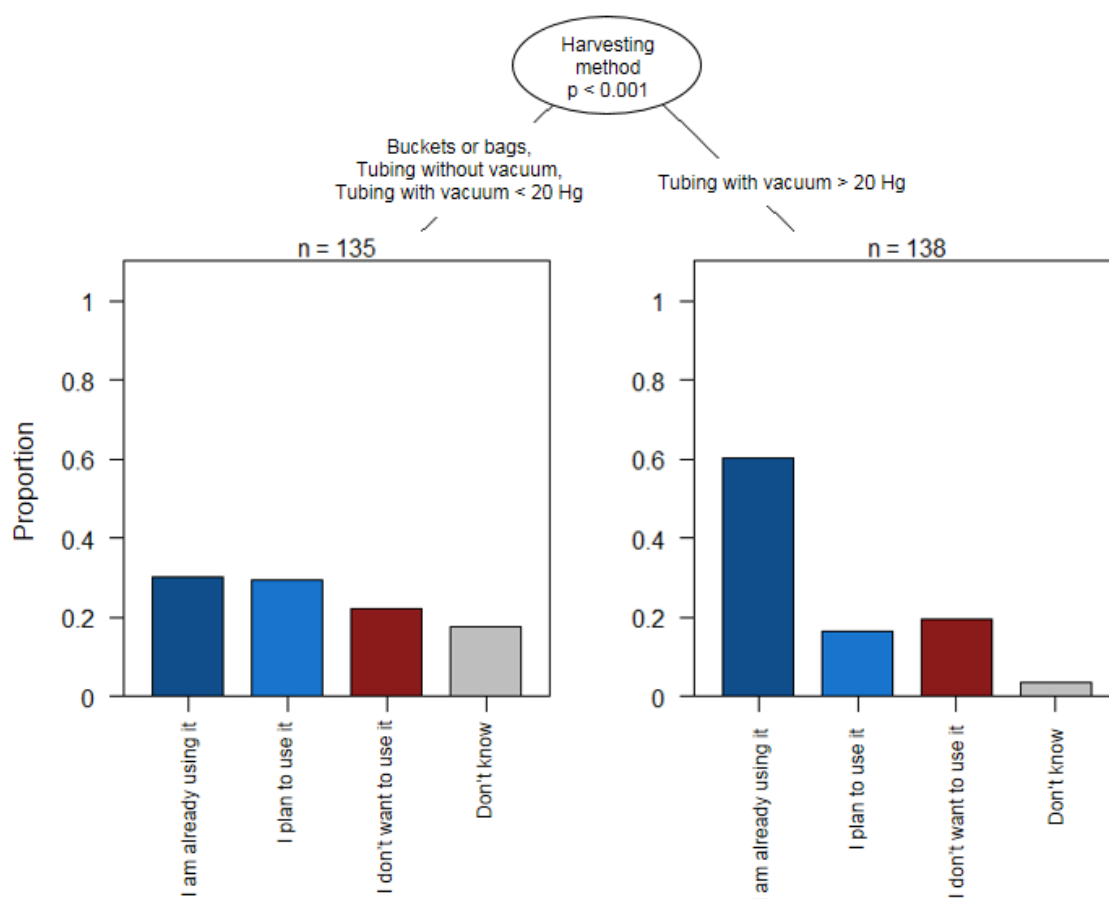

**Fig. AM.** CA = 34.3%.



Which of these adaptation measures would you like to use yourself?

### Installing a high-vacuum tubing system for sap collection

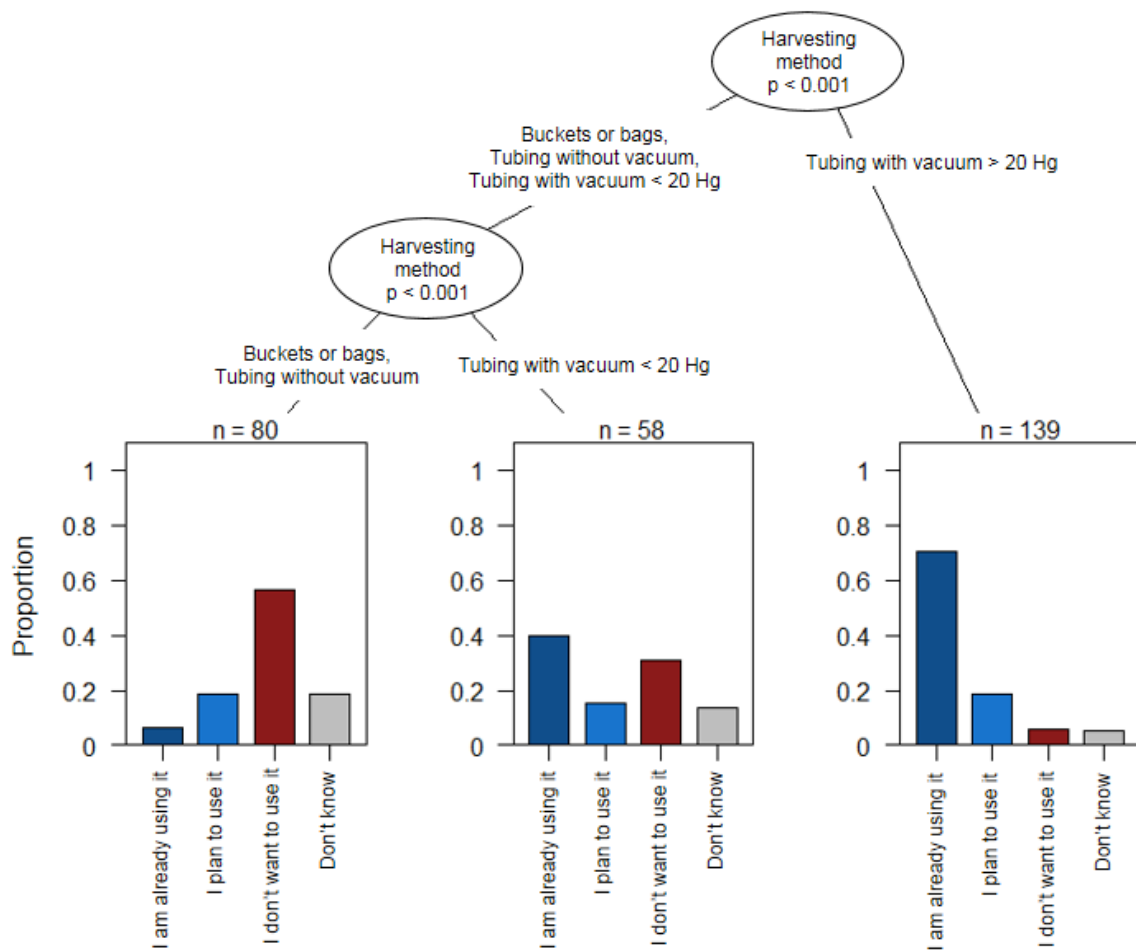

Fig. AN. CA = 58.6%.

Which of these adaptation measures would you like to use yourself?

### Liming and fertilizing to limit maple dieback

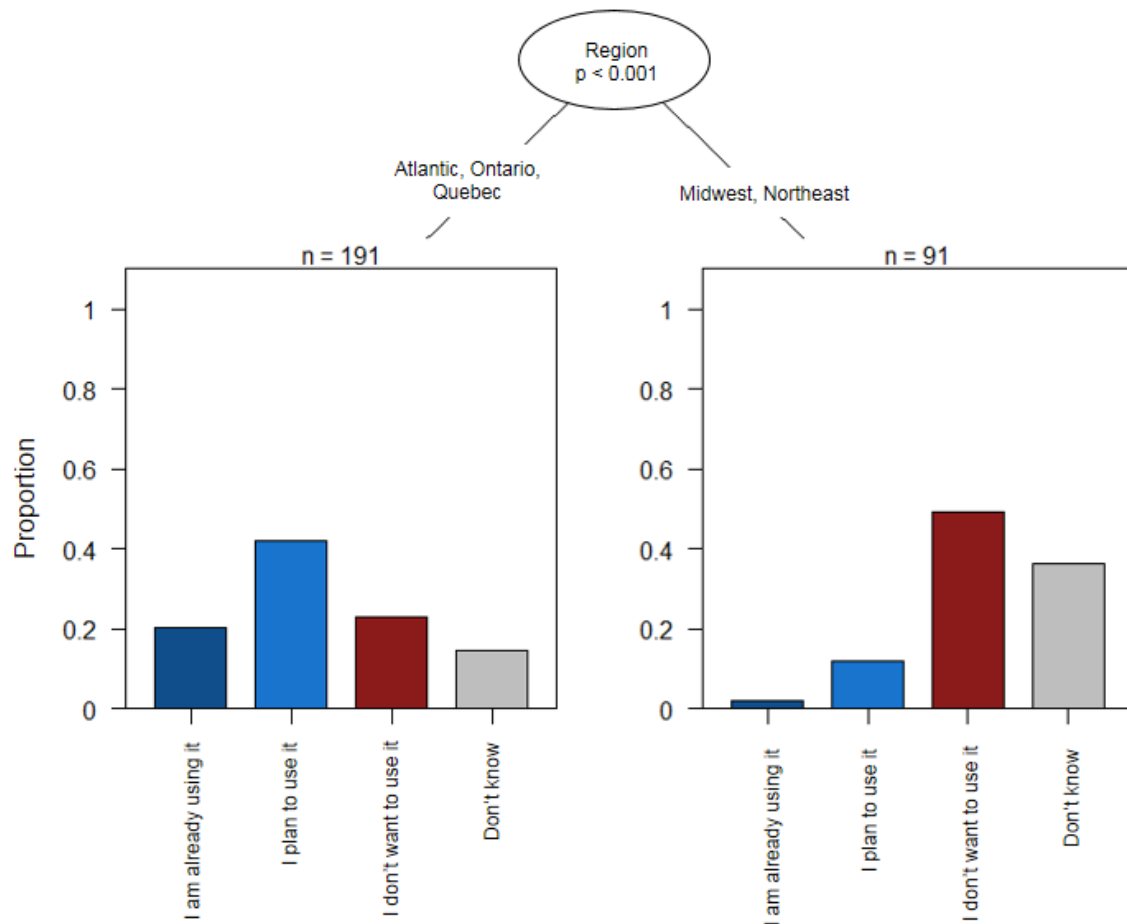

**Fig. AO.** CA = 37.1%.

Which of these adaptation measures would you like to use yourself?

### Tapping red maples

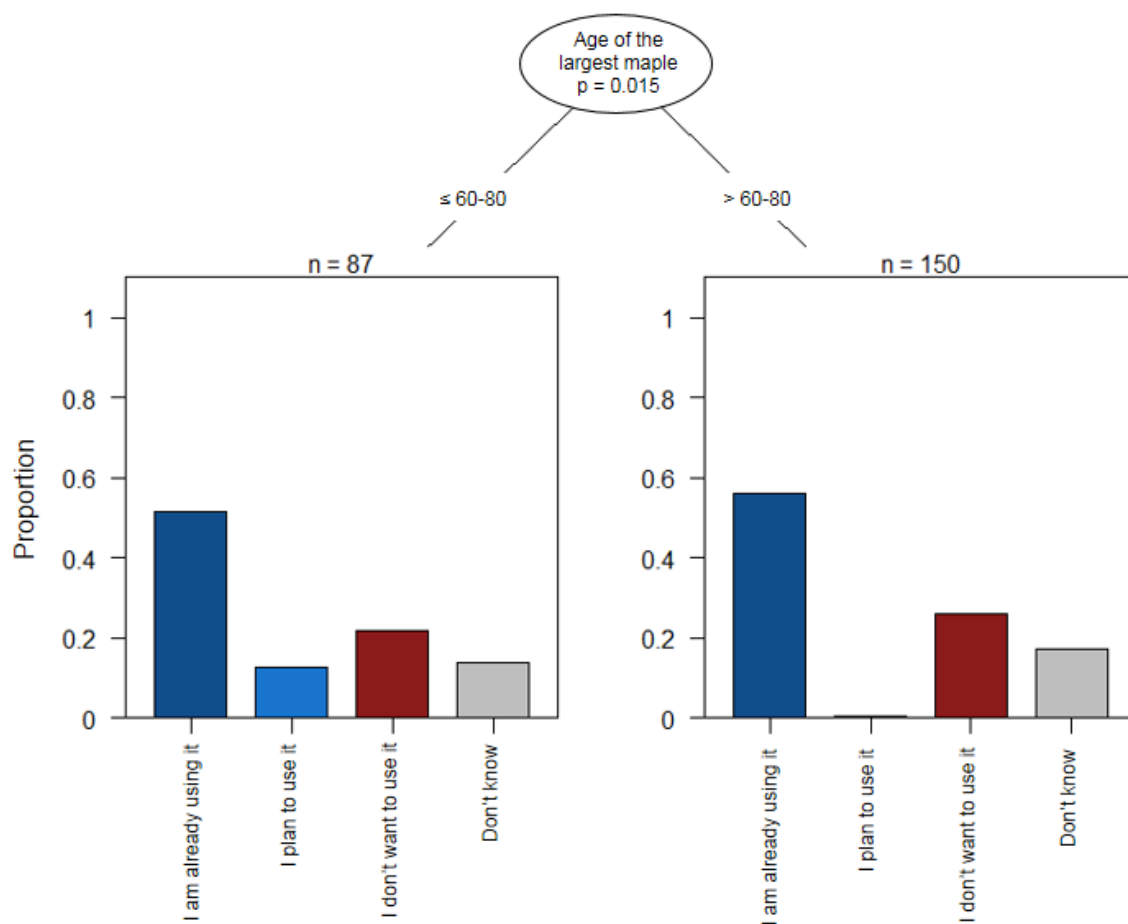

**Fig. AP.** CA = 57.1%.

Which of these adaptation measures would you like to use yourself?

### Using maples adapted to future climate conditions

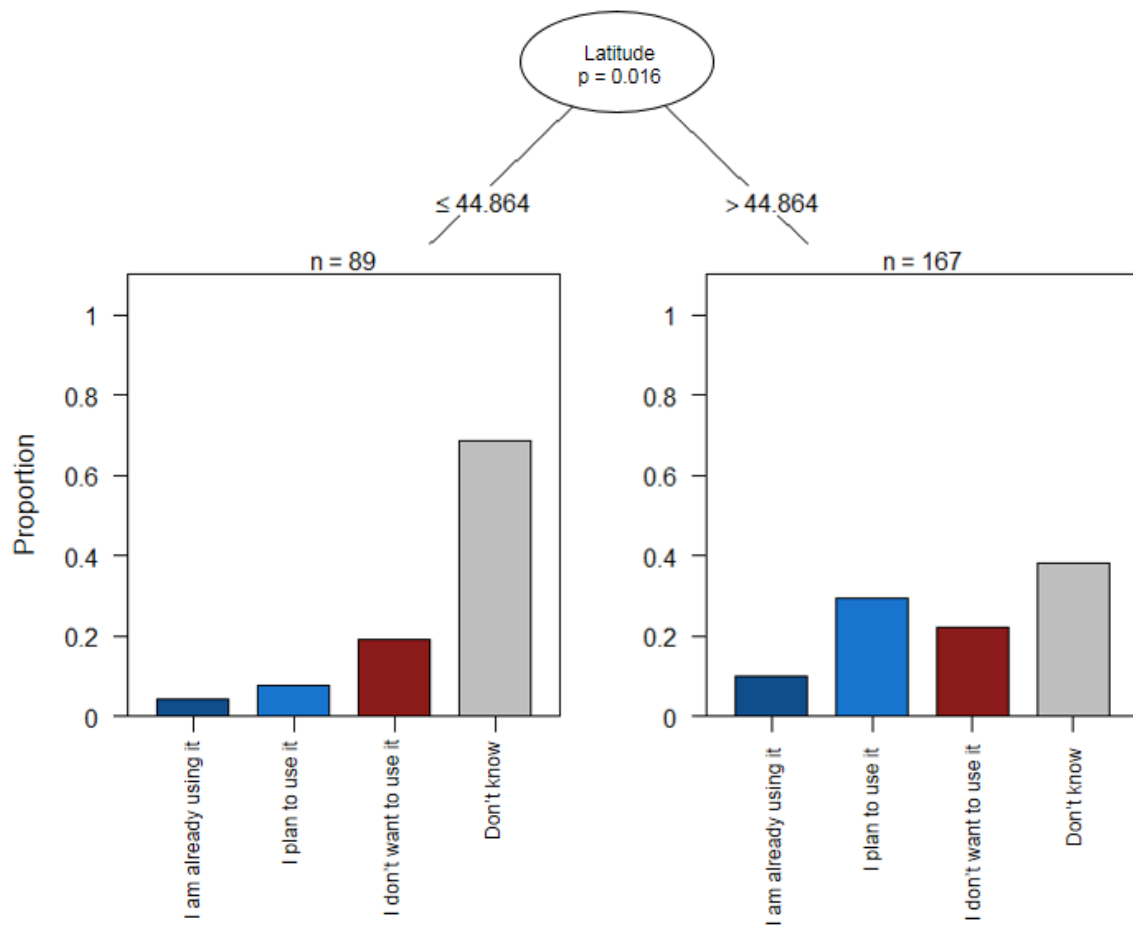

Fig. AQ. CA = 58.6%.

Which of these adaptation measures would you like to see used  
by the maple syrup industry?

**Promoting the distinctive syrup harvested  
in the very late season**

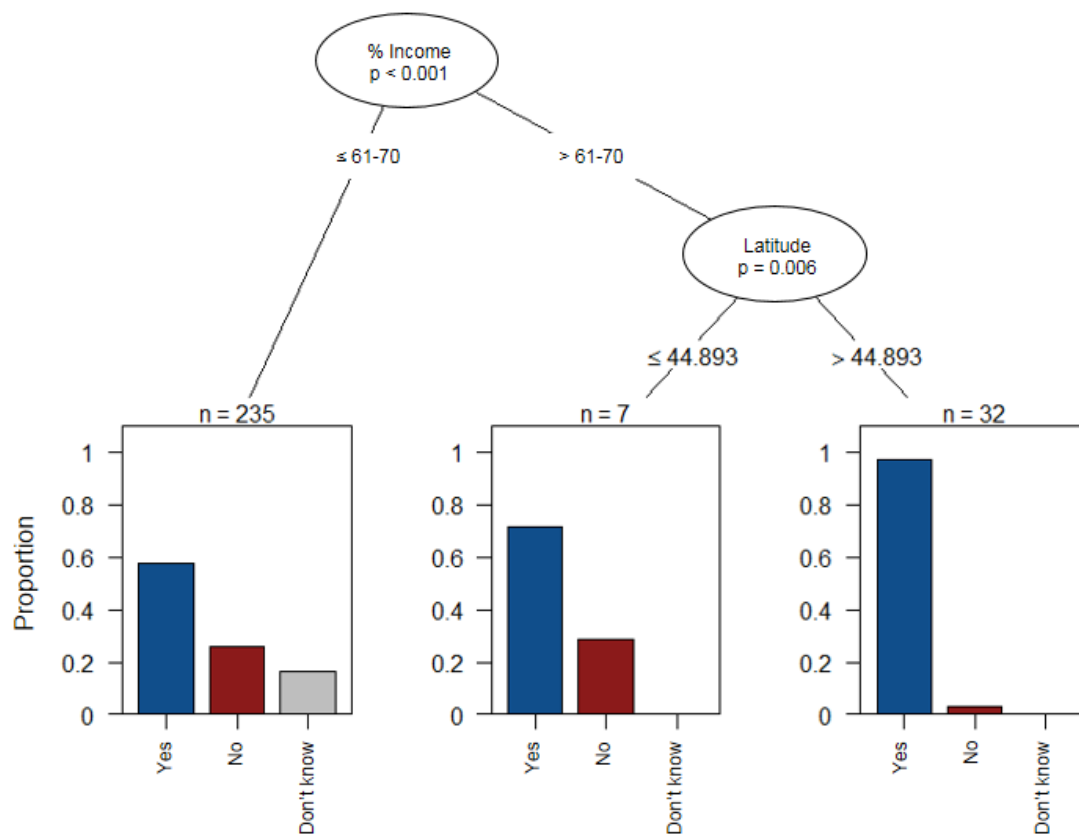

**Fig. AR.** CA = 57.1%.

To understand how easily your business would be able to adapt (if needed) to any potential impacts of climate change in the future, please indicate if you agree or disagree with each statement below.

**If any changes in labor (number of workers, and/or hours worked) are needed due to climate change, my business could quickly get the help it needs to operate**

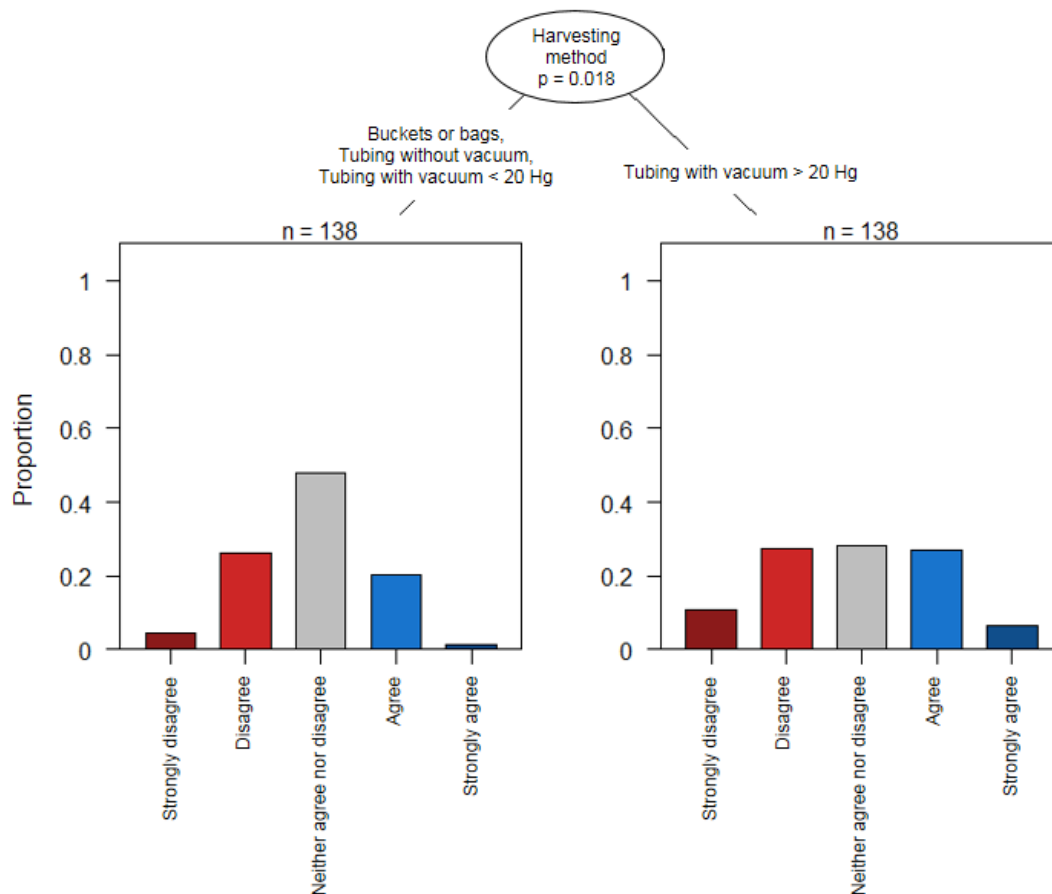

**Fig. AS.** CA = 34.3%.

To understand how easily your business would be able to adapt (if needed) to any potential impacts of climate change in the future, please indicate if you agree or disagree with each statement below.

**If any severe damage to my sugar bush occurred due to climate change, my business could quickly change how it collects and/or obtains sap**

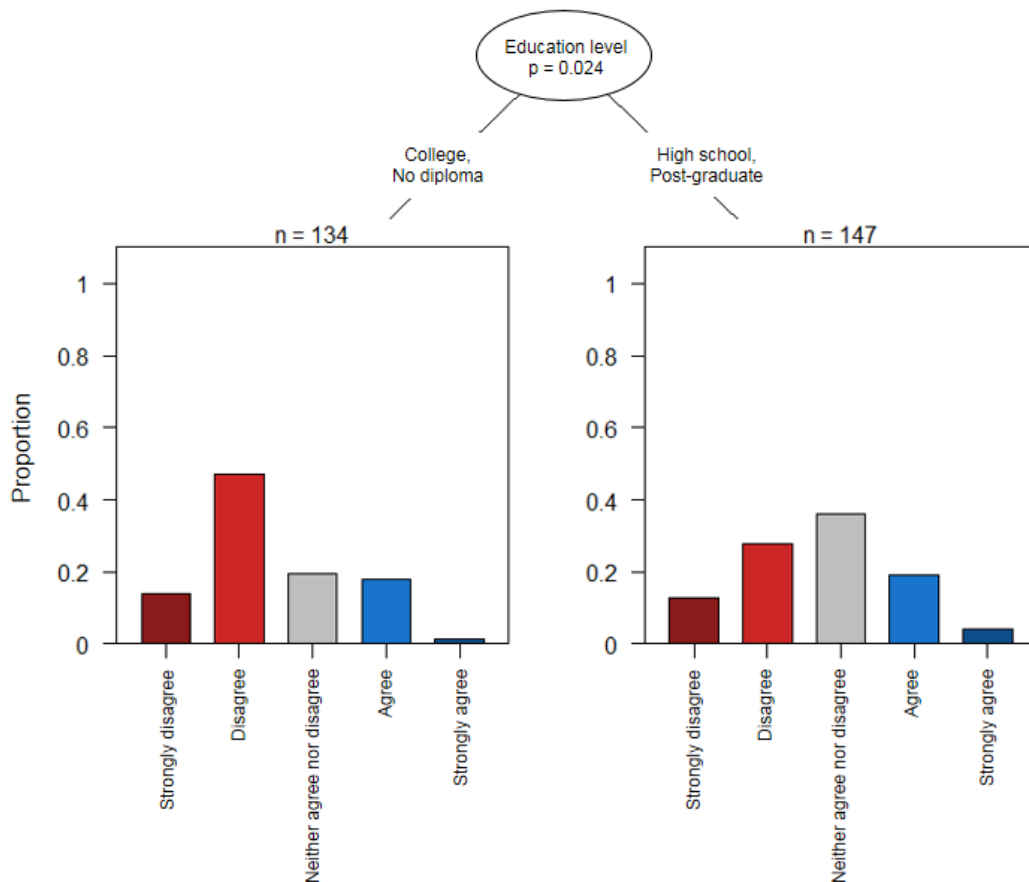

**Fig. AT.** CA = 22.9%.

Are the following constraints limiting your adoption of new technologies and strategies designed to reduce the impacts of climate change on your business?

### Lack of information

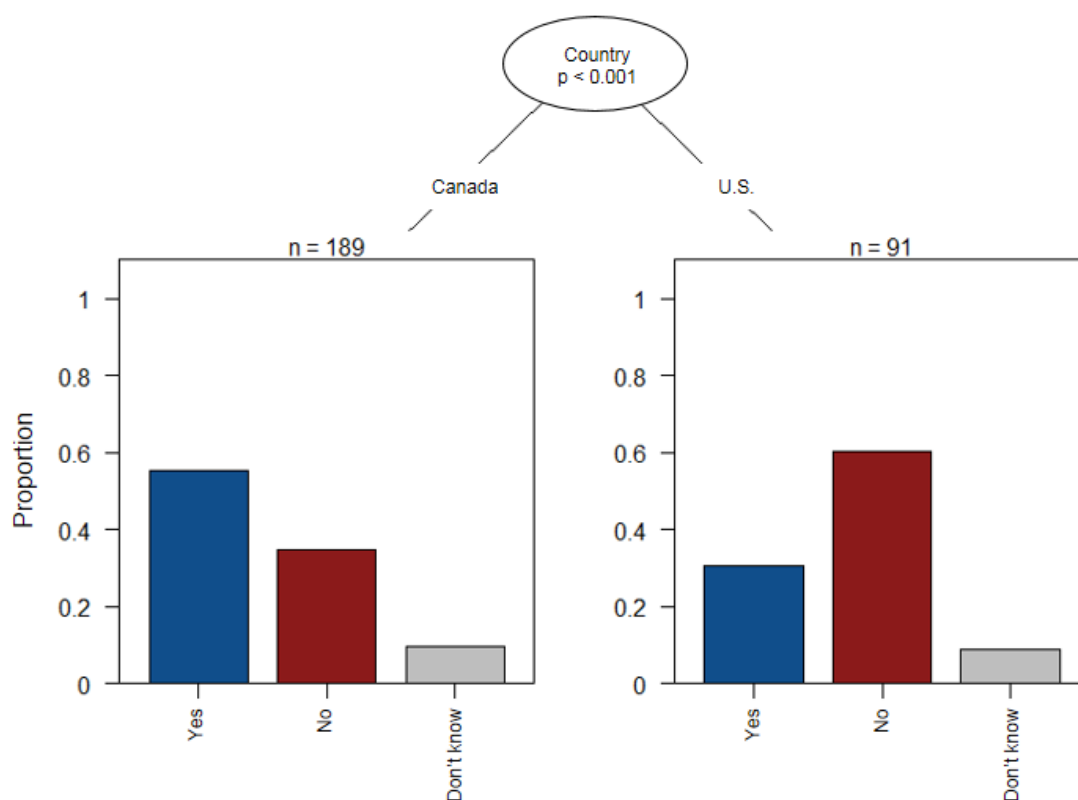

**Fig. AU.** CA = 55.7%.



Are the following constraints limiting your adoption of new technologies and strategies designed to reduce the impacts of climate change on your business?

### Lack of financial means

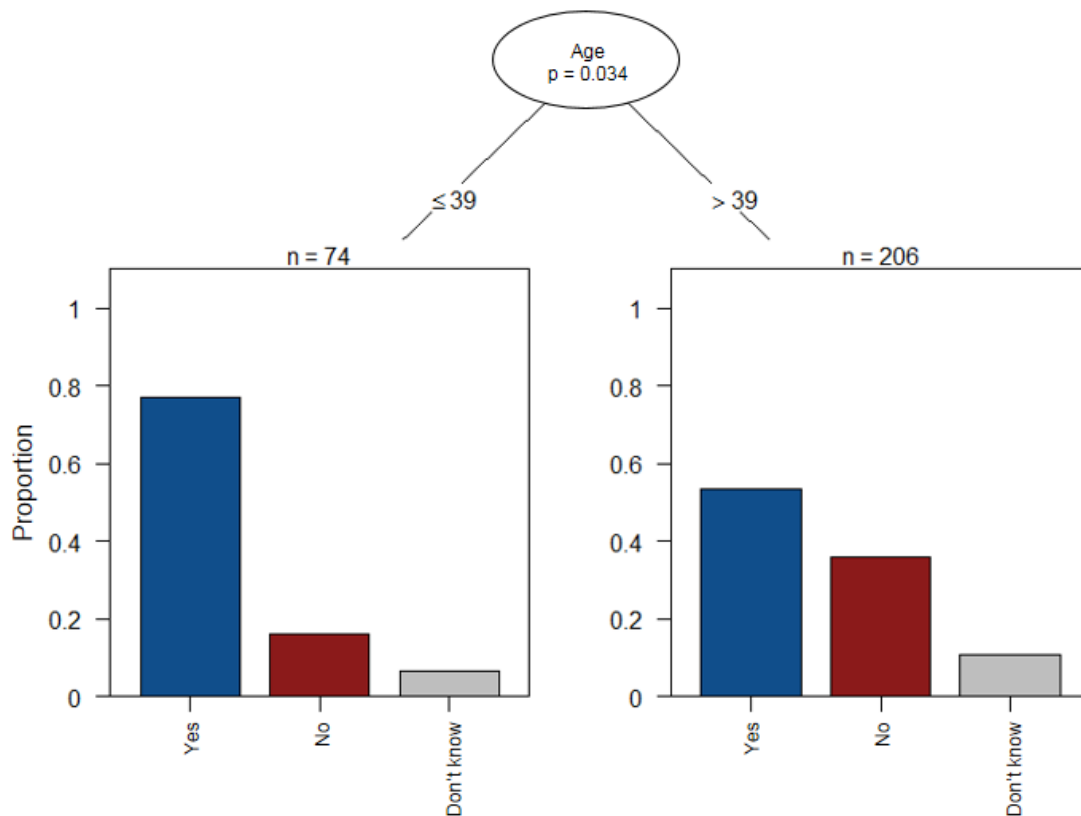

**Fig. AV.** CA = 58.6%.

Are the following constraints limiting your adoption of new technologies and strategies designed to reduce the impacts of climate change on your business?

### Lack of technical support

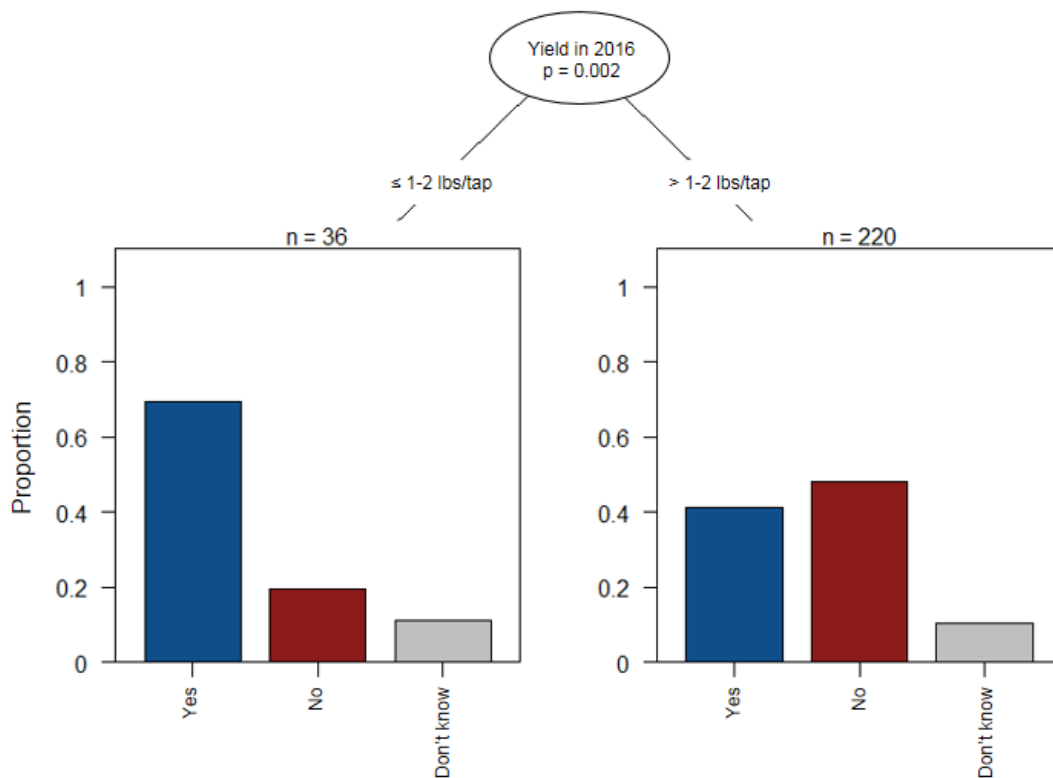

**Fig. AW.** CA = 38.6%.

Are the following constraints limiting your adoption of new technologies and strategies designed to reduce the impacts of climate change on your business?

**I don't believe climate change will have much impact on my syrup production**

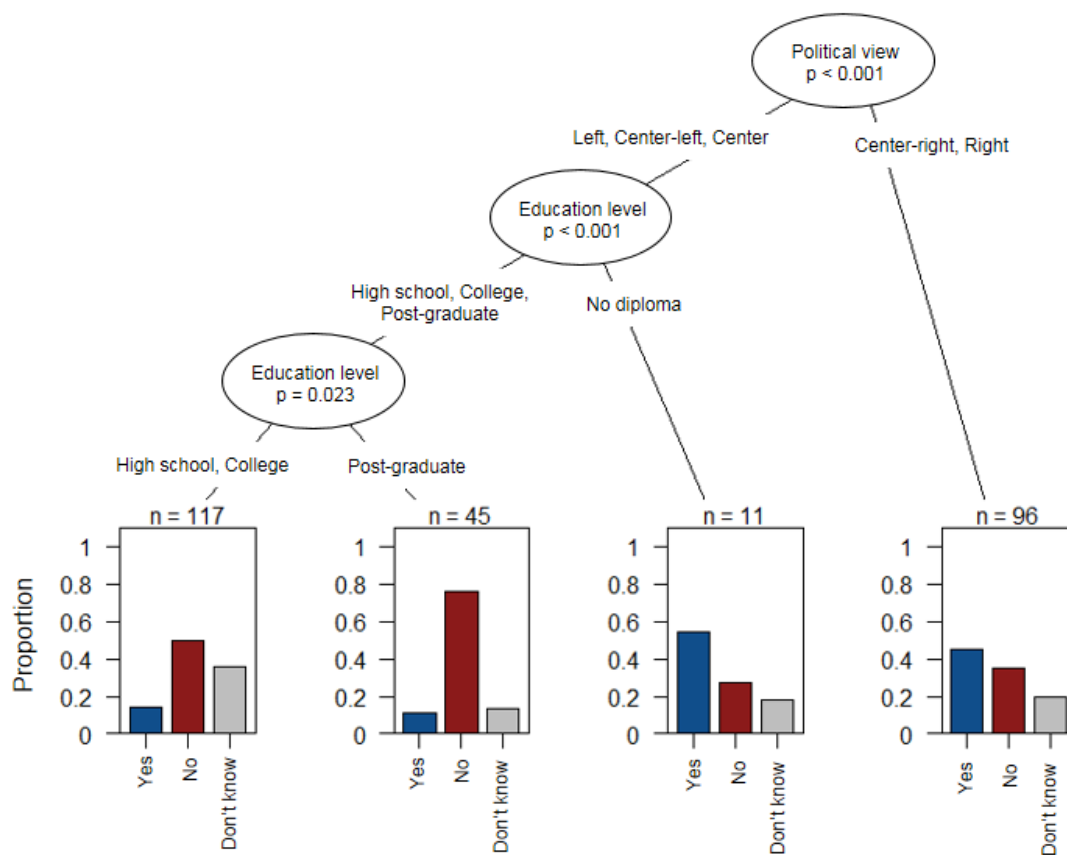

**Fig. AX.** CA = 31.4%.
